# Supplementary material for: Changes in laboratory value improvement and mortality rates over the course of the pandemic: an international retrospective cohort study of hospitalised patients infected with SARS-CoV-2
Source: PubMed Central journal article supplement — BMJ Open. 2022 Jun 22;12(6):e057725. doi: 10.1136/bmjopen-2021-057725 (PMC9226470; doi:10.1136/bmjopen-2021-057725), 2022-06-22
Supplement: bmjopen-2021-057725.draft_revisions.pdf [file bmjopen-2021-057725.draft_revisions.pdf]

# BMJ Open

BMJ Open is committed to open peer review. As part of this commitment we make the peer review history of every article we publish publicly available.

When an article is published we post the peer reviewers' comments and the authors' responses online. We also post the versions of the paper that were used during peer review. These are the versions that the peer review comments apply to.

The versions of the paper that follow are the versions that were submitted during the peer review process. They are not the versions of record or the final published versions. They should not be cited or distributed as the published version of this manuscript.

BMJ Open is an open access journal and the full, final, typeset and author-corrected version of record of the manuscript is available on our site with no access controls, subscription charges or pay-per-view fees (<http://bmjopen.bmj.com>).

If you have any questions on BMJ Open's open peer review process please email [info.bmjopen@bmj.com](mailto:info.bmjopen@bmj.com)

# BMJ Open

## Increased laboratory value normalization and survival in an international cohort of hospitalized patients with SARS-CoV-2: a temporal analysis of the pandemic

|                               |                                                                                                                                                                                                                                                                                                                                                                                                                                                                                                                                                                                                                                                                                                                                                                                                                                                                                                                                                                                                                                                                                                                                                                                                                                                                                                                                                                                                                                                                                                                                                                                                                                                                                                                                                                                                                                                                                                                                                                                                                                                                                |
|-------------------------------|--------------------------------------------------------------------------------------------------------------------------------------------------------------------------------------------------------------------------------------------------------------------------------------------------------------------------------------------------------------------------------------------------------------------------------------------------------------------------------------------------------------------------------------------------------------------------------------------------------------------------------------------------------------------------------------------------------------------------------------------------------------------------------------------------------------------------------------------------------------------------------------------------------------------------------------------------------------------------------------------------------------------------------------------------------------------------------------------------------------------------------------------------------------------------------------------------------------------------------------------------------------------------------------------------------------------------------------------------------------------------------------------------------------------------------------------------------------------------------------------------------------------------------------------------------------------------------------------------------------------------------------------------------------------------------------------------------------------------------------------------------------------------------------------------------------------------------------------------------------------------------------------------------------------------------------------------------------------------------------------------------------------------------------------------------------------------------|
| Journal:                      | <i>BMJ Open</i>                                                                                                                                                                                                                                                                                                                                                                                                                                                                                                                                                                                                                                                                                                                                                                                                                                                                                                                                                                                                                                                                                                                                                                                                                                                                                                                                                                                                                                                                                                                                                                                                                                                                                                                                                                                                                                                                                                                                                                                                                                                                |
| Manuscript ID                 | bmjopen-2021-057725                                                                                                                                                                                                                                                                                                                                                                                                                                                                                                                                                                                                                                                                                                                                                                                                                                                                                                                                                                                                                                                                                                                                                                                                                                                                                                                                                                                                                                                                                                                                                                                                                                                                                                                                                                                                                                                                                                                                                                                                                                                            |
| Article Type:                 | Original research                                                                                                                                                                                                                                                                                                                                                                                                                                                                                                                                                                                                                                                                                                                                                                                                                                                                                                                                                                                                                                                                                                                                                                                                                                                                                                                                                                                                                                                                                                                                                                                                                                                                                                                                                                                                                                                                                                                                                                                                                                                              |
| Date Submitted by the Author: | 30-Sep-2021                                                                                                                                                                                                                                                                                                                                                                                                                                                                                                                                                                                                                                                                                                                                                                                                                                                                                                                                                                                                                                                                                                                                                                                                                                                                                                                                                                                                                                                                                                                                                                                                                                                                                                                                                                                                                                                                                                                                                                                                                                                                    |
| Complete List of Authors:     | <p>Hong, Chuan; Harvard Medical School, Department of Biomedical Informatics</p> <p>Zhang, Harrison; Harvard Medical School, Department of Biomedical Informatics</p> <p>L'Yi, Sehi; Harvard Medical School, Department of Biomedical Informatics</p> <p>Weber, Griffin; Harvard Medical School, Department of Biomedical Informatics</p> <p>Avillach, Paul; Harvard Medical School, Department of Biomedical Informatics</p> <p>Tan, Bryce; National University Hospital, Department of Medicine</p> <p>Gutiérrez-Sacristán, Alba; Harvard Medical School, Department of Biomedical Informatics</p> <p>Bonzel, Clara-Lea; Harvard Medical School, Department of Biomedical Informatics</p> <p>Palmer, Nathan; Harvard Medical School, Department of Biomedical Informatics</p> <p>Malovini, Alberto; Istituti Clinici Scientifici Maugeri SpA SB IRCCS, Laboratory of Informatics and Systems Engineering for Clinical Research</p> <p>Tibollo, Valentina; Istituti Clinici Scientifici Maugeri SpA SB IRCCS, Laboratory of Informatics and Systems Engineering for Clinical Research</p> <p>Luo, Yuan; Northwestern University, Department of Preventive Medicine</p> <p>Hutch, Meghan; Northwestern University, Department of Preventive Medicine</p> <p>Liu, Molei; Harvard University T H Chan School of Public Health, Department of Biostatistics</p> <p>Bourgeois, Florence; Harvard Medical School, Department of Pediatrics</p> <p>Bellazzi, Riccardo; University of Pavia, Department of Electrical, Computer and Biomedical Engineering</p> <p>Chiovato, Luca; Istituti Clinici Scientifici Maugeri SpA SB IRCCS, Unit of Internal Medicine and Endocrinology</p> <p>Sanz Vidorreta, Fernando; David Geffen School of Medicine, Department of Medicine</p> <p>Le, Trang; University of Pennsylvania Perelman School of Medicine, Department of Biostatistics, Epidemiology, and Informatics</p> <p>Wang, Xuan; Harvard Medical School, Department of Biomedical Informatics</p> <p>Yuan, William; Harvard Medical School, Department of Biomedical Informatics</p> |

1  
2  
3  
4 Neuraz, Antoine; Hopital universitaire Necker-Enfants malades,  
Department of Biomedical Informatics  
5 Benoit, Vincent; APHP Greater Paris University Hospital, IT department,  
6 Innovation & Data  
7 Moal, Bertrand; Bordeaux University Hospital, IAM unit  
8 Morris, Michele; University of Pittsburgh, Department of Biomedical  
9 Informatics  
10 Hanauer, David; University of Michigan Medical School, Department of  
11 Learning Health Sciences  
12 Maidlow, Sarah; University of Michigan, MICHHR Informatics  
13 Wagholikar, Kavishwar; Massachusetts General Hospital, Department of  
14 Medicine  
15 Murphy, Shawn; Massachusetts General Hospital, Neurology  
16 Estiri, Hossein; Massachusetts General Hospital, Department of Medicine  
17 Makoudjou, Adeline; University of Freiburg Faculty of Medicine, Institute  
18 of Medical Biometry and Statistics  
19 Tippmann, Patric; Medical Center-University of Freiburg, Institute of  
20 Medical Biometry and Statistics  
21 Klann, Jeffery; Massachusetts General Hospital, Department of Medicine  
22 Follett, Robert; David Geffen School of Medicine, Department of Medicine  
23 Gehlenborg, Nils; Harvard Medical School, Department of Biomedical  
24 Informatics  
25 Omenn, Gilbert; University of Michigan, Computational Medicine &  
26 Bioinformatics  
27 Xia, Zongqi; University of Pittsburgh, Department of Neurology  
28 Dagliati, Arianna; University of Pavia, Department of Electrical Computer  
29 and Biomedical Engineering  
30 Visweswaran, Shyam; University of Pittsburgh, Department of  
31 Biomedical Informatics  
32 Patel, Lav; University of Kansas Medical Center, Department of Internal  
33 Medicine, Division of Medical Informatics  
34 Mowery, Danielle; University of Pennsylvania Perelman School of  
35 Medicine, Department of Biostatistics, Epidemiology, and Informatics  
36 Schriver, Emily; University of Pennsylvania Health System, Data  
37 Analytics Center  
38 Samayamuthu, Malarkodi Jebathilagam; University of Pittsburgh,  
39 Biomedical Informatics  
40 Kavuluru, Ramakanth ; University of Kentucky, Institute for Biomedical  
41 Informatics  
42 Lozano-Zahonero, Sara; University of Freiburg Faculty of Medicine,  
43 Institute of Medical Biometry and Statistics  
44 Zöllner, Daniela; University of Freiburg Faculty of Medicine, Institute of  
45 Medical Biometry and Statistics  
46 Tan, Amelia; Harvard Medical School, Department of Biomedical  
47 Informatics  
48 Tan, Byorn; National University Hospital, Department of Medicine  
49 Ngiam, Kee Yuan; National University Hospital, Department of Surgery  
50 Holmes, John; University of Pennsylvania Perelman School of Medicine,  
51 Department of Biostatistics, Epidemiology and Informatics; University of  
52 Pennsylvania Perelman School of Medicine, Institute for Biomedical  
53 Informatics  
54 Schubert, Petra; VA Boston Healthcare System, Massachusetts Veterans  
55 Epidemiology Research and Information Center (MAVERIC)  
56 Cho, Kelly; VA Boston Healthcare System, Massachusetts Veterans  
57 Epidemiology Research and Information Center (MAVERIC)  
58 Ho, Yuk-Lam; VA Boston Healthcare System, Massachusetts Veterans  
59 Epidemiology Research and Information Center (MAVERIC)  
60 Beaulieu-Jones, Brett K. ; Harvard Medical School, Biomedical  
Informatics  
Pedrera-Jiménez, Miguel; Hospital Universitario 12 de Octubre, Health  
Informatics

|           |                                                                                                                                                                                                                                                                                                                                                                                                                                                                                                                                                                                                                                                 |
|-----------|-------------------------------------------------------------------------------------------------------------------------------------------------------------------------------------------------------------------------------------------------------------------------------------------------------------------------------------------------------------------------------------------------------------------------------------------------------------------------------------------------------------------------------------------------------------------------------------------------------------------------------------------------|
|           | García-Barrio, Noelia; Hospital Universitario 12 de Octubre, Health Informatics<br>Serrano-Balazote, Pablo; Hospital Universitario 12 de Octubre, Health Informatics<br>Kohane, Isaac; Harvard Medical School, Department of Biomedical Informatics<br>Characterization of COVID-19 by EHR (4CE), The Consortium for Clinical; Harvard Medical School, Department of Biomedical Informatics<br>South , Andrew; Wake Forest University, Department of Pediatrics, Section of Nephrology<br>Brat, Gabriel A; Harvard Medical School, Department of Biomedical Informatics<br>Cai, T; Harvard Medical School, Department of Biomedical Informatics |
| Keywords: | COVID-19, Public health < INFECTIOUS DISEASES, Epidemiology < INFECTIOUS DISEASES                                                                                                                                                                                                                                                                                                                                                                                                                                                                                                                                                               |
|           |                                                                                                                                                                                                                                                                                                                                                                                                                                                                                                                                                                                                                                                 |

SCHOLARONE™  
Manuscripts



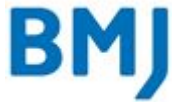

I, the Submitting Author has the right to grant and does grant on behalf of all authors of the Work (as defined in the below author licence), an exclusive licence and/or a non-exclusive licence for contributions from authors who are: i) UK Crown employees; ii) where BMJ has agreed a CC-BY licence shall apply, and/or iii) in accordance with the terms applicable for US Federal Government officers or employees acting as part of their official duties; on a worldwide, perpetual, irrevocable, royalty-free basis to BMJ Publishing Group Ltd ("BMJ") its licensees and where the relevant Journal is co-owned by BMJ to the co-owners of the Journal, to publish the Work in this journal and any other BMJ products and to exploit all rights, as set out in our [licence](#).

The Submitting Author accepts and understands that any supply made under these terms is made by BMJ to the Submitting Author unless you are acting as an employee on behalf of your employer or a postgraduate student of an affiliated institution which is paying any applicable article publishing charge ("APC") for Open Access articles. Where the Submitting Author wishes to make the Work available on an Open Access basis (and intends to pay the relevant APC), the terms of reuse of such Open Access shall be governed by a Creative Commons licence – details of these licences and which [Creative Commons](#) licence will apply to this Work are set out in our licence referred to above.

Other than as permitted in any relevant BMJ Author's Self Archiving Policies, I confirm this Work has not been accepted for publication elsewhere, is not being considered for publication elsewhere and does not duplicate material already published. I confirm all authors consent to publication of this Work and authorise the granting of this licence.

**Increased laboratory value normalization and survival in an  
international cohort of hospitalized patients with SARS-CoV-2:  
a temporal analysis of the pandemic**

Chuan Hong PhD<sup>1\*</sup>, Harrison G Zhang<sup>1\*</sup>, Sehi L'Yi PhD<sup>1\*</sup>, Griffin M Weber MD, PhD<sup>1</sup>, Paul Avillach MD, PhD<sup>1</sup>, Bryce W.Q. Tan MBBS<sup>2</sup>, Alba Gutiérrez Sacristán PhD<sup>1</sup>, Clara-Lea Bonzel MSc<sup>1</sup>, Nathan P Palmer PhD<sup>1</sup>, Alberto Malovini PhD<sup>3</sup>, Valentina Tibollo MS<sup>3</sup>, Yuan Luo PhD<sup>4</sup>, Meghan R Hutch BS<sup>4</sup>, Molei Liu MSc<sup>5</sup>, Florence T Bourgeois<sup>6</sup>, Riccardo Bellazzi MS, PhD<sup>7</sup>, Luca Chiovato MD, PhD<sup>8</sup>, Fernando J. Sanz Vidorreta BS<sup>9</sup>, Trang T Le PhD<sup>10</sup>, Xuan Wang PhD<sup>1</sup>, William Yuan PhD<sup>1</sup>, Antoine Neuraz MD, PhD<sup>11</sup>, Vincent Benoit PhD<sup>12</sup>, Bertrand Moal MD, PhD<sup>13</sup>, Michele Morris BA<sup>14</sup>, David A Hanauer MD, MS<sup>15</sup>, Sarah Maidlow<sup>16</sup>, Kavishwar B Wagholikar MBBS, PhD<sup>17</sup>, Shawn N Murphy MD, PhD<sup>17</sup>, Hossein Estiri PhD<sup>17</sup>, Adeline Makoudjou MD<sup>18</sup>, Patric Tippmann MSc<sup>18</sup>, Jeffrey G Klann MEng, PhD<sup>17</sup>, Robert W Follett<sup>9</sup>, Nils Gehlenborg<sup>1</sup>, Gilbert S Omenn MD, PhD<sup>19</sup>, Zongqi Xia MD, PhD<sup>20</sup>, Arianna Dagliati MS, PhD<sup>7</sup>, Shyam Visweswaran MD, PhD<sup>14</sup>, Lav P Patel MS<sup>21</sup>, Danielle L Mowery PhD<sup>10</sup>, Emily R Schriver MS<sup>22</sup>, Malarkodi J Samayamuthu MD<sup>14</sup>, Ramakanth Kavuluru PhD<sup>23</sup>, Sara Lozano-Zahonero PhD<sup>18</sup>, Daniela Zoeller PhD<sup>18</sup>, Amelia LM Tan BSc, PhD<sup>1</sup>, Byorn W.L. Tan MBBS<sup>2</sup>, Kee Yuan Ngiam MBBS, MRCS, MMed, FRCS<sup>24</sup>, John H Holmes MS, PhD<sup>10,25</sup>, Petra Schubert MPH<sup>26</sup>, Kelly Cho PhD<sup>26</sup>, Yuk-Lam Ho MPH<sup>26</sup>, Brett K. Beaulieu-Jones PhD<sup>1</sup>, Miguel Pedrera-Jiménez MS<sup>27</sup>, Noelia García-Barrio MS<sup>27</sup>, Pablo Serrano-Balazote MD, MS<sup>27</sup>, The Consortium for Clinical Characterization of COVID-19 by EHR (4CE)<sup>1</sup>, Isaac S Kohane MD, PhD<sup>1</sup>, Andrew M South MD, MS<sup>28†</sup>, Gabriel A Brat MD, MPH<sup>1†</sup>, Tianxi Cai ScD<sup>1†</sup>

\*Hong, Zhang and L'Yi contributed equally

†South, Brat and Cai contributed equally

1. Department of Biomedical Informatics, Harvard Medical School, Boston, MA, USA
2. Department of Medicine, National University Hospital, Singapore
3. Laboratory of Informatics and Systems Engineering for Clinical Research, Istituti Clinici Scientifici Maugeri SpA SB IRCCS, Pavia, Italy
4. Department of Preventive Medicine, Northwestern University, Chicago, IL, USA
5. Department of Biostatistics, Harvard T.H. Chan School of Public Health, Boston, MA, USA
6. Department of Pediatrics, Harvard Medical School, Boston, MA, USA
7. Department of Electrical, Computer and Biomedical Engineering, University of Pavia, Italy
8. Unit of Internal Medicine and Endocrinology, Istituti Clinici Scientifici Maugeri SpA SB IRCCS, Pavia, Italy
9. Department of Medicine, David Geffen School of Medicine at UCLA, Los Angeles, CA, USA

10. Department of Biostatistics, Epidemiology, and Informatics, University of Pennsylvania Perelman School of Medicine, Philadelphia, PA, USA
11. Department of Biomedical Informatics, Hôpital Necker-Enfants Malade, Assistance Publique Hôpitaux de Paris (APHP), University of Paris, France
12. IT department, Innovation & Data, APHP Greater Paris University Hospital, Paris, France
13. IAM unit, Bordeaux University Hospital, Bordeaux, France
14. Department of Biomedical Informatics, University of Pittsburgh, PA, USA
15. Department of Learning Health Sciences, University of Michigan Medical School, Ann Arbor, MI, USA
16. MICHR Informatics, University of Michigan, Ann Arbor, MI, USA
17. Department of Medicine, Massachusetts General Hospital, Boston, MA, USA
18. Institute of Medical Biometry and Statistics, Faculty of Medicine and Medical Center, University of Freiburg, Freiburg, Germany
19. Dept of Computational Medicine & Bioinformatics, Internal Med, Human Genetics, and Public Health University of Michigan, Ann Arbor, MI, USA
20. Department of Neurology, University of Pittsburgh, PA, USA
21. Department of Internal Medicine, Division of Medical Informatics University Of Kansas Medical Center, Kansas City, KS, USA
22. Data Analytics Center, University of Pennsylvania Health System, Philadelphia, PA, USA
23. Institute for Biomedical Informatics, University of Kentucky, Lexington, KY, USA
24. Department of Biomedical informatics, WiSDM, National University Health Systems, Singapore
25. Institute for Biomedical Informatics, University of Pennsylvania Perelman School of Medicine, Philadelphia, PA, USA
26. Massachusetts Veterans Epidemiology Research and Information Center (MAVERIC), VA Boston Healthcare System, Boston, MA, USA
27. Health Informatics, Hospital Universitario 12 de Octubre, Madrid, Spain
28. Department of Pediatrics-Section of Nephrology, Brenner Children's Hospital, Wake Forest School of Medicine, Winston Salem, NC, USA

Correspondence to: Andrew M South MD, MS, Medical Center Boulevard, Winston Salem, NC 27157. Email: [asouth@wakehealth.edu](mailto:asouth@wakehealth.edu); Gabriel A Brat MD, MPH, Department of Biomedical Informatics, Harvard Medical School, 110 Francis St., Suite 3A, Boston, MA 02215. Email: [gbrat@bidmc.harvard.edu](mailto:gbrat@bidmc.harvard.edu); and Tianxi Cai ScD, Department of Biomedical Informatics, Harvard Medical School, 10 Shattuck St., Boston, Massachusetts 02115, USA. Email: [tcai@hsph.harvard.edu](mailto:tcai@hsph.harvard.edu).

Word count: 3550

**KEY POINTS:**

---

**QUESTION:** Have outcomes for hospitalized patients with severe acute respiratory syndrome coronavirus 2 (SARS-CoV-2) improved over time?

**FINDINGS:** In this cohort study of 83,178 patients hospitalized with SARS-CoV-2, 28-day mortality rates stratified by predicted low, medium, or high mortality risk using baseline covariates at admission all decreased over time. Patients admitted from July 2020 to January 2021 also exhibited faster improvement rates in laboratory values than patients admitted in March to June of 2020.

**MEANING:** Despite presenting with similar clinical profiles and laboratory values, patients experienced faster improvement and decreased mortality in later periods of the pandemic. This suggests that changes in medical management and improved resource utilization played a role in reducing mortality over time.

**ABSTRACT:**

---

**OBJECTIVE:** To assess changes in international mortality rates and laboratory recovery rates during hospitalization for patients hospitalized with SARS-CoV-2 between the first and second waves of the COVID-19 pandemic.

**DESIGN, SETTING, AND PARTICIPANTS:** This is a retrospective cohort study of 83,178 hospitalized patients admitted before or after polymerase chain reaction-confirmed SARS-CoV-2 infection within the Consortium for Clinical Characterization of COVID-19 by EHR (4CE), an international multi-healthcare system collaborative of 288 hospitals in the United States (US) and Europe.

**PRIMARY and SECONDARY OUTCOMES MEASURES:** The primary outcome was all-cause mortality rate within 28 days after hospitalization stratified by predicted low, medium, and high

1  
2  
3 mortality risk at baseline. The secondary outcome was the average rate of change in laboratory  
4 values during the first week of hospitalization.  
5  
6  
7

8 **RESULTS:** Baseline Charlson comorbidity index and laboratory values at admission were not  
9 significantly different between the first and second waves. The improvement in laboratory values  
10 over time was faster in the second wave compared to the first. The average CRP rate of change  
11 was  $-4.72$  vs.  $-4.14$  mg/dL per day ( $p=0.05$ ). The mortality rates within each risk category  
12 significantly decreased over time, with the most substantial decrease in the high-risk group  
13 ( $42.3\%$  in March–April 2020 vs  $30.8\%$  in November 2020–January 2021,  $p<0.001$ ) and a  
14 moderate decrease in the intermediate-risk group ( $21.5\%$  in March–April 2020 vs.  $14.3\%$  in  
15 November 2020–January 2021,  $p<0.001$ ).  
16  
17  
18  
19  
20  
21  
22

23 **CONCLUSIONS:** Admission profiles of patients hospitalized with SARS-CoV-2 infection did  
24 not differ greatly between the first and second waves of the pandemic, but there were notable  
25 differences in laboratory improvement rates during hospitalization. Mortality risks among  
26 patients with similar risk profiles decreased over the course of the pandemic. The improvement  
27 in laboratory values and mortality risk was consistent across multiple countries.  
28  
29  
30  
31  
32  
33

#### 34 **STRENGTHS AND LIMITATIONS:**

- 35 ● Our federated approach avoided privacy concerns and regulatory barriers common in  
36 multicentre studies while facilitating timely international analyses of 83,178 patients  
37 from five countries.
- 38 ● Our common data model along with iterative quality control efforts provide assurance on  
39 harmonized data quality.
- 40 ● The current study may include patients who were either hospitalized due to COVID-19 or  
41 had a positive test for SARS-CoV-2 when admitted for an unrelated medical condition.
- 42 ● For most 4CE participating healthcare systems, we were unable to capture all out-of-  
43 hospital mortality. However, most COVID-19-related mortality among inpatients occurs  
44 in the hospital and many discharged patients have post-discharge follow-up visits, which  
45 allow us to capture 28-day mortality reasonably well.  
46  
47  
48  
49  
50  
51  
52  
53  
54  
55  
56  
57  
58  
59  
60

## INTRODUCTION

---

Mortality rates among hospitalized patients with SARS-CoV-2 infection have decreased over the course of the COVID-19 pandemic [1–3]. It has been hypothesized that this may reflect a higher proportion of younger patients being hospitalized later in the pandemic, but a recently published study reported significant decreases in mortality after stratification by age group [4,5]. A variety of factors are likely responsible, including, but not limited to, improvements in clinical management, resource allocation, and earlier detection of disease [6–12]. There is limited evidence to shed light on these hypotheses; few studies have examined improvements of in-hospital recovery and outcomes over the course of the pandemic. In this international multi-healthcare system retrospective cohort study, we leveraged electronic health records (EHR) data from hospitalized COVID-19 patients to examine temporal shifts in (1) the rate of change for laboratory values towards normal during hospitalization and (2) mortality rates stratified by baseline mortality risk.

## METHODS

---

Individual-level EHR data on hospitalized COVID-19 patients from 18 healthcare systems of the 4CE consortium [13] were extracted and harmonized for this study. Supplementary Table 1 reports further metadata on the participating healthcare systems, which represent 288 hospitals across five countries: France, Germany, Italy, Spain, and the US. Each healthcare system ran the analyses locally and reported summary results to the central institution for federated analyses. Institutional review board approval was obtained at each healthcare system. This study followed the Strengthening the Reporting of Observational Studies in Epidemiology (STROBE) reporting guidelines [14].

### Cohort Identification and Data Collection

1  
2  
3 Our study included 83,178 patients admitted 7 days before to 14 days after the date of their first  
4 positive reverse transcription-polymerase chain reaction SARS-CoV-2 test result recorded in  
5 their EHR. We included patients admitted between March 1, 2020 and January 31, 2021 with  
6 follow-up data up to June 2021.  
7  
8  
9

10  
11 We obtained patient-level data on demographics including age groups (18-25, 26-49, 50-69, 70-  
12 80, 80+), sex, and race; laboratory test values during hospitalization; International Classification  
13 of Disease (ICD) codes, date of discharge, and mortality information. Only US sites reported  
14 race. We calculated the Charlson comorbidity index (CCI) based on ICD codes [15–17]. We  
15 focused on ten laboratory tests: C-reactive protein (CRP), albumin, alanine aminotransferase  
16 (ALT), aspartate aminotransferase (AST), total bilirubin, creatinine, D-dimer, white blood cell  
17 count, lymphocyte count, and neutrophil count [8,18–22]. A schematic of our workflow is  
18 presented in eFigure 1.  
19  
20  
21  
22  
23  
24  
25

### 26 Primary and Secondary Outcomes

27  
28 We defined all-cause mortality up to 28 days after the admission date as the primary outcome  
29 and excluded patients who died on the day of admission in the survival analysis. Each 4CE  
30 healthcare system used local criteria to identify in-hospital mortality. We defined laboratory test  
31 values during hospitalization as secondary outcomes.  
32  
33  
34  
35

### 36 Statistical Analysis

37  
38  
39 To assess temporal changes over the course of the pandemic, we performed stratified analyses by  
40 every two calendar months and between two waves of the pandemic, wherein we defined the first  
41 wave as from March 1 to June 30, 2020 and the second wave as from July 1, 2020 to January 31,  
42 2021.  
43  
44  
45  
46

47 We summarized demographic characteristics, the average CCI at admission, hospitalization  
48 duration, and absolute mortality risk over time. Since the VA population has a distinct  
49 demographic composition, we reported demographic summaries excluding the VA. We further  
50 compared the distributions of admission laboratory values between the two waves.  
51  
52  
53  
54  
55  
56  
57  
58  
59  
60



1  
2  
3 To summarize the laboratory trajectories during hospitalization, we fit log-linear mixed effects  
4 models to the longitudinal laboratory data with cubic splines for time since admission, where we  
5 used three knots at days 3, 7, and 17 in the fixed effects to capture nonlinear trends. Since  
6 laboratory trajectories may vary by how quickly patients recover, we stratified **the**  
7 **trajectory analysis by the hospitalization duration  $\leq 1$  week**, 1-2 weeks,  
8 and 2+ weeks. For each laboratory test, we summarized the *average daily rate of change during*  
9 *the first week of hospitalization* in the first and second waves, denoted by  $R_1$  and  $R_2$ . The  
10 laboratory trajectory analyses only included data from the US, France, and Spain since few  
11 patients from the Germany and Italy sites had repeated laboratory tests.  
12  
13  
14  
15  
16  
17  
18  
19  
20

21 To study temporal changes in mortality risks, we fit LASSO penalized Cox proportional hazard  
22 models for mortality using baseline covariates adjusted for calendar time of the admission date  
23 [23,24]. We considered three sets of covariates: (1) age, sex, and race; (2) the ten laboratory  
24 tests; and (3) CCI. We modeled the calendar time effect using a cubic spline with knots every 2  
25 weeks. We performed a  $\log_e$ -transformation to D-dimer, CRP, and ALT due to the skewness in  
26 their distributions. Due to the high correlation between ALT and AST, we include AST to ALT  
27 ratio (AST/ALT) and  $\log_e$ ALT as measures of liver function [25,26] instead of  $\log_e$ AST and  
28  $\log_e$ ALT. We imputed missing baseline laboratory measures and CCI via the multivariate  
29 imputation by chained equation method and averaged over five imputed sets [27]. The mortality  
30 analyses excluded Italy since a very small number of deaths occurred after April 2020 in the  
31 participating healthcare systems.  
32  
33  
34  
35  
36  
37  
38  
39  
40

41 From a fitted penalized Cox model, we obtained a mortality risk score for each patient given  
42 their baseline covariates. We calculated the area under the receiver operating characteristic curve  
43 (AUC) of the risk score for predicting 28-day mortality [28]. We classified patients into three  
44 mortality risk groups according to their risk score: high risk if score  $> c_{\text{high}}$ , **medium risk if**  
45 **score  $\in (c_{\text{low}}, c_{\text{high}})$** , and low risk if score  $\leq c_{\text{low}}$ . We chose  $c_{\text{low}}$  and  $c_{\text{high}}$  to attain a  
46 sensitivity of 85% ( $c_{\text{low}}$ ) and a specificity of 85% ( $c_{\text{high}}$ ) for predicting 28-day mortality, which  
47 ensures a good separation between the low-risk and high-risk categories. Stratifying by the  
48 calendar time window of the admission date, we calculated the AUC of the risk model, the  
49 proportions of patients belonging to each risk category, and their corresponding mortality risks.  
50  
51  
52  
53  
54  
55  
56  
57  
58  
59  
60



1  
2  
3 The accuracy parameters were estimated via ten-fold cross-validation to correct for overfitting  
4 [29]. We used bootstrap to estimate standard errors [30].  
5  
6

7 Patient-level analyses were performed within each 4CE healthcare system to obtain site-specific  
8 results. We integrate results from all sites using fixed effects meta-analysis. Since the number of  
9 hospitalized patients had a different temporal trend across healthcare systems and across  
10 countries, we assigned the same weight across different calendar months for each healthcare  
11 system to facilitate effective comparisons between waves. All statistical analyses were performed  
12 using R software version 4.0.2.  
13  
14  
15  
16  
17

## 18 **RESULTS**

---

### 19 Characteristics of the Study Cohort

20  
21  
22 The majority of patients were hospitalized March–April 2020 and November 2020 to January  
23 2021 (Figure 1). The most prevalent age group at any time was ages 50–69. In the US—  
24 excluding VA patients which are summarized in eFigure 2—the prevalence of patients who were  
25 White increased (49.1% in March–April 2020 to 64.1% in November 2020–January 2021,  
26  $p<0.001$ ), while the prevalence of patients who were Black decreased (30.0% in March–April  
27 2020 to 17.4% in November 2020–January 2021,  $p<0.001$ ). The average CCI at admission  
28 remained relatively constant across time. The mortality rate decreased from 20.7% in March–  
29 April 2020 to 11.9% in July–August 2020 ( $p<0.001$ ), then increased slightly to 12.4% in  
30 November 2020–January 2021 ( $p<0.001$ ). The temporal shifts in the number of hospitalized  
31 patients, demographics, CCI, and mortality rate were generally consistent across countries  
32 (eFigure 2).  
33  
34  
35  
36  
37  
38  
39  
40  
41  
42  
43

44 As shown in Figure 2, CRP, creatinine, and D-dimer values at admission were lower in the first  
45 wave compared to the second but these differences were not statistically significant. The  
46 between-wave CRP mean difference was higher for France (18.5 mg/dL; 95% CI, 16.5-20.5) and  
47 Spain (8.4 mg/dL; 95% CI, 4.8-12.0) compared to the US (7.5 mg/dL; 95% CI, 6.1-8.8) and  
48 Germany (6.7 mg/dL; 95% CI, -2.5-16.1) (eFigure 3).  
49  
50  
51  
52  
53

### 54 Change in Laboratory Trajectory During Hospitalization

1  
2  
3 Patients' laboratory trajectories during hospitalization improved faster in the second wave  
4 compared to the first (Figure 3). CRP decreased more rapidly ( $R_1 = -4.14$  vs.  $R_2 = -4.72$  mg/dL  
5 per day,  $p = 0.05$ ), while D-dimer increased substantially faster during the first wave but did not  
6 change appreciably during the second ( $R_1 = 21.01$  vs.  $R_2 = 1.25$  ng/dL per day,  $p < 0.001$ ).  
7  
8  
9

10  
11 Hospitalization duration decreased, with 53.4% of patients discharged within 1 week in the  
12 second wave compared to 49.2% in the first ( $p < 0.001$ ). Patients hospitalized for longer generally  
13 had worse laboratory profiles compared to those with shorter stays. The average day-3 CRP  
14 among those hospitalized for  $\leq 1$  week and 2+ weeks was 41.68 and 63.64 mg/dL ( $p < 0.001$ )  
15 during the first wave and 27.33 and 43.52 mg/dL ( $p < 0.001$ ) during the second wave. The  
16 between-wave difference in the rate of decline,  $\Delta_R = R_1 - R_2$ , also varied by the duration of  
17 hospitalization. For CRP,  $\Delta_R$  was 1.01 ( $p < 0.001$ ), 2.04 ( $p < 0.001$ ) and 0.95 ( $p = 0.001$ ) mg/dL per  
18 day among those hospitalized for  $\leq 1$ , 1-2, and 2+ weeks. For creatinine and D-dimer,  $\Delta_R$  had  
19 similar patterns but were not statistically significant.  
20  
21  
22  
23  
24  
25  
26  
27  
28  
29

30 The improvement in laboratory values was more pronounced in the US than in France and Spain  
31 (eFigure 4). For CRP,  $\Delta_R = 1.07$  mg/dL per day (95% CI, 0.86-1.28) in the US, which is  
32 significantly higher than that of France ( $-0.69$  mg/dL per day, 95% CI,  $-1.08$ - 2.92), and Spain  
33 ( $-0.3$  mg/dL per day, 95% CI,  $-0.79$ -0.19). The reduction in hospitalization duration varied  
34 greatly between countries. The higher patients discharged within 1 week increased in the second  
35 wave compared to the first in the US (53.4% vs 61.1%,  $p < 0.001$ ), Italy (2.5% vs 14.9%,  
36  $p < 0.001$ ), Germany (32.7% vs 48.6%,  $p < 0.001$ ), and Spain (57.1% vs 62.3%,  $p < 0.001$ ), but  
37 decreased in France (46.1% vs 42.4%,  $p < 0.001$ ).  
38  
39  
40  
41  
42  
43  
44

#### 45 Temporal Changes in Mortality Risk

46 The factors significantly associated with increased risk of mortality were older age, male sex,  
47 CCI, lower albumin and lymphocyte count, and higher CRP, total bilirubin, white blood cell  
48 count, neutrophil count, D-dimer, ALT, and AST/ALT at baseline (Figure 4). The hazard ratios  
49 of these risk factors did not vary significantly between countries (eFigure 5).  
50  
51  
52  
53  
54  
55  
56  
57  
58  
59  
60

1  
2  
3 Over the course of the pandemic, the models' predictive capabilities did not significantly change  
4 with AUC ranging from 0.752 to 0.787; the temporal patterns were similar across countries  
5 (eFigure 6).  
6  
7  
8  
9

10 The proportion of high-risk patients decreased from March-April 2020 to July-August 2020 but  
11 gradually increased from September 2020 to January 2021 (Figure 5). However, the mortality  
12 rates within each risk category decreased over calendar time, with the decrease from March-  
13 April 2020 to November 2020-January 2021 most substantial in the high-risk category (47.1%  
14 vs. 30.8%,  $p < 0.001$ ), moderate in the intermediate-risk (25.6% vs. 14.8%,  $p < 0.001$ ), and the  
15 low-risk (9.5% vs 4.7%,  $p < 0.001$ ) categories. From March-April 2020 to November 2020-  
16 January 2021, the US had a more consistent decrease over time while France and Spain  
17 decreased from March-April 2020 to July-August 2020 but plateaued afterwards (eFigure 7). In  
18 the high-risk category, the decrease in mortality risk from March-April 2020 to July-August  
19 2020 was the highest in Spain (42.7% vs 25.0%,  $p = 0.002$ ), followed by the US (50.0% vs 38.4%,  
20  $p < 0.001$ ), and France (40.1% vs. 31.7%,  $p = 0.11$ ). By November 2020-January 2021, the  
21 mortality risk further decreased to 29.5% (95% CI, 28.3-30.7) in the US, but slightly increased to  
22 34.9% (95% CI, 31.7-38.0) in France and 28.6% (95% CI, 22.9-34.3) in Spain.  
23  
24  
25  
26  
27  
28  
29  
30  
31  
32  
33  
34

## 35 DISCUSSION

---

36  
37  
38 In this large, international, multi-healthcare system retrospective cohort study, we found that  
39 older age, male sex, higher CCI, low albumin and lymphocyte count values, and higher CRP,  
40 total bilirubin, white blood cell count, neutrophil count, D-dimer, ALT, and AST/ALT were  
41 significantly associated with higher mortality risk across all represented countries. While our  
42 findings corroborate prior observations that male sex, advanced age, and comorbidities are  
43 major risk factors for mortality, we found interesting associations of higher AST/ALT, ALT, and  
44 bilirubin with mortality. While derangements in liver function tests are well described in prior  
45 studies of patients with COVID-19, the patterns of liver dysfunction associated with worse  
46 outcomes are inconsistent [31,32]. Furthermore, these studies tend to be derived from single-  
47 center studies which likely introduce significant sources of bias. In particular, our observation of  
48 a combination of elevated markers of cholestatic liver function (bilirubin, AST/ALT ratio) and  
49  
50  
51  
52  
53  
54  
55  
56  
57  
58  
59  
60

1  
2  
3 inflammatory markers and cell counts suggest cholestatic liver dysfunction may be common in  
4 patients with COVID-19, as is observed in patients who are critically ill [33–35]. Furthermore,  
5 emerging COVID-19 post-mortem studies have suggested that SARS-CoV-2 may directly infect  
6 hepatocytes and lead to altered bile duct morphology, reinforcing the possible role of viral-  
7 induced cholestatic hepatitis in severe COVID-19 [35]. Alternatively, medication-related liver  
8 injury could certainly contribute to liver dysfunction. Future investigations utilizing patient-level  
9 data validated by thorough chart review is warranted to better define these associations.  
10  
11  
12  
13  
14  
15

16  
17 Overall, we observed greater improvements in positive and negative acute phase reactants and  
18 markers of organ function (e.g., creatinine, ALT, and AST) in the second wave compared to the  
19 first, which suggests that systemic inflammation and multiorgan dysfunction all improved faster  
20 in the second wave. Interestingly, we observed a greater improvement in CRP, ALT, AST, and  
21 creatinine in the second wave in patients with longer hospitalizations; while this may be  
22 reflective of a sicker patient population, this could be due to time-dependent (i.e., survivor) bias  
23 [36]. Alternatively, there may have been increased corticosteroid use in patients with severe  
24 COVID-19 in the second wave following preliminary results of the RECOVERY trial, which  
25 may have improved inflammatory markers and mortality [12,37][38]. In addition, there may  
26 have been increased remdesivir in combination with dexamethasone between the first and second  
27 waves that may confound these associations [11,37]. Further studies are warranted to investigate  
28 the alteration of biochemical trajectories of dexamethasone with remdesivir in contrast to  
29 dexamethasone or remdesivir monotherapy [39]. It is also unclear why we observed between-  
30 country differences in the between-wave CRP trajectories, whereas Spain and France had  
31 blunted improvement rates; this could certainly be due to differential clinical management across  
32 countries.  
33  
34  
35  
36  
37  
38  
39  
40  
41  
42  
43  
44  
45

46 One explanation for the blunted D-dimer trajectories in the second wave compared to the first is  
47 increased prophylactic anticoagulation use after the release of International Society on  
48 Thrombosis and Haemostasis guidelines in May and September 2020, which recommended  
49 prophylactic anticoagulation with low-molecular-weight heparin in all hospitalized patients with  
50 COVID-19 who had no anticoagulation contraindications [40]. This may have reduced the higher  
51 incidence of thrombotic events observed in the first wave, which could be associated with high  
52  
53  
54  
55  
56  
57  
58  
59  
60

1  
2  
3 D-dimer levels. Furthermore, as D-dimer is often correlated with disease severity and systemic  
4 inflammation, increased glucocorticoid use in patients with severe disease could blunt increases  
5 in D-dimer [41–44].  
6  
7  
8  
9

10 Despite few changes in patient demographic and clinical profiles at admission, stratified  
11 mortality rates decreased significantly, and patient laboratory profiles displayed faster  
12 physiological recovery. Therefore, our findings cannot be entirely explained by a less vulnerable  
13 and severely ill cohort of patients admitted in the second wave [5,45–47]. Given that no new  
14 major effective pharmacologic therapies were introduced between the first and second waves,  
15 new pharmacologic therapies cannot completely explain these observations[48–57].  
16  
17  
18

19 Alternatively, this may be attributed to changes in indications for admission, inpatient  
20 management strategies, and structural characteristics in the latter stages of the pandemic. For  
21 example, continuous positive airway pressure reduces the need for mechanical ventilation, and  
22 high positive end-expiratory pressure and prone positioning optimizes oxygenation [10,58,59].  
23  
24  
25

26 Further, negative trial data for hydroxychloroquine, azithromycin, and other pharmacologic  
27 agents may have led to reduced usage of these drugs and reduced drug-related adverse effects  
28 over the course of the pandemic [40,55,60–62]. Although there is certainly variability in how  
29 each healthcare system—and each country—adopted new inpatient management strategies, our  
30 results nonetheless suggest that valuable experience was gained to improve patient care.  
31  
32  
33

34 Structurally, hospitals may also have benefited from improved resource allocation strategies and  
35 smaller surges in hospitalizations at any given time [63]. Further investigations into the potential  
36 explanations are warranted as this study was not designed to infer the specific reasons for this  
37 improvement.  
38  
39  
40  
41  
42  
43

44 Although cross-country and cross-healthcare-system heterogeneities exist in demographics and  
45 laboratory distributions, we observed concordant improvement patterns in both laboratory  
46 recovery during hospitalization and mortality risk over time across different countries. However,  
47 the admission profile-adjusted temporal change in mortality risk over calendar months differed  
48 slightly between the US and Europe (Spain and France). In addition to an increase in  
49 hospitalization duration in the latter half of the pandemic in France, in Spain and France the  
50 mortality risk plateaued overall and actually increased in the high-risk group. Further  
51  
52  
53  
54  
55  
56  
57  
58  
59  
60

1  
2  
3 investigation into these between-country differences in mortality using chart review and other  
4 validation steps is warranted.  
5  
6  
7

### 8 Study Strengths and Limitations 9

10 This study has several limitations. First, similar to other EHR-based studies, the current study  
11 may include patients who were either hospitalized due to COVID-19 or had a positive test for  
12 SARS-CoV-2 when admitted for an unrelated medical condition. Second, for most 4CE  
13 participating healthcare systems, we were unable to capture all out-of-hospital mortality.  
14  
15 However, most COVID-19-related mortality among inpatients occurs in the hospital and many  
16 discharged patients have post-discharge follow-up visits, which allow us to capture 28-day  
17 mortality reasonably well. Our study is at risk for time-dependent bias given that we did not  
18 investigate the exact timing of a positive SARS-CoV-2 test relative to admission. This may also  
19 be the case for our results stratified by duration of hospitalization. Future analyses that account  
20 for medication administration and the subsequent effect on inflammatory markers and creatinine  
21 are necessary to infer why these outcomes improved in the second wave.  
22  
23  
24  
25  
26  
27  
28  
29

30  
31 Our federated approach avoided privacy concerns and regulatory barriers common in multicentre  
32 studies while facilitating timely international analyses of 83,178 patients from five countries. Our  
33 common data model along with iterative quality control efforts provide assurance on harmonized  
34 data quality.  
35  
36  
37  
38

### 39 **CONCLUSION** 40

41 Patients' admission profiles did not differ substantially between waves, but there were notable  
42 differences in laboratory recovery rates and mortality in the second wave compared to the first.  
43  
44

---

### 46 **ETHICS STATEMENT** 47 48 49

50 All study sites were responsible for and obtained ethics approval, as needed, from the appropriate  
51 ethics committee at their institution. IRB protocols were reviewed and approved at APHP  
52 (IRB00011591, Project CSE-20-29\_ClinicalCOVID), Bordeaux University Hospital  
53 (Registration #CHUBX2020RE0253), ICSM (Protocol #2518 CE), Mass General Brigham  
54  
55  
56  
57  
58  
59

(IRB#2020P001483), Northwestern University (IRB# STU00212845), University of Kansas (STUDY00146505), University of Freiburg (Application #255/20, Process #210587), and at VA North Atlantic, Southwest, Midwest, Continental, and Pacific (IRB # 3310-x).

The research was determined to be exempt at Hospital Universitario 12 de Octubre (Protocol #20/403), University of Michigan (IRB# HUM00184357), Beth Israel Deaconess Medical Center (IRB# 2020P000565), University of Pittsburgh (STUDY20070095), and University of Pennsylvania (IRB#842813). University of California Los Angeles determined that this study does not need IRB approval because research using limited data sets does not constitute human subjects research.

The lead author affirms that the manuscript is an honest, accurate, and transparent account of the study being reported; that no important aspects of the study have been omitted; and that any discrepancies from the study as originally planned have been explained.

### **FUNDING STATEMENT**

GMW is supported by NIH/NCATS UL1TR002541, NIH/NCATS UL1TR000005, NIH/NLM R01LM013345, and NIH/NHGRI 3U01HG008685-05S2. BWQT is supported by the National Medical Research Council Research Training Fellowship (MOH-000195-00). FJSV is supported by NIH/NCATS UL1TR001881. DAH is supported by NIH/NCATS UL1TR002240. KBW is supported by NIH/NHLBI R01 HL151643-01. SNM is supported by NIH/NCATS 5UL1TR001857-05 and NIH/NHGRI 5R01HG009174-04. NG is supported by NIH/NLM T15 LM007092. GSO is supported by NIH P30ES017885 and U24CA210967. ZX is supported by NIH/NINDS R01NS098023. SV is supported by NIH/NLM R01LM012095 and NIH/NCATS UL1TR001857. LPP is supported by NIH/NCATS CTSA Award #UL1TR002366. DLM is supported by NIH/NCATS CTSA Award #UL1-TR001878. RK is supported by NIH/NCATS CTSA award#UL1TR001998. NGB is supported by the Carlos III Health Institute PI18/00981. AMS is supported by NIH/NHLBI K23HL148394 and L40HL148910 and NIH/NCATS UL1TR001420.

### **DATA SHARING STATEMENT**



1  
2  
3  
4  
5 Only de-identified aggregate data was provided by sites for this study. All aggregate data used  
6 in this study are available for download at [www.covidclinical.net](http://www.covidclinical.net).  
7  
8  
9

## 10 **COMPETING INTEREST STATEMENT**

11  
12  
13 There are no competing interests to report.  
14  
15

### 16 Patient and Public Involvement

17  
18  
19 Patients and the public were not involved in the design, conduct, or reporting, or dissemination  
20 plans of the research.  
21  
22  
23  
24  
25

## 26 **FIGURES and TABLES**

27  
28 Figure 1: Demographic shifts. For demographics variables, we set male sex, age 50-69, and  
29 White race as reference groups.  
30

31  
32 Figure 2: Distribution of laboratory values at admission.  
33

34 Figure 3: Patient-level laboratory recovery rate.  
35

36 Figure 4. Hazard ratio of the Cox model for mortality risk prediction (excluding Italy).  
37

38 Figure 5. Risk model results w/event rate information and risk stratification.  
39  
40  
41  
42  
43  
44  
45

## 46 **REFERENCES**

- 47  
48  
49 1. Horwitz LI, Jones SA, Cerfolio RJ, Francois F, Greco J, Rudy B, et al. Trends in COVID-  
50 19 Risk-Adjusted Mortality Rates. *J Hosp Med*. 2021;16: 90–92. doi:10.12788/jhm.3552  
51  
52 2. Dennis JM, McGovern AP, Vollmer SJ, Mateen BA. Improving Survival of Critical Care  
53 Patients With Coronavirus Disease 2019 in England: A National Cohort Study, March to  
54 June 2020. *Crit Care Med*. 2021;49: 209–214. doi:10.1097/CCM.0000000000004747  
55  
56  
57  
58  
59



3. Asch DA, Sheils NE, Islam MN, Chen Y, Werner RM, Buresh J, et al. Variation in US Hospital Mortality Rates for Patients Admitted With COVID-19 During the First 6 Months of the Pandemic. *JAMA Intern Med.* 2021;181: 471–478. doi:10.1001/jamainternmed.2020.8193
4. Rossen LM, Branum AM, Ahmad FB, Sutton P, Anderson RN. Excess Deaths Associated with COVID-19, by Age and Race and Ethnicity - United States, January 26-October 3, 2020. *MMWR Morb Mortal Wkly Rep.* 2020;69: 1522–1527. doi:10.15585/mmwr.mm6942e2
5. Finelli L, Gupta V, Petigara T, Yu K, Bauer KA, Puzniak LA. Mortality Among US Patients Hospitalized With SARS-CoV-2 Infection in 2020. *JAMA Netw Open.* 2021;4: e216556. doi:10.1001/jamanetworkopen.2021.6556
6. Sun Q, Qiu H, Huang M, Yang Y. Lower mortality of COVID-19 by early recognition and intervention: experience from Jiangsu Province. *Ann Intensive Care.* 2020;10: 33. doi:10.1186/s13613-020-00650-2
7. Wang D, Hu B, Hu C, Zhu F, Liu X, Zhang J, et al. Clinical Characteristics of 138 Hospitalized Patients With 2019 Novel Coronavirus-Infected Pneumonia in Wuhan, China. *JAMA.* 2020;323: 1061–1069. doi:10.1001/jama.2020.1585
8. Huang C, Wang Y, Li X, Ren L, Zhao J, Hu Y, et al. Clinical features of patients infected with 2019 novel coronavirus in Wuhan, China. *The Lancet.* 2020. pp. 497–506. doi:10.1016/s0140-6736(20)30183-5
9. Goyal DK, Mansab F, Iqbal A, Bhatti S. Early intervention likely improves mortality in COVID-19 infection. *Clin Med .* 2020. doi:10.7861/clinmed.2020-0214
10. Mittermaier M, Pickerodt P, Kurth F, de Jarcy LB, Uhrig A, Garcia C, et al. Evaluation of PEEP and prone positioning in early COVID-19 ARDS. *EclinicalMedicine.* 2020;28: 100579. doi:10.1016/j.eclinm.2020.100579
11. Beigel JH, Tomashek KM, Dodd LE, Mehta AK, Zingman BS, Kalil AC, et al. Remdesivir for the Treatment of Covid-19 - Final Report. *N Engl J Med.* 2020;383: 1813–1826. doi:10.1056/NEJMoa2007764
12. WHO Rapid Evidence Appraisal for COVID-19 Therapies (REACT) Working Group, Sterne JAC, Murthy S, Diaz JV, Slutsky AS, Villar J, et al. Association Between Administration of Systemic Corticosteroids and Mortality Among Critically Ill Patients With COVID-19: A Meta-analysis. *JAMA.* 2020;324: 1330–1341. doi:10.1001/jama.2020.17023
13. Brat GA, Weber GM, Gehlenborg N, Avillach P, Palmer NP, Chiovato L, et al. International electronic health record-derived COVID-19 clinical course profiles: the 4CE consortium. *NPJ Digit Med.* 2020;3: 109. doi:10.1038/s41746-020-00308-0
14. von Elm E, Altman DG, Egger M, Pocock SJ, Gøtzsche PC, Vandenbroucke JP, et al. The

- 1  
2  
3 Strengthening the Reporting of Observational Studies in Epidemiology (STROBE)  
4 statement: guidelines for reporting observational studies. *Lancet*. 2007;370: 1453–1457.  
5 doi:10.1016/S0140-6736(07)61602-X  
6  
7  
8 15. Deyo R. Adapting a clinical comorbidity index for use with ICD-9-CM administrative  
9 databases. *Journal of Clinical Epidemiology*. 1992. pp. 613–619. doi:10.1016/0895-  
10 4356(92)90133-8  
11  
12 16. Quan H, Sundararajan V, Halfon P, Fong A, Burnand B, Luthi J-C, et al. Coding algorithms  
13 for defining comorbidities in ICD-9-CM and ICD-10 administrative data. *Med Care*.  
14 2005;43: 1130–1139. doi:10.1097/01.mlr.0000182534.19832.83  
15  
16 17. Ladha KS, Zhao K, Quraishi SA, Kurth T, Eikermann M, Kaafarani HMA, et al. The Deyo-  
17 Charlson and Elixhauser-van Walraven Comorbidity Indices as predictors of mortality in  
18 critically ill patients. *BMJ Open*. 2015;5: e008990. doi:10.1136/bmjopen-2015-008990  
19  
20  
21 18. Ghahramani S, Tabrizi R, Lankarani KB, Kashani SMA, Rezaei S, Zeidi N, et al.  
22 Laboratory features of severe vs. non-severe COVID-19 patients in Asian populations: a  
23 systematic review and meta-analysis. *Eur J Med Res*. 2020;25: 30. doi:10.1186/s40001-020-  
24 00432-3  
25  
26 19. Huang I, Pranata R, Lim MA, Oehadian A, Alisjahbana B. C-reactive protein, procalcitonin,  
27 D-dimer, and ferritin in severe coronavirus disease-2019: a meta-analysis. *Ther Adv Respir*  
28 *Dis*. 2020;14: 1753466620937175. doi:10.1177/1753466620937175  
29  
30  
31 20. Smilowitz NR, Kunichoff D, Garshick M, Shah B, Pillinger M, Hochman JS, et al. C-  
32 reactive protein and clinical outcomes in patients with COVID-19. *Eur Heart J*. 2021;42:  
33 2270–2279. doi:10.1093/eurheartj/ehaa1103  
34  
35 21. Shi S, Nie B, Chen X, Cai Q, Lin C, Zhao G, et al. Clinical and laboratory characteristics of  
36 severe and non-severe patients with COVID-19: A retrospective cohort study in China. *J*  
37 *Clin Lab Anal*. 2021;35: e23692. doi:10.1002/jcla.23692  
38  
39  
40 22. Wang F, Hou H, Wang T, Luo Y, Tang G, Wu S, et al. Establishing a model for predicting  
41 the outcome of COVID-19 based on combination of laboratory tests. *Travel Med Infect Dis*.  
42 2020;36: 101782. doi:10.1016/j.tmaid.2020.101782  
43  
44 23. Simon N, Friedman J, Hastie T, Tibshirani R. Regularization Paths for Cox's Proportional  
45 Hazards Model via Coordinate Descent. *Journal of Statistical Software*. 2011.  
46 doi:10.18637/jss.v039.i05  
47  
48 24. Tibshirani R. The lasso method for variable selection in the Cox model. *Stat Med*. 1997;16:  
49 385–395. doi:10.1002/(sici)1097-0258(19970228)16:4<385::aid-sim380>3.0.co;2-3  
50  
51  
52 25. Williams AL, Hoofnagle JH. Ratio of serum aspartate to alanine aminotransferase in  
53 chronic hepatitis. Relationship to cirrhosis. *Gastroenterology*. 1988;95: 734–739.  
54 doi:10.1016/s0016-5085(88)80022-2  
55  
56  
57  
58  
59

- 1
  - 2
  - 3
  - 4
  - 5
  - 6
  - 7
  - 8
  - 9
  - 10
  - 11
  - 12
  - 13
  - 14
  - 15
  - 16
  - 17
  - 18
  - 19
  - 20
  - 21
  - 22
  - 23
  - 24
  - 25
  - 26
  - 27
  - 28
  - 29
  - 30
  - 31
  - 32
  - 33
  - 34
  - 35
  - 36
  - 37
  - 38
  - 39
  - 40
  - 41
  - 42
  - 43
  - 44
  - 45
  - 46
  - 47
  - 48
  - 49
  - 50
  - 51
  - 52
  - 53
  - 54
  - 55
  - 56
  - 57
  - 58
  - 59
  - 60
26. Hall P, Cash J. What is the real function of the liver “function” tests? *Ulster Med J*. 2012;81: 30–36. Available: <https://www.ncbi.nlm.nih.gov/pubmed/23536736>
27. van Buuren S, Groothuis-Oudshoorn K. mice: Multivariate Imputation by Chained Equations in R. *J Stat Softw*. 2011;45. doi:10.18637/jss.v045.i03
28. Uno H, Cai T, Tian L, Wei LJ. Evaluating Prediction Rules for t-Year Survivors With Censored Regression Models. *J Am Stat Assoc*. 2007;102: 527–537. doi:10.1198/016214507000000149
29. Stone M. Cross-validatory choice and assessment of statistical predictions. *J R Stat Soc*. 1974;36: 111–133. doi:10.1111/j.2517-6161.1974.tb00994.x
30. Efron B, Tibshirani RJ. *An Introduction to the Bootstrap*. CRC Press; 1994. Available: <https://play.google.com/store/books/details?id=gLlpIUxRntoC>
31. Yu D, Du Q, Yan S, Guo X-G, He Y, Zhu G, et al. Liver injury in COVID-19: clinical features and treatment management. *Virology*. 2021;18: 121. doi:10.1186/s12985-021-01593-1
32. Cai Q, Huang D, Yu H, Zhu Z, Xia Z, Su Y, et al. COVID-19: Abnormal liver function tests. *J Hepatol*. 2020;73: 566–574. doi:10.1016/j.jhep.2020.04.006
33. Jenniskens M, Langouche L, Vanwijngaerden Y-M, Mesotten D, Van den Berghe G. Cholestatic liver (dys)function during sepsis and other critical illnesses. *Intensive Care Med*. 2016;42: 16–27. doi:10.1007/s00134-015-4054-0
34. Cardoso FS, Pereira R, Germano N. Liver injury in critically ill patients with COVID-19: a case series. *Crit Care*. 2020;24: 190. doi:10.1186/s13054-020-02924-4
35. Lagana SM, Kudose S, Iuga AC, Lee MJ, Fazlollahi L, Remotti HE, et al. Hepatic pathology in patients dying of COVID-19: a series of 40 cases including clinical, histologic, and virologic data. *Mod Pathol*. 2020;33: 2147–2155. doi:10.1038/s41379-020-00649-x
36. Cohen JB, D’Agostino McGowan L, Jensen ET, Rigdon J, South AM. Evaluating sources of bias in observational studies of angiotensin-converting enzyme inhibitor/angiotensin II receptor blocker use during COVID-19: beyond confounding. *J Hypertens*. 2021;39: 795–805. doi:10.1097/HJH.0000000000002706
37. RECOVERY Collaborative Group, Horby P, Lim WS, Emberson JR, Mafham M, Bell JL, et al. Dexamethasone in Hospitalized Patients with Covid-19. *N Engl J Med*. 2021;384: 693–704. doi:10.1056/NEJMoa2021436
38. Kim W-Y, Kweon OJ, Cha MJ, Baek MS, Choi S-H. Dexamethasone may improve severe COVID-19 via ameliorating endothelial injury and inflammation: A preliminary pilot study. *PLoS One*. 2021;16: e0254167. doi:10.1371/journal.pone.0254167
39. Garibaldi BT, Wang K, Robinson ML, Zeger SL, Bandeen-Roche K, Wang M-C, et al.

- 1  
2  
3 Comparison of Time to Clinical Improvement With vs Without Remdesivir Treatment in  
4 Hospitalized Patients With COVID-19. *JAMA Netw Open*. 2021;4: e213071.  
5 doi:10.1001/jamanetworkopen.2021.3071  
6
- 7  
8 40. Thachil J, Juffermans NP, Ranucci M, Connors JM, Warkentin TE, Ortel TL, et al. ISTH  
9 DIC subcommittee communication on anticoagulation in COVID-19. *J Thromb Haemost*.  
10 2020;18: 2138–2144. doi:10.1111/jth.15004  
11
- 12 41. Helms J, Tacquard C, Severac F, Leonard-Lorant I, Ohana M, Delabranche X, et al. High  
13 risk of thrombosis in patients with severe SARS-CoV-2 infection: a multicenter prospective  
14 cohort study. *Intensive Care Med*. 2020;46: 1089–1098. doi:10.1007/s00134-020-06062-x  
15
- 16 42. Poissy J, Goutay J, Caplan M, Parmentier E, Duburcq T, Lassalle F, et al. Pulmonary  
17 Embolism in Patients With COVID-19: Awareness of an Increased Prevalence. *Circulation*.  
18 2020;142: 184–186. doi:10.1161/CIRCULATIONAHA.120.047430  
19
- 20 43. Criel M, Falter M, Jaeken J, Van Kerrebroeck M, Lefere I, Meylaerts L, et al. Venous  
21 thromboembolism in SARS-CoV-2 patients: only a problem in ventilated ICU patients, or is  
22 there more to it? *Eur Respir J*. 2020;56. doi:10.1183/13993003.01201-2020  
23
- 24 44. Yu B, Li X, Chen J, Ouyang M, Zhang H, Zhao X, et al. Evaluation of variation in D-dimer  
25 levels among COVID-19 and bacterial pneumonia: a retrospective analysis. *J Thromb*  
26 *Thrombolysis*. 2020;50: 548–557. doi:10.1007/s11239-020-02171-y  
27
- 28 45. Docherty AB, Mulholland RH, Lone NI, Cheyne CP, De Angelis D, Diaz-Ordaz K, et al.  
29 Changes in in-hospital mortality in the first wave of COVID-19: a multicentre prospective  
30 observational cohort study using the WHO Clinical Characterisation Protocol UK. *Lancet*  
31 *Respir Med*. 2021. doi:10.1016/S2213-2600(21)00175-2  
32
- 33 46. Doidge JC, Gould DW, Ferrando-Vivas P, Mouncey PR, Thomas K, Shankar-Hari M, et al.  
34 Trends in Intensive Care for Patients with COVID-19 in England, Wales, and Northern  
35 Ireland. *Am J Respir Crit Care Med*. 2021;203: 565–574. doi:10.1164/rccm.202008-  
36 3212OC  
37
- 38 47. Vahidy FS, Drews AL, Masud FN, Schwartz RL, Askary BB, Boom ML, et al.  
39 Characteristics and Outcomes of COVID-19 Patients During Initial Peak and Resurgence in  
40 the Houston Metropolitan Area. *JAMA*. 2020;324: 998–1000.  
41 doi:10.1001/jama.2020.15301  
42
- 43 48. WHO Solidarity trial consortium, Pan H, Peto R, Karim QA, Alejandria M, Henao-Restrepo  
44 AM, et al. Repurposed antiviral drugs for COVID-19 –interim WHO SOLIDARITY trial  
45 results. *bioRxiv*. medRxiv; 2020. doi:10.1101/2020.10.15.20209817  
46
- 47 49. Sanders JM, Monogue ML, Jodlowski TZ, Cutrell JB. Pharmacologic Treatments for  
48 Coronavirus Disease 2019 (COVID-19): A Review. *JAMA*. 2020;323: 1824–1836.  
49 doi:10.1001/jama.2020.6019  
50
- 51 50. Sheahan TP, Sims AC, Leist SR, Schäfer A, Won J, Brown AJ, et al. Comparative  
52  
53  
54  
55  
56  
57  
58  
59  
60

- therapeutic efficacy of remdesivir and combination lopinavir, ritonavir, and interferon beta against MERS-CoV. *Nat Commun.* 2020;11: 222. doi:10.1038/s41467-019-13940-6
51. Gautret P, Lagier J-C, Parola P, Hoang VT, Meddeb L, Mailhe M, et al. Hydroxychloroquine and azithromycin as a treatment of COVID-19: results of an open-label non-randomized clinical trial. *Int J Antimicrob Agents.* 2020;56: 105949. doi:10.1016/j.ijantimicag.2020.105949
  52. Spinner CD, Gottlieb RL, Criner GJ, Arribas López JR, Cattelan AM, Soriano Viladomiu A, et al. Effect of Remdesivir vs Standard Care on Clinical Status at 11 Days in Patients With Moderate COVID-19: A Randomized Clinical Trial. *JAMA.* 2020;324: 1048–1057. doi:10.1001/jama.2020.16349
  53. Wang Y, Zhang D, Du G, Du R, Zhao J, Jin Y, et al. Remdesivir in adults with severe COVID-19: a randomised, double-blind, placebo-controlled, multicentre trial. *Lancet.* 2020;395: 1569–1578. doi:10.1016/S0140-6736(20)31022-9
  54. Boulware DR, Pullen MF, Bangdiwala AS, Pastick KA, Lofgren SM, Okafor EC, et al. A Randomized Trial of Hydroxychloroquine as Postexposure Prophylaxis for Covid-19. *N Engl J Med.* 2020;383: 517–525. doi:10.1056/NEJMoa2016638
  55. Mitjà O, Corbacho-Monné M, Ubals M, Alemany A, Suñer C, Tebé C, et al. A Cluster-Randomized Trial of Hydroxychloroquine for Prevention of Covid-19. *N Engl J Med.* 2021;384: 417–427. doi:10.1056/NEJMoa2021801
  56. Self WH, Semler MW, Leither LM, Casey JD, Angus DC, Brower RG, et al. Effect of Hydroxychloroquine on Clinical Status at 14 Days in Hospitalized Patients With COVID-19: A Randomized Clinical Trial. *JAMA.* 2020;324: 2165–2176. doi:10.1001/jama.2020.22240
  57. WHO Solidarity Trial Consortium, Pan H, Peto R, Henao-Restrepo A-M, Preziosi M-P, Sathiyamoorthy V, et al. Repurposed Antiviral Drugs for Covid-19 - Interim WHO Solidarity Trial Results. *N Engl J Med.* 2021;384: 497–511. doi:10.1056/NEJMoa2023184
  58. Mahase E. Covid-19: CPAP reduces need for invasive mechanical ventilation in patients requiring oxygen, study finds. *BMJ.* 2021;374: n1950. doi:10.1136/bmj.n1950
  59. Perkins GD, Ji C, Connolly BA, Couper K, Lall R, Baillie JK, et al. An adaptive randomized controlled trial of non-invasive respiratory strategies in acute respiratory failure patients with COVID-19. *bioRxiv. medRxiv;* 2021. doi:10.1101/2021.08.02.21261379
  60. Cavalcanti AB, Zampieri FG, Rosa RG, Azevedo LCP, Veiga VC, Avezum A, et al. Hydroxychloroquine with or without Azithromycin in Mild-to-Moderate Covid-19. *N Engl J Med.* 2020;383: 2041–2052. doi:10.1056/NEJMoa2019014
  61. RECOVERY Collaborative Group, Horby P, Mafham M, Linsell L, Bell JL, Staplin N, et al. Effect of Hydroxychloroquine in Hospitalized Patients with Covid-19. *N Engl J Med.* 2020;383: 2030–2040. doi:10.1056/NEJMoa2022926

- 1  
2  
3 62. Thachil J, Tang N, Gando S, Falanga A, Cattaneo M, Levi M, et al. ISTH interim guidance  
4 on recognition and management of coagulopathy in COVID-19. *J Thromb Haemost*.  
5 2020;18: 1023–1026. doi:10.1111/jth.14810  
6  
7  
8 63. Weber GM, Zhang HG, L'Yi S, Bonzel C-L, Hong C, Avillach P, et al. International  
9 changes in COVID-19 clinical trajectories across 315 hospitals and 6 countries: A 4CE  
10 consortium study (preprint). *JMIR Preprints*. 2021. doi:10.2196/preprints.31400  
11  
12  
13  
14  
15  
16  
17  
18  
19  
20  
21  
22  
23  
24  
25  
26  
27  
28  
29  
30  
31  
32  
33  
34  
35  
36  
37  
38  
39  
40  
41  
42  
43  
44  
45  
46  
47  
48  
49  
50  
51  
52  
53  
54  
55  
56  
57  
58  
59  
60



**Figure 1: Demographic shifts. For demographics variables, we set male sex, age 50-69, and White race as reference groups.**

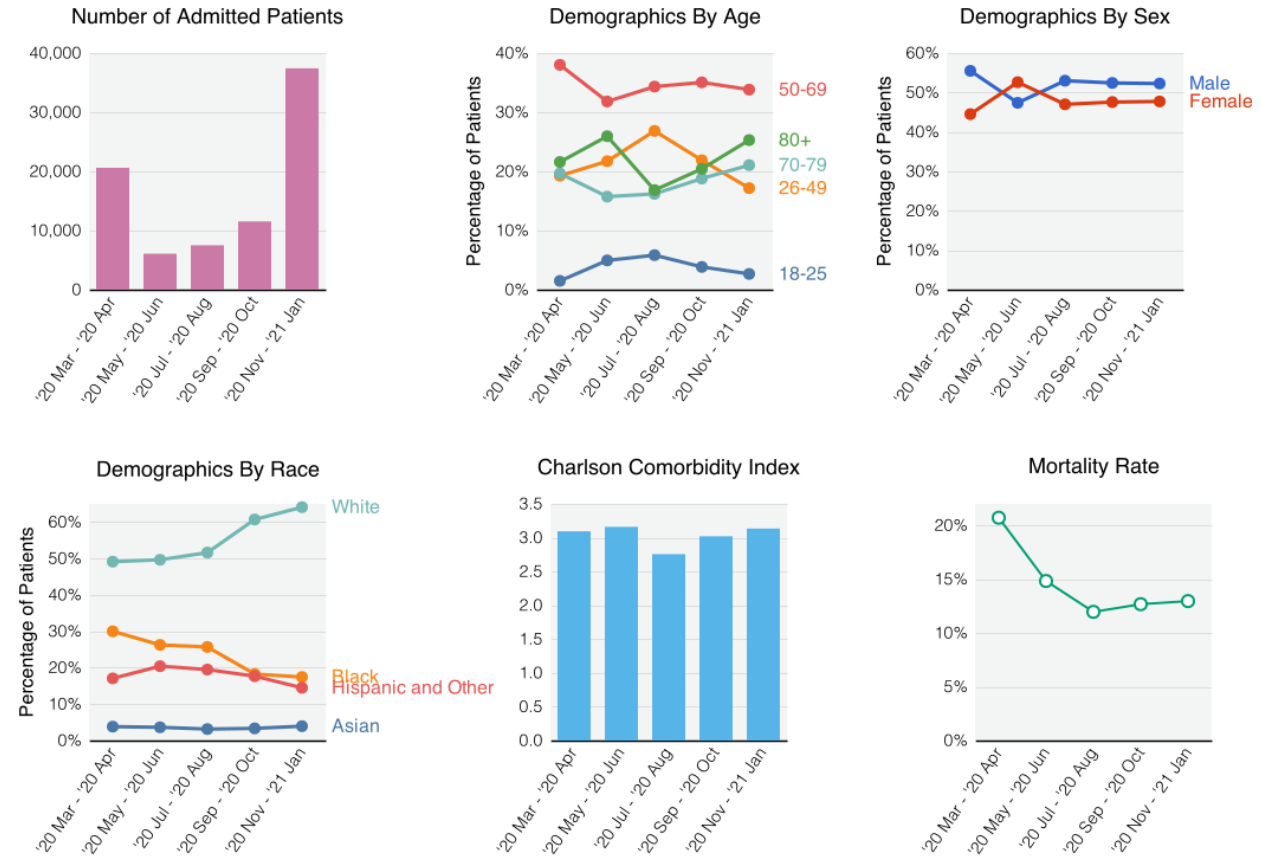

**Figure 2: Distribution of laboratory values at admission.**

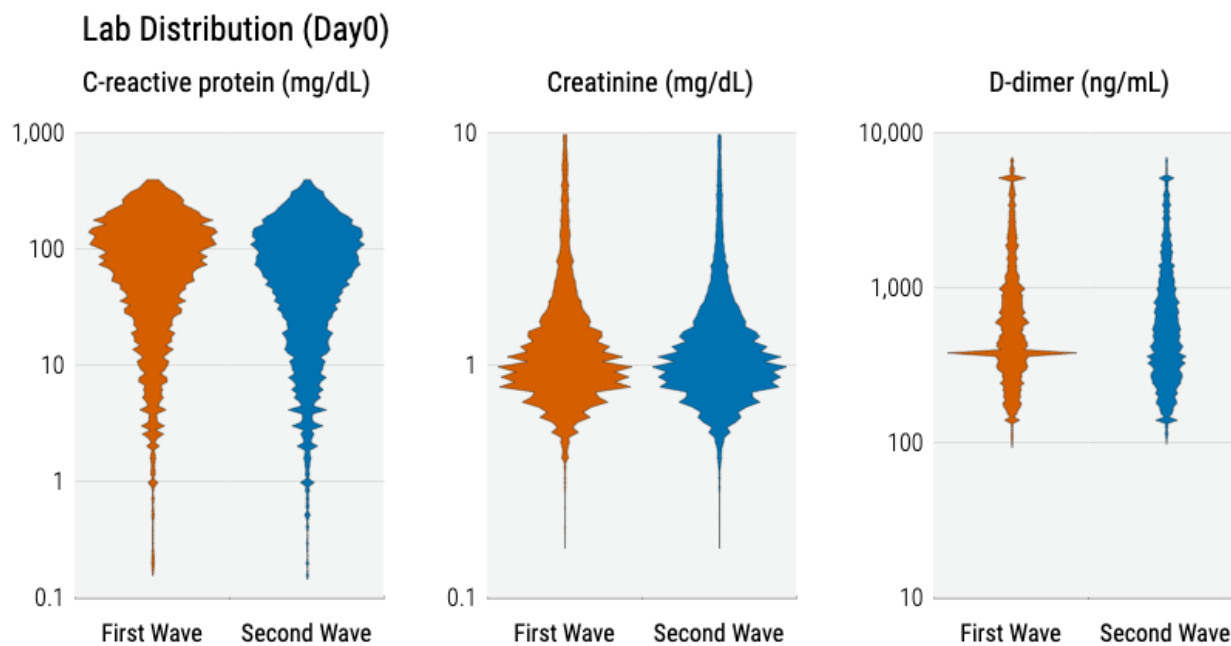

er review only



**Figure 3: Patient-level laboratory recovery rate.**

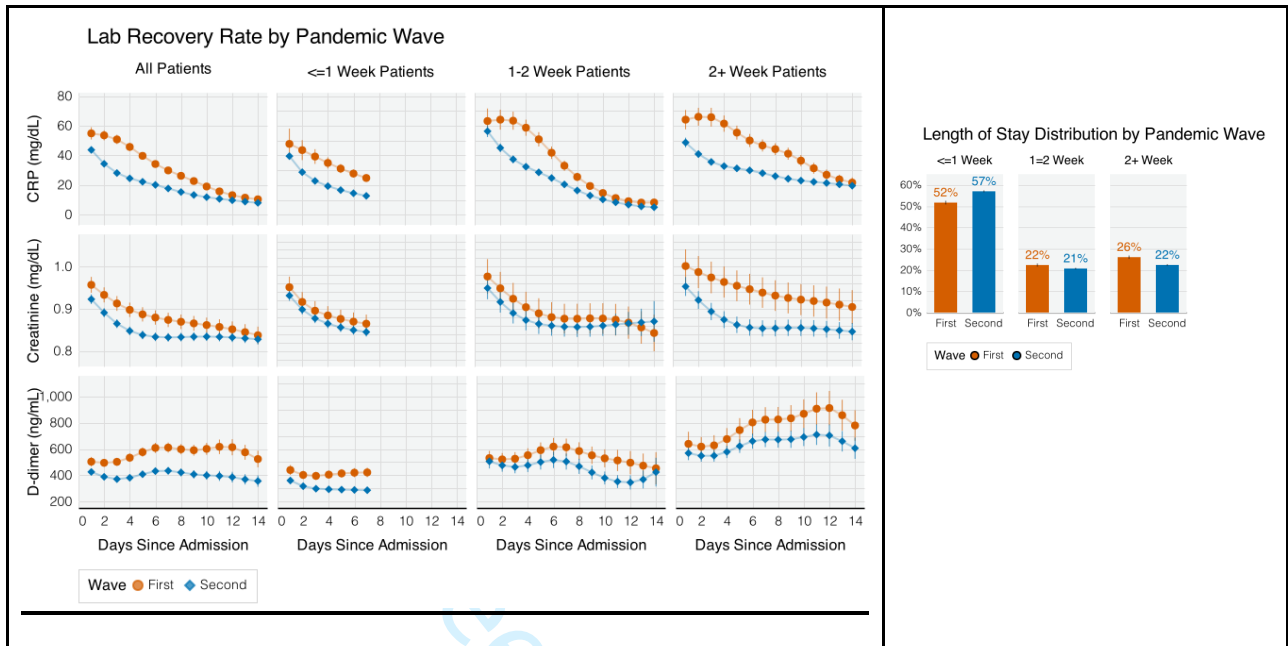

**Figure 4. Hazard ratio of the Cox model for mortality risk prediction (excluding Italy)**

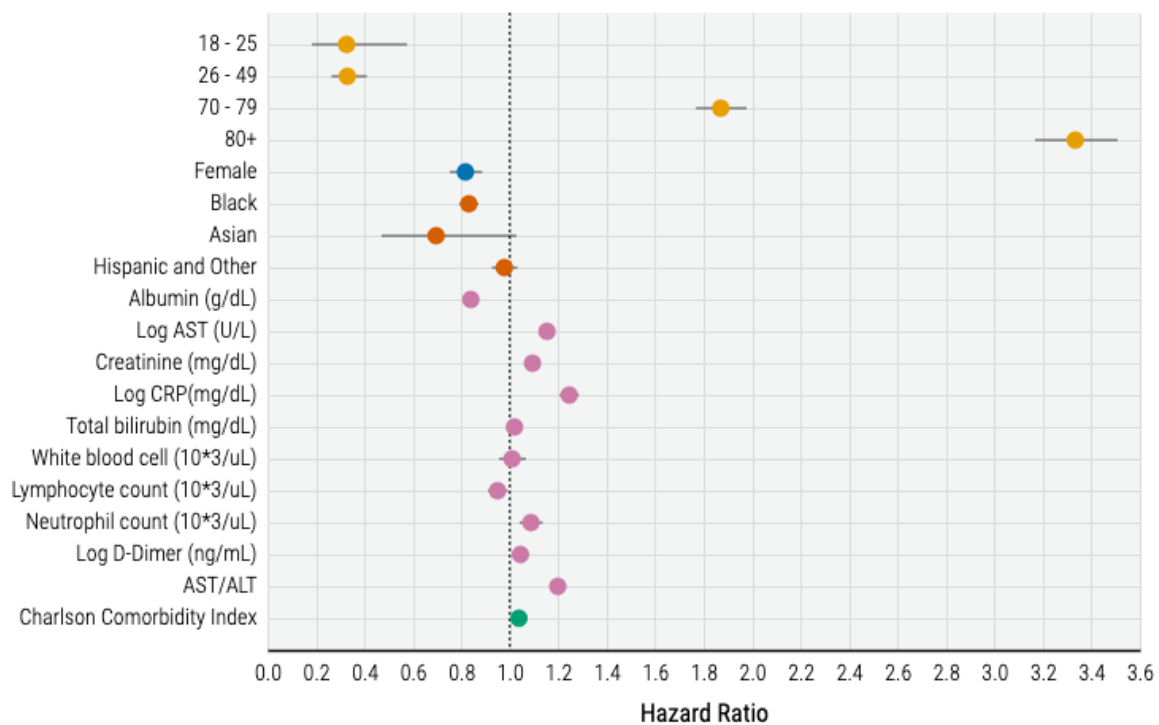

review only

**Figure 5: Risk model results w/event rate information and risk stratification.**

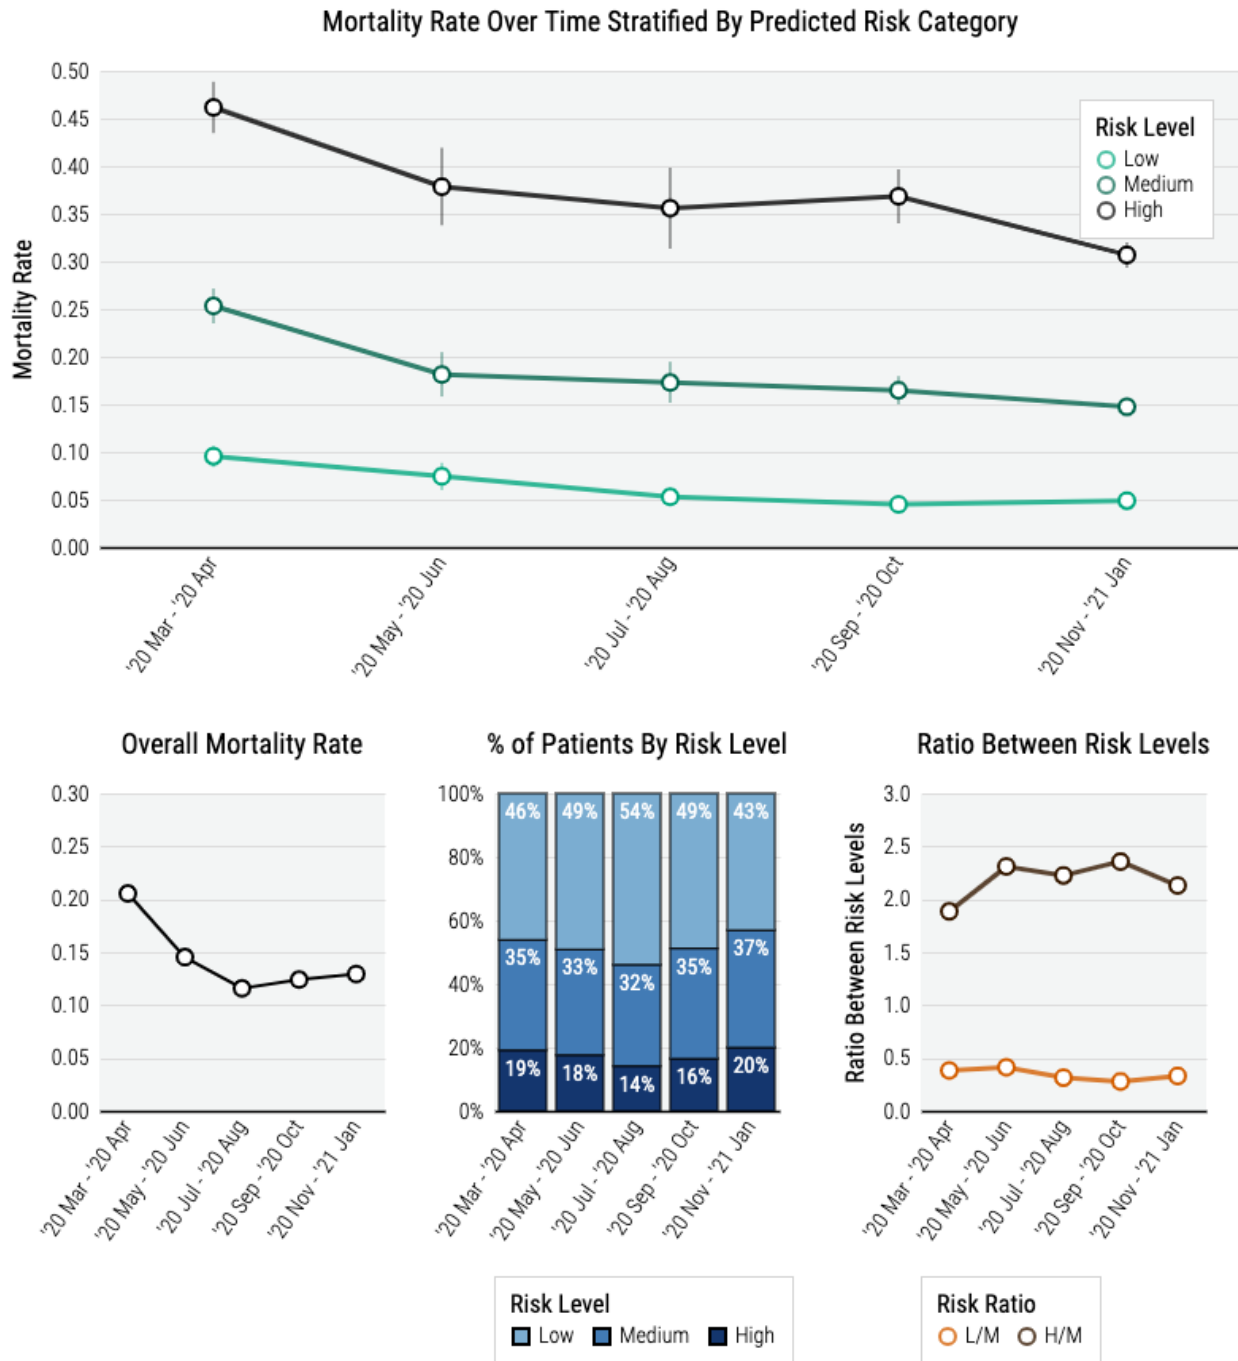

## SUPPLEMENTARY FIGURES

---

Supplementary eTable 1: Participating hospitals.

Supplementary eFigure 1: Schematic of the federated EHR-based study involving healthcare systems from five countries.

Supplementary eFigure 2: Country-level demographic shifts.

Supplementary eFigure 3: Country-level Distribution of laboratory values at admission.

Supplementary eFigure 4: Patient-level laboratory recovery rate. (a) country-level changes in the recovery rates of laboratory measures (excluding Germany and Italy due to the small number of patients with longitudinal laboratory measurements available); (b) distribution of length of hospital stay among patients admitted in the first wave and in the second wave.

Supplementary eFigure 5: Country-level hazard ratio of the Cox model for mortality risk prediction (excluding Italy).

Supplementary eFigure 6. AUC of the Cox regression model for mortality risk prediction (excluding Italy).

Supplementary eFigure 7: Country-level risk model results w/ event rate information and risk stratification (excluding Italy).

**eTable 1: Participating healthcare systems. The 170 US Veterans Affairs (VA) hospitals were grouped into 5 regional healthcare systems [1].**

| Healthcare system                          | Acronym | Country | City                          | Hospitals | Beds   | Inpatient discharges/year |
|--------------------------------------------|---------|---------|-------------------------------|-----------|--------|---------------------------|
| Assistance Publique - Hôpitaux de Paris    | APHP    | France  | Paris                         | 39        | 20 098 | 1 375 538                 |
| Beth Israel Deaconess Medical Center       | BIDMC   | USA     | Boston, MA                    | 1         | 673    | 40 752                    |
| Bordeaux University Hospital               | FRBDX   | France  | Bordeaux                      | 3         | 2 676  | 130 033                   |
| Hospital Universitario 12 de Octubre       | H12O    | Spain   | Madrid                        | 1         | 1 256  | 45 035                    |
| ICSM Hospitals                             | ICSM    | Italy   | Pavia/Milan/Lumezzane/Brescia | 3         | 775    | 12 344                    |
| Mass General Brigham (Partners Healthcare) | MGB     | USA     | Boston, MA                    | 10        | 3 418  | 163 521                   |
| Northwestern University                    | NWU     | USA     | Chicago, IL                   | 10        | 2 234  | 103 279                   |
| University of California, LA               | UCLA    | USA     | Los Angeles, CA               | 2         | 786    | 40 526                    |
| University of Kansas Medical Center        | KUMC    | USA     | Kansas City, KS               | 1         | 794    | 54 659                    |
| University of Freiburg, Medical Center     | UKFR    | Germany | Freiburg                      | 1         | 1 660  | 71 500                    |
| University of Michigan                     | UMICH   | USA     | Ann Arbor, MI                 | 3         | 1000   | 49 008                    |
| University of Pennsylvania                 | UPENN   | USA     | Philadelphia, PA              | 5         | 2 469  | 118 188                   |
| University of Pittsburgh                   | UPITT   | USA     | Pittsburgh, PA                | 39        | 8 085  | 369 300                   |
| VA North Atlantic                          | VA1     | USA     |                               | 49        | 3 594  | 151 075                   |
| VA Southwest                               | VA2     | USA     |                               | 29        | 3 115  | 156 315                   |
| VA Midwest                                 | VA3     | USA     |                               | 39        | 2 686  | 145 468                   |
| VA Continental                             | VA4     | USA     |                               | 24        | 2 110  | 113 260                   |
| VA Pacific                                 | VA5     | USA     |                               | 29        | 2 296  | 114 569                   |
| Total                                      |         |         |                               | 288       | 59 725 | 3 254 370                 |

eFigure 1. Schematic of the federated EHR-based study involving healthcare systems from five countries. (created with BioRender.com )

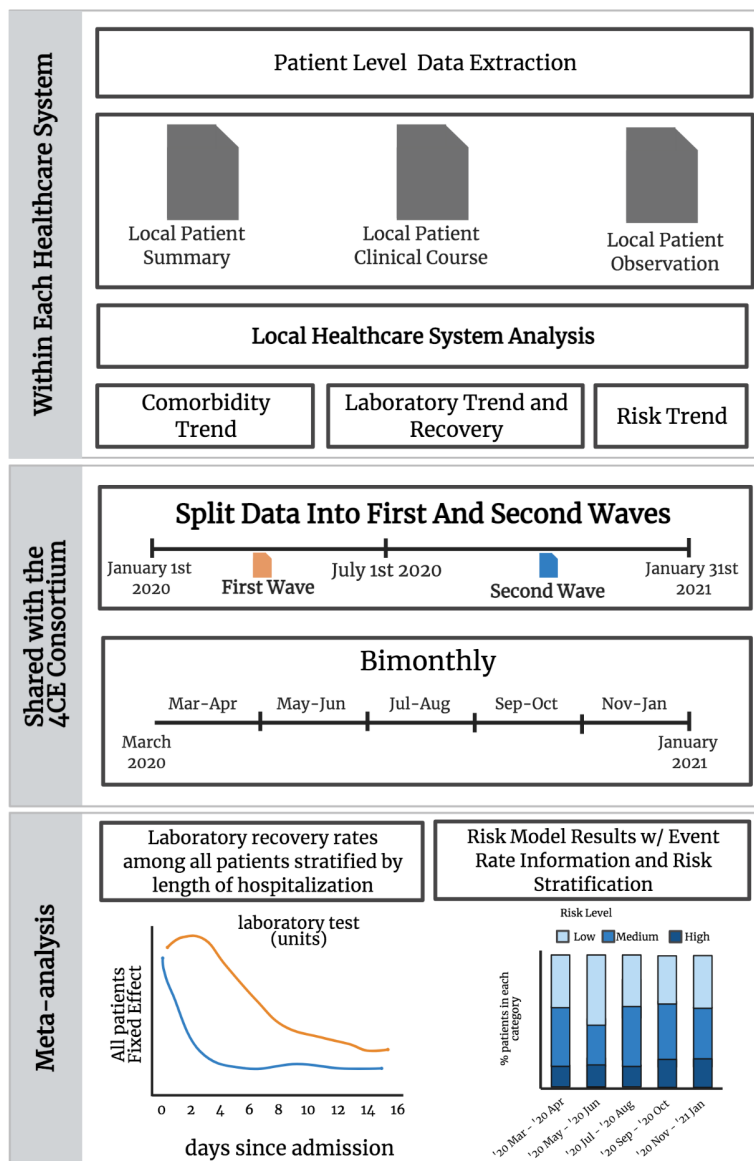

Remark: The hospitalization rate over time tends to differ across regions and across countries, in part due to heterogeneity in a wide range of regional factors including community morbidity and local social distancing policy. This results in different relative sample sizes across healthcare centers over time. To ensure that the temporal trends in clinical presentations summarized via meta-analysis combining all healthcare centers are not driven by the temporal change in the relative sample sizes, we used the same weight for each healthcare center across different calendar months.

eFigure 2. Country-level demographic shifts.

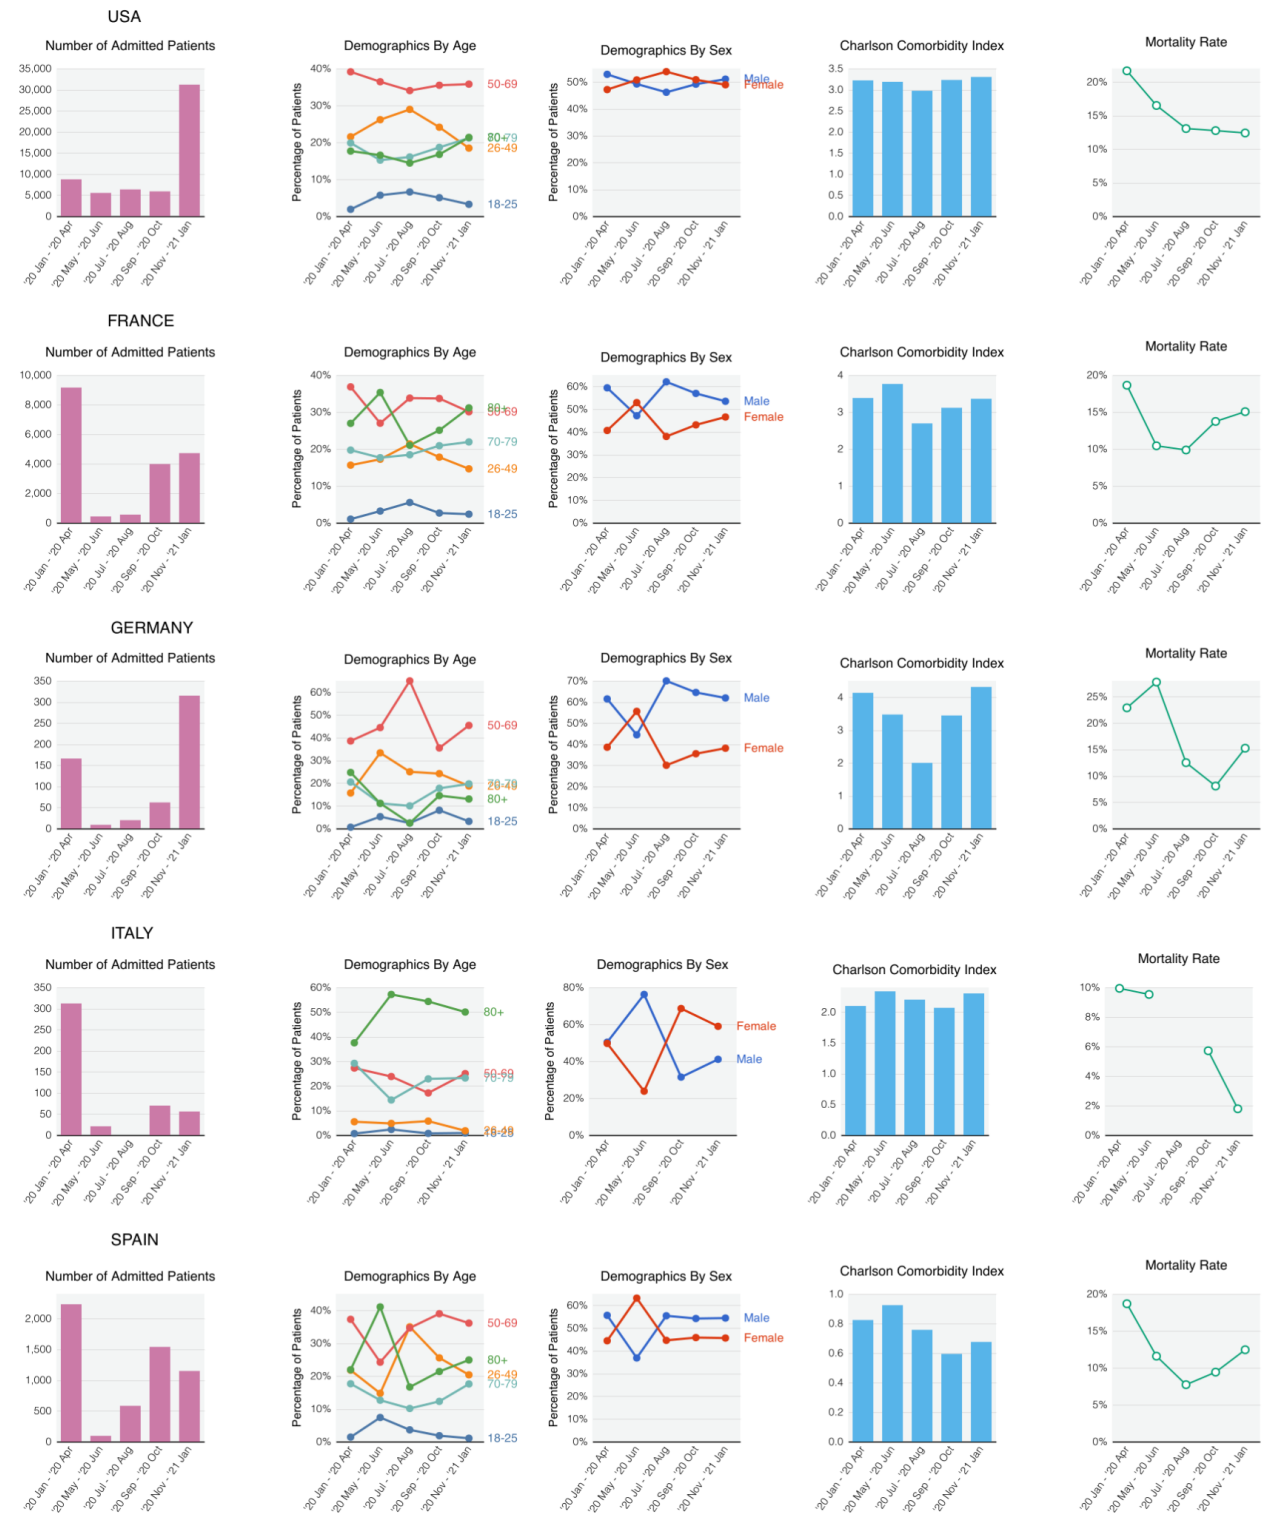

eFigure 3. Country-level Distribution of laboratory values at admission. The Italy site had a relatively low percentage of patients with laboratory measurements which may have led to less precise estimates in these laboratory changes.

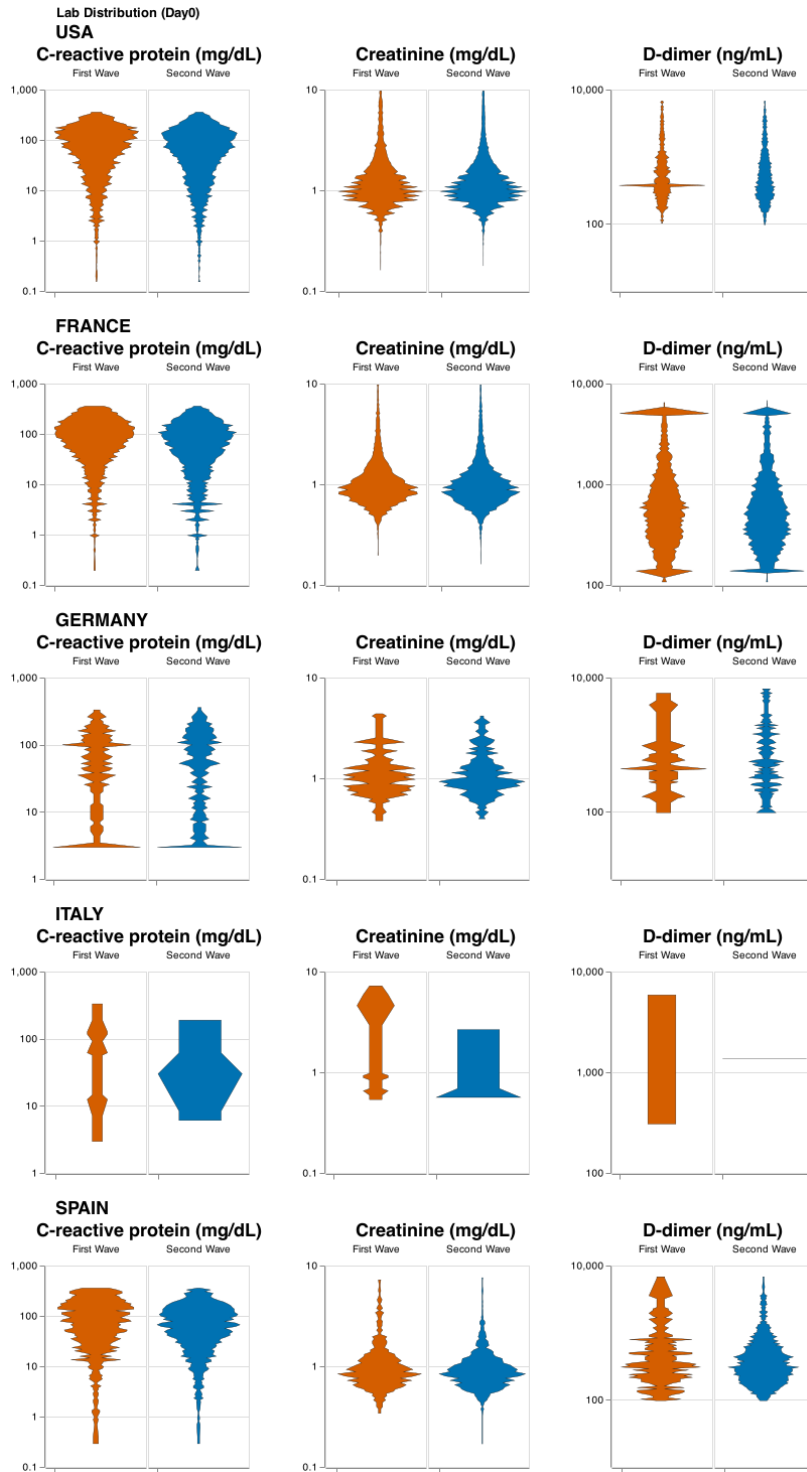



eFigure 4. Patient-level laboratory recovery rate. (a) country-level changes in the recovery rates of laboratory measures (excluding Germany and Italy due to the small number of patients with longitudinal laboratory measurements available); (b) distribution of length of hospital stay among patients admitted in the first wave and in the second wave

(a) country-level changes in the recovery rates of laboratory measures

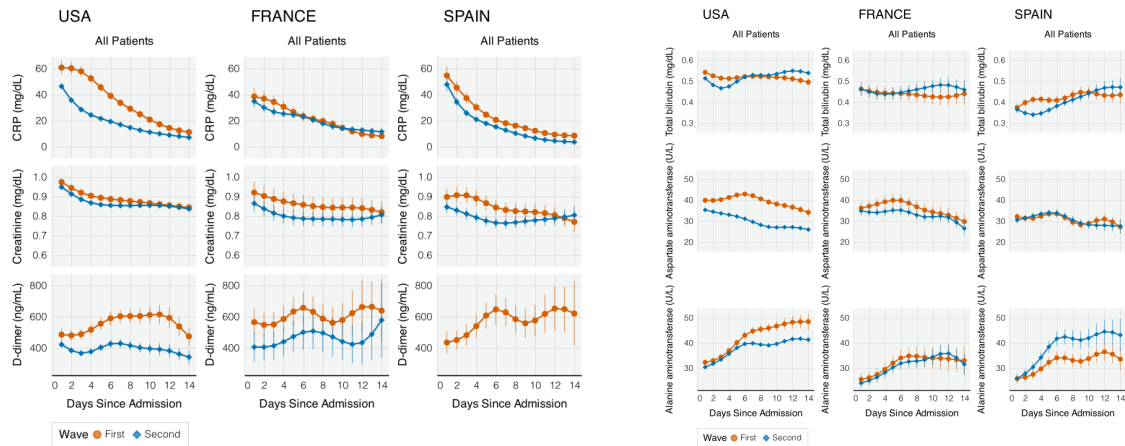

(b) Distribution of length of hospital stay among patients admitted in the first wave and in the second wave

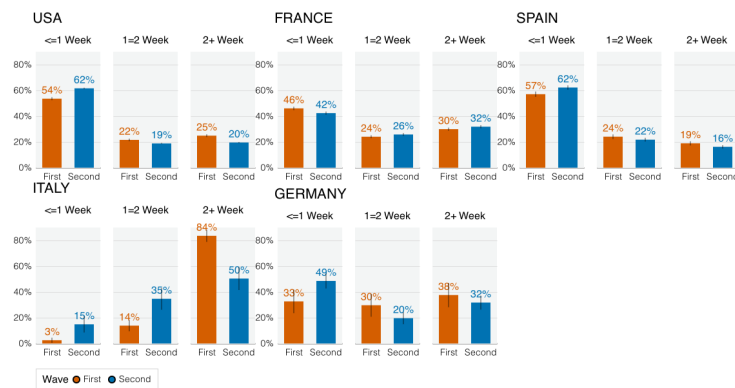

eFigure 5. Hazard ratio of the Cox model for mortality risk prediction (excluding Italy).

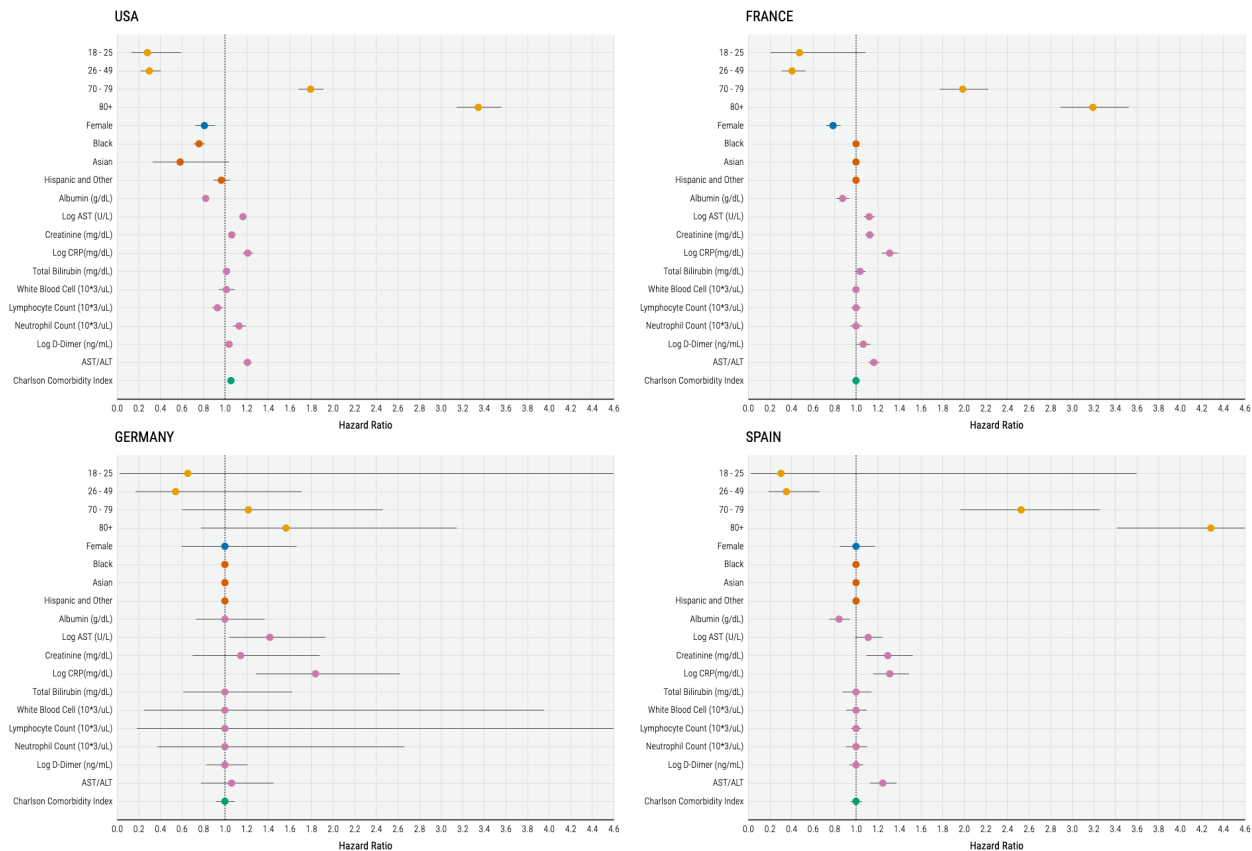

**eFigure 6. AUC of the Cox regression model for mortality risk prediction (excluding Italy).**

(a) Meta-analysis over all countries.

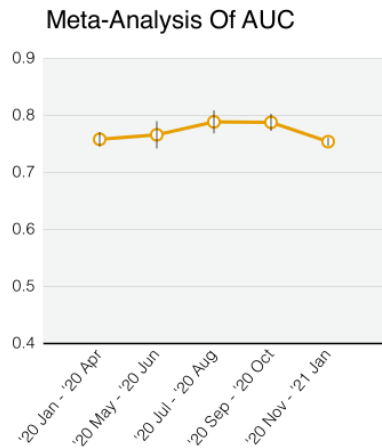

(b) Country-level AUC over time. AUC was not reported for May–June 2020, and July–August 2020 in Germany due to small counts of death occurring during these months.

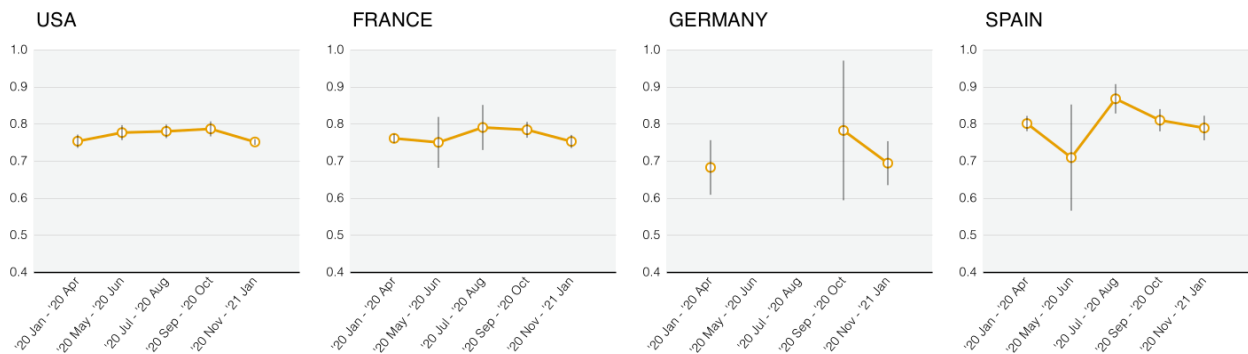

eFigure 7. Country-level risk model results w/ event rate information and risk stratification (excluding Italy).

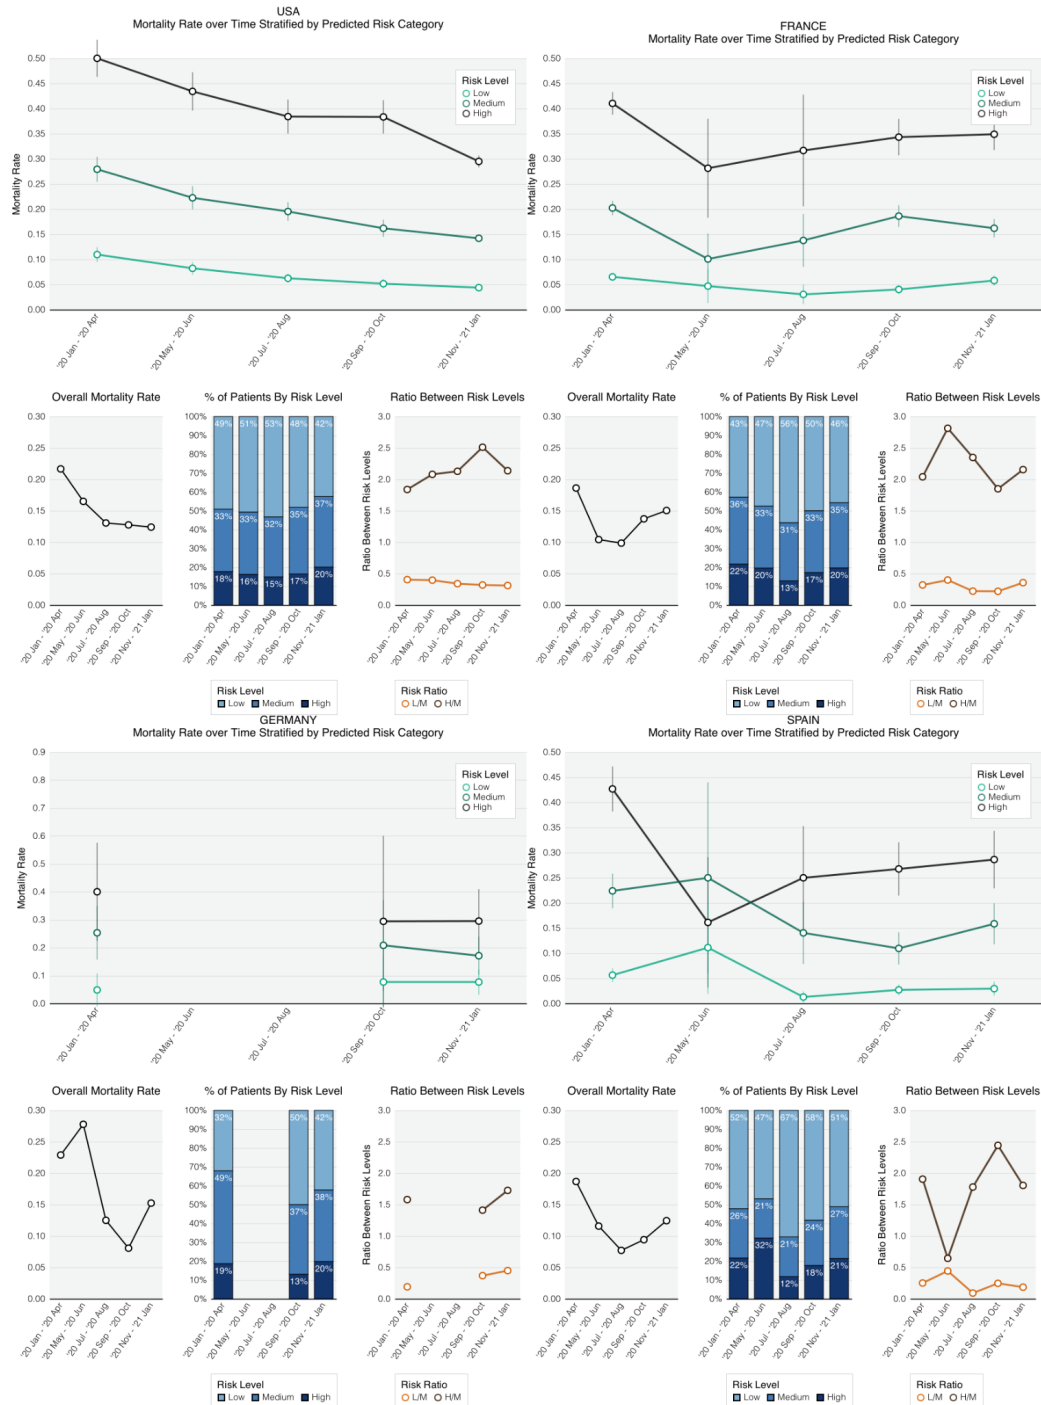

1. Jones AL, Petty WBP, Carter ME, Brignone E, Redd A, Suo Y, et al. Regional Variations in Documentation of Sexual Trauma Concepts in Electronic Medical Records in the United States Veterans Health Administration. AMIA Annu Symp Proc. 2019;2019: 514–522.

STROBE Statement—Checklist of items that should be included in reports of *cohort studies*

|                              | Item No | Recommendation                                                                                                                                                                                                                                                                                                         | Page No                   |
|------------------------------|---------|------------------------------------------------------------------------------------------------------------------------------------------------------------------------------------------------------------------------------------------------------------------------------------------------------------------------|---------------------------|
| <b>Title and abstract</b>    | 1       | (a) Indicate the study's design with a commonly used term in the title or the abstract                                                                                                                                                                                                                                 | 1                         |
|                              |         | (b) Provide in the abstract an informative and balanced summary of what was done and what was found                                                                                                                                                                                                                    | 3-4                       |
| <b>Introduction</b>          |         |                                                                                                                                                                                                                                                                                                                        |                           |
| Background/rationale         | 2       | Explain the scientific background and rationale for the investigation being reported                                                                                                                                                                                                                                   | 5                         |
| Objectives                   | 3       | State specific objectives, including any prespecified hypotheses                                                                                                                                                                                                                                                       | 5                         |
| <b>Methods</b>               |         |                                                                                                                                                                                                                                                                                                                        |                           |
| Study design                 | 4       | Present key elements of study design early in the paper                                                                                                                                                                                                                                                                | 5                         |
| Setting                      | 5       | Describe the setting, locations, and relevant dates, including periods of recruitment, exposure, follow-up, and data collection                                                                                                                                                                                        | 6                         |
| Participants                 | 6       | (a) Give the eligibility criteria, and the sources and methods of selection of participants. Describe methods of follow-up<br>(b) For matched studies, give matching criteria and number of exposed and unexposed                                                                                                      | 6                         |
| Variables                    | 7       | Clearly define all outcomes, exposures, predictors, potential confounders, and effect modifiers. Give diagnostic criteria, if applicable                                                                                                                                                                               | 6-7                       |
| Data sources/<br>measurement | 8*      | For each variable of interest, give sources of data and details of methods of assessment (measurement). Describe comparability of assessment methods if there is more than one group                                                                                                                                   | 6                         |
| Bias                         | 9       | Describe any efforts to address potential sources of bias                                                                                                                                                                                                                                                              | 11                        |
| Study size                   | 10      | Explain how the study size was arrived at                                                                                                                                                                                                                                                                              | 6                         |
| Quantitative variables       | 11      | Explain how quantitative variables were handled in the analyses. If applicable, describe which groupings were chosen and why                                                                                                                                                                                           | 7                         |
| Statistical methods          | 12      | (a) Describe all statistical methods, including those used to control for confounding<br>(b) Describe any methods used to examine subgroups and interactions<br>(c) Explain how missing data were addressed<br>(d) If applicable, explain how loss to follow-up was addressed<br>(e) Describe any sensitivity analyses | 6-7<br>6-7<br>7<br>7<br>7 |
| <b>Results</b>               |         |                                                                                                                                                                                                                                                                                                                        |                           |

|                                                                                                                                                                                                                                                                |                  |     |                                                                                                                                                                                                                                                                                                         |            |
|----------------------------------------------------------------------------------------------------------------------------------------------------------------------------------------------------------------------------------------------------------------|------------------|-----|---------------------------------------------------------------------------------------------------------------------------------------------------------------------------------------------------------------------------------------------------------------------------------------------------------|------------|
| 1<br>2<br>3<br>4<br>5<br>6<br>7<br>8<br>9                                                                                                                                                                                                                      | Participants     | 13* | (a) Report numbers of individuals at each stage of study—eg numbers potentially eligible, examined for eligibility, confirmed eligible, included in the study, completing follow-up, and analysed<br><br>(b) Give reasons for non-participation at each stage<br><br>(c) Consider use of a flow diagram | 8          |
| 10<br>11<br>12<br>13<br>14<br>15<br>16<br>17                                                                                                                                                                                                                   | Descriptive data | 14* | (a) Give characteristics of study participants (eg demographic, clinical, social) and information on exposures and potential confounders<br><br>(b) Indicate number of participants with missing data for each variable of interest<br><br>(c) Summarise follow-up time (eg, average and total amount)  | 8<br><br>8 |
| 18<br>19<br>20<br>21<br>22<br>23<br>24<br>25<br>26<br>27<br>28<br>29<br>30<br>31<br>32<br>33<br>34<br>35<br>36<br>37<br>38<br>39<br>40<br>41<br>42<br>43<br>44<br>45<br>46<br>47<br>48<br>49<br>50<br>51<br>52<br>53<br>54<br>55<br>56<br>57<br>58<br>59<br>60 | Outcome data     | 15* | Report numbers of outcome events or summary measures over time                                                                                                                                                                                                                                          | 8-9        |

|    |                          |    |                                                                                                                                                                                                              |       |
|----|--------------------------|----|--------------------------------------------------------------------------------------------------------------------------------------------------------------------------------------------------------------|-------|
| 1  |                          |    |                                                                                                                                                                                                              |       |
| 2  | Main results             | 16 | (a) Give unadjusted estimates and, if applicable, confounder-adjusted estimates and their precision (eg, 95% confidence interval). Make clear which confounders were adjusted for and why they were included | 8-10  |
| 3  |                          |    |                                                                                                                                                                                                              |       |
| 4  |                          |    |                                                                                                                                                                                                              |       |
| 5  |                          |    |                                                                                                                                                                                                              |       |
| 6  |                          |    | (b) Report category boundaries when continuous variables were categorized                                                                                                                                    | 8-10  |
| 7  |                          |    |                                                                                                                                                                                                              |       |
| 8  |                          |    | (c) If relevant, consider translating estimates of relative risk into absolute risk for a meaningful time period                                                                                             | 10    |
| 9  |                          |    |                                                                                                                                                                                                              |       |
| 10 |                          |    |                                                                                                                                                                                                              |       |
| 11 | Other analyses           | 17 | Report other analyses done—eg analyses of subgroups and interactions, and sensitivity analyses                                                                                                               | 10    |
| 12 |                          |    |                                                                                                                                                                                                              |       |
| 13 |                          |    |                                                                                                                                                                                                              |       |
| 14 |                          |    |                                                                                                                                                                                                              |       |
| 15 | <b>Discussion</b>        |    |                                                                                                                                                                                                              |       |
| 16 |                          |    |                                                                                                                                                                                                              |       |
| 17 | Key results              | 18 | Summarise key results with reference to study objectives                                                                                                                                                     | 10-12 |
| 18 |                          |    |                                                                                                                                                                                                              |       |
| 19 | Limitations              | 19 | Discuss limitations of the study, taking into account sources of potential bias or imprecision. Discuss both direction and magnitude of any potential bias                                                   | 13    |
| 20 |                          |    |                                                                                                                                                                                                              |       |
| 21 |                          |    |                                                                                                                                                                                                              |       |
| 22 | Interpretation           | 20 | Give a cautious overall interpretation of results considering objectives, limitations, multiplicity of analyses, results from similar studies, and other relevant evidence                                   | 11-12 |
| 23 |                          |    |                                                                                                                                                                                                              |       |
| 24 |                          |    |                                                                                                                                                                                                              |       |
| 25 | Generalisability         | 21 | Discuss the generalisability (external validity) of the study results                                                                                                                                        | 13    |
| 26 |                          |    |                                                                                                                                                                                                              |       |
| 27 |                          |    |                                                                                                                                                                                                              |       |
| 28 |                          |    |                                                                                                                                                                                                              |       |
| 29 | <b>Other information</b> |    |                                                                                                                                                                                                              |       |
| 30 |                          |    |                                                                                                                                                                                                              |       |
| 31 | Funding                  | 22 | Give the source of funding and the role of the funders for the present study and, if applicable, for the original study on which the present article is based                                                | 14    |
| 32 |                          |    |                                                                                                                                                                                                              |       |
| 33 |                          |    |                                                                                                                                                                                                              |       |
| 34 |                          |    |                                                                                                                                                                                                              |       |

\*Give information separately for exposed and unexposed groups.

**Note:** An Explanation and Elaboration article discusses each checklist item and gives methodological background and published examples of transparent reporting. The STROBE checklist is best used in conjunction with this article (freely available on the Web sites of PLoS Medicine at <http://www.plosmedicine.org/>, Annals of Internal Medicine at <http://www.annals.org/>, and Epidemiology at <http://www.epidem.com/>). Information on the STROBE Initiative is available at <http://www.strobe-statement.org>.

# BMJ Open

## Changes in laboratory value improvement and mortality rates over the course of the pandemic: an international retrospective cohort study of hospitalized patients infected with SARS-CoV-2

|                               |                                                                                                                                                                                                                                                                                                                                                                                                                                                                                                                                                                                                                                                                                                                                                                                                                                                                                                                                                                                                                                                                                                                                                                                                                                                                                                                                                                                                                                                                                                                                                                                                                                                                                                                                                                                                                                                                                                                                                                                                                                                                    |
|-------------------------------|--------------------------------------------------------------------------------------------------------------------------------------------------------------------------------------------------------------------------------------------------------------------------------------------------------------------------------------------------------------------------------------------------------------------------------------------------------------------------------------------------------------------------------------------------------------------------------------------------------------------------------------------------------------------------------------------------------------------------------------------------------------------------------------------------------------------------------------------------------------------------------------------------------------------------------------------------------------------------------------------------------------------------------------------------------------------------------------------------------------------------------------------------------------------------------------------------------------------------------------------------------------------------------------------------------------------------------------------------------------------------------------------------------------------------------------------------------------------------------------------------------------------------------------------------------------------------------------------------------------------------------------------------------------------------------------------------------------------------------------------------------------------------------------------------------------------------------------------------------------------------------------------------------------------------------------------------------------------------------------------------------------------------------------------------------------------|
| Journal:                      | <i>BMJ Open</i>                                                                                                                                                                                                                                                                                                                                                                                                                                                                                                                                                                                                                                                                                                                                                                                                                                                                                                                                                                                                                                                                                                                                                                                                                                                                                                                                                                                                                                                                                                                                                                                                                                                                                                                                                                                                                                                                                                                                                                                                                                                    |
| Manuscript ID                 | bmjopen-2021-057725.R1                                                                                                                                                                                                                                                                                                                                                                                                                                                                                                                                                                                                                                                                                                                                                                                                                                                                                                                                                                                                                                                                                                                                                                                                                                                                                                                                                                                                                                                                                                                                                                                                                                                                                                                                                                                                                                                                                                                                                                                                                                             |
| Article Type:                 | Original research                                                                                                                                                                                                                                                                                                                                                                                                                                                                                                                                                                                                                                                                                                                                                                                                                                                                                                                                                                                                                                                                                                                                                                                                                                                                                                                                                                                                                                                                                                                                                                                                                                                                                                                                                                                                                                                                                                                                                                                                                                                  |
| Date Submitted by the Author: | 25-Feb-2022                                                                                                                                                                                                                                                                                                                                                                                                                                                                                                                                                                                                                                                                                                                                                                                                                                                                                                                                                                                                                                                                                                                                                                                                                                                                                                                                                                                                                                                                                                                                                                                                                                                                                                                                                                                                                                                                                                                                                                                                                                                        |
| Complete List of Authors:     | <p>Hong, Chuan; Harvard Medical School, Department of Biomedical Informatics</p> <p>Zhang, Harrison; Harvard Medical School, Department of Biomedical Informatics</p> <p>L'Yi, Sehi; Harvard Medical School, Department of Biomedical Informatics</p> <p>Weber, Griffin; Harvard Medical School, Department of Biomedical Informatics</p> <p>Avillach, Paul; Harvard Medical School, Department of Biomedical Informatics</p> <p>Tan, Bryce; National University Hospital, Department of Medicine</p> <p>Gutiérrez-Sacristán, Alba; Harvard Medical School, Department of Biomedical Informatics</p> <p>Bonzel, Clara-Lea; Harvard Medical School, Department of Biomedical Informatics</p> <p>Palmer, Nathan; Harvard Medical School, Department of Biomedical Informatics</p> <p>Malovini, Alberto; Istituti Clinici Scientifici Maugeri SpA SB IRCCS, Laboratory of Informatics and Systems Engineering for Clinical Research</p> <p>Tibollo, Valentina; Istituti Clinici Scientifici Maugeri SpA SB IRCCS, Laboratory of Informatics and Systems Engineering for Clinical Research</p> <p>Luo, Yuan; Northwestern University, Department of Preventive Medicine</p> <p>Hutch, Meghan; Northwestern University, Department of Preventive Medicine</p> <p>Liu, Molei; Harvard University T H Chan School of Public Health, Department of Biostatistics</p> <p>Bourgeois, Florence; Harvard Medical School, Department of Pediatrics</p> <p>Bellazzi, Riccardo; University of Pavia, Department of Electrical, Computer and Biomedical Engineering</p> <p>Chiovato, Luca; Istituti Clinici Scientifici Maugeri SpA SB IRCCS, Unit of Internal Medicine and Endocrinology</p> <p>Sanz Vidorreta, Fernando; David Geffen School of Medicine, Department of Medicine</p> <p>Le, Trang; University of Pennsylvania Perelman School of Medicine, Department of Biostatistics, Epidemiology, and Informatics</p> <p>Wang, Xuan; Harvard Medical School, Department of Biomedical Informatics</p> <p>Yuan, William; Harvard Medical School, Department of Biomedical</p> |



|    |                                                                                                                                                                                                                                        |
|----|----------------------------------------------------------------------------------------------------------------------------------------------------------------------------------------------------------------------------------------|
| 1  |                                                                                                                                                                                                                                        |
| 2  |                                                                                                                                                                                                                                        |
| 3  |                                                                                                                                                                                                                                        |
| 4  | Informatics                                                                                                                                                                                                                            |
| 5  | Neuraz, Antoine; Hopital universitaire Necker-Enfants malades,<br>Department of Biomedical Informatics                                                                                                                                 |
| 6  | Benoit, Vincent; APHP Greater Paris University Hospital, IT department,<br>Innovation & Data                                                                                                                                           |
| 7  | Moal, Bertrand; Bordeaux University Hospital, IAM unit                                                                                                                                                                                 |
| 8  | Morris, Michele; University of Pittsburgh, Department of Biomedical<br>Informatics                                                                                                                                                     |
| 9  | Hanauer, David; University of Michigan Medical School, Department of<br>Learning Health Sciences                                                                                                                                       |
| 10 | Maidlow, Sarah; University of Michigan, MICHHR Informatics                                                                                                                                                                             |
| 11 | Waghlikar, Kavishwar; Massachusetts General Hospital, Department of<br>Medicine                                                                                                                                                        |
| 12 | Murphy, Shawn; Massachusetts General Hospital, Neurology                                                                                                                                                                               |
| 13 | Estiri, Hossein; Massachusetts General Hospital, Department of Medicine                                                                                                                                                                |
| 14 | Makoudjou, Adeline; University of Freiburg Faculty of Medicine, Institute<br>of Medical Biometry and Statistics                                                                                                                        |
| 15 | Tippmann, Patric; Medical Center-University of Freiburg, Institute of<br>Medical Biometry and Statistics                                                                                                                               |
| 16 | Klann, Jeffery; Massachusetts General Hospital, Department of Medicine                                                                                                                                                                 |
| 17 | Follett, Robert; David Geffen School of Medicine, Department of Medicine                                                                                                                                                               |
| 18 | Gehlenborg, Nils; Harvard Medical School, Department of Biomedical<br>Informatics                                                                                                                                                      |
| 19 | Omenn, Gilbert; University of Michigan, Computational Medicine &<br>Bioinformatics                                                                                                                                                     |
| 20 | Xia, Zongqi; University of Pittsburgh, Department of Neurology                                                                                                                                                                         |
| 21 | Dagliati, Arianna; University of Pavia, Department of Electrical Computer<br>and Biomedical Engineering                                                                                                                                |
| 22 | Visweswaran, Shyam; University of Pittsburgh, Department of<br>Biomedical Informatics                                                                                                                                                  |
| 23 | Patel, Lav; University of Kansas Medical Center, Department of Internal<br>Medicine, Division of Medical Informatics                                                                                                                   |
| 24 | Mowery, Danielle; University of Pennsylvania Perelman School of<br>Medicine, Department of Biostatistics, Epidemiology, and Informatics                                                                                                |
| 25 | Schriver, Emily; University of Pennsylvania Health System, Data<br>Analytics Center                                                                                                                                                    |
| 26 | Samayamuthu, Malarkodi Jebathilagam; University of Pittsburgh,<br>Biomedical Informatics                                                                                                                                               |
| 27 | Kavuluru, Ramakanth ; University of Kentucky, Institute for Biomedical<br>Informatics                                                                                                                                                  |
| 28 | Lozano-Zahonero, Sara; University of Freiburg Faculty of Medicine,<br>Institute of Medical Biometry and Statistics                                                                                                                     |
| 29 | Zöller, Daniela; University of Freiburg Faculty of Medicine, Institute of<br>Medical Biometry and Statistics                                                                                                                           |
| 30 | Tan, Amelia; Harvard Medical School, Department of Biomedical<br>Informatics                                                                                                                                                           |
| 31 | Tan, Byorn; National University Hospital, Department of Medicine                                                                                                                                                                       |
| 32 | Ngiam, Kee Yuan; National University Hospital, Department of Surgery                                                                                                                                                                   |
| 33 | Holmes, John; University of Pennsylvania Perelman School of Medicine,<br>Department of Biostatistics, Epidemiology and Informatics; University of<br>Pennsylvania Perelman School of Medicine, Institute for Biomedical<br>Informatics |
| 34 | Schubert, Petra; VA Boston Healthcare System, Massachusetts Veterans<br>Epidemiology Research and Information Center (MAVERIC)                                                                                                         |
| 35 | Cho, Kelly; VA Boston Healthcare System, Massachusetts Veterans<br>Epidemiology Research and Information Center (MAVERIC)                                                                                                              |
| 36 | Ho, Yuk-Lam; VA Boston Healthcare System, Massachusetts Veterans<br>Epidemiology Research and Information Center (MAVERIC)                                                                                                             |
| 37 | Beaulieu-Jones, Brett K. ; Harvard Medical School, Biomedical<br>Informatics                                                                                                                                                           |
| 38 | Pedreira-Jiménez, Miguel; Hospital Universitario 12 de Octubre, Health                                                                                                                                                                 |
| 39 |                                                                                                                                                                                                                                        |
| 40 |                                                                                                                                                                                                                                        |
| 41 |                                                                                                                                                                                                                                        |
| 42 |                                                                                                                                                                                                                                        |
| 43 |                                                                                                                                                                                                                                        |
| 44 |                                                                                                                                                                                                                                        |
| 45 |                                                                                                                                                                                                                                        |
| 46 |                                                                                                                                                                                                                                        |
| 47 |                                                                                                                                                                                                                                        |
| 48 |                                                                                                                                                                                                                                        |
| 49 |                                                                                                                                                                                                                                        |
| 50 |                                                                                                                                                                                                                                        |
| 51 |                                                                                                                                                                                                                                        |
| 52 |                                                                                                                                                                                                                                        |
| 53 |                                                                                                                                                                                                                                        |
| 54 |                                                                                                                                                                                                                                        |
| 55 |                                                                                                                                                                                                                                        |
| 56 |                                                                                                                                                                                                                                        |
| 57 |                                                                                                                                                                                                                                        |
| 58 |                                                                                                                                                                                                                                        |
| 59 |                                                                                                                                                                                                                                        |
| 60 |                                                                                                                                                                                                                                        |

|                                 |                                                                                                                                                                                                                                                                                                                                                                                                                                                                                                                                                                                                                                                                |
|---------------------------------|----------------------------------------------------------------------------------------------------------------------------------------------------------------------------------------------------------------------------------------------------------------------------------------------------------------------------------------------------------------------------------------------------------------------------------------------------------------------------------------------------------------------------------------------------------------------------------------------------------------------------------------------------------------|
|                                 | Informatics<br>García-Barrío, Noelia; Hospital Universitario 12 de Octubre, Health Informatics<br>Serrano-Balazote, Pablo; Hospital Universitario 12 de Octubre, Health Informatics<br>Kohane, Isaac; Harvard Medical School, Department of Biomedical Informatics<br>Characterization of COVID-19 by EHR (4CE), The Consortium for Clinical; Harvard Medical School, Department of Biomedical Informatics<br>South , Andrew; Wake Forest University, Department of Pediatrics, Section of Nephrology<br>Brat, Gabriel A; Harvard Medical School, Department of Biomedical Informatics<br>Cai, T; Harvard Medical School, Department of Biomedical Informatics |
| <b>Primary Subject Heading</b>: | Epidemiology                                                                                                                                                                                                                                                                                                                                                                                                                                                                                                                                                                                                                                                   |
| Secondary Subject Heading:      | Public health, Health informatics, Infectious diseases                                                                                                                                                                                                                                                                                                                                                                                                                                                                                                                                                                                                         |
| Keywords:                       | COVID-19, Public health < INFECTIOUS DISEASES, Epidemiology < INFECTIOUS DISEASES                                                                                                                                                                                                                                                                                                                                                                                                                                                                                                                                                                              |
|                                 |                                                                                                                                                                                                                                                                                                                                                                                                                                                                                                                                                                                                                                                                |

SCHOLARONE™  
Manuscripts



I, the Submitting Author has the right to grant and does grant on behalf of all authors of the Work (as defined in the below author licence), an exclusive licence and/or a non-exclusive licence for contributions from authors who are: i) UK Crown employees; ii) where BMJ has agreed a CC-BY licence shall apply, and/or iii) in accordance with the terms applicable for US Federal Government officers or employees acting as part of their official duties; on a worldwide, perpetual, irrevocable, royalty-free basis to BMJ Publishing Group Ltd ("BMJ") its licensees and where the relevant Journal is co-owned by BMJ to the co-owners of the Journal, to publish the Work in this journal and any other BMJ products and to exploit all rights, as set out in our [licence](#).

The Submitting Author accepts and understands that any supply made under these terms is made by BMJ to the Submitting Author unless you are acting as an employee on behalf of your employer or a postgraduate student of an affiliated institution which is paying any applicable article publishing charge ("APC") for Open Access articles. Where the Submitting Author wishes to make the Work available on an Open Access basis (and intends to pay the relevant APC), the terms of reuse of such Open Access shall be governed by a Creative Commons licence – details of these licences and which [Creative Commons](#) licence will apply to this Work are set out in our licence referred to above.

Other than as permitted in any relevant BMJ Author's Self Archiving Policies, I confirm this Work has not been accepted for publication elsewhere, is not being considered for publication elsewhere and does not duplicate material already published. I confirm all authors consent to publication of this Work and authorise the granting of this licence.

# Changes in laboratory value improvement and mortality rates over the course of the pandemic: an international retrospective cohort study of hospitalized patients infected with SARS-CoV-2

Chuan Hong PhD<sup>1\*</sup>, Harrison G Zhang<sup>1\*</sup>, Sehi L'Yi PhD<sup>1\*</sup>, Griffin M Weber MD, PhD<sup>1</sup>, Paul Avillach MD, PhD<sup>1</sup>, Bryce W.Q. Tan MBBS<sup>2</sup>, Alba Gutiérrez Sacristán PhD<sup>1</sup>, Clara-Lea Bonzel MSc<sup>1</sup>, Nathan P Palmer PhD<sup>1</sup>, Alberto Malovini PhD<sup>3</sup>, Valentina Tibollo MS<sup>3</sup>, Yuan Luo PhD<sup>4</sup>, Meghan R Hutch BS<sup>4</sup>, Molei Liu MSc<sup>5</sup>, Florence T Bourgeois<sup>6</sup>, Riccardo Bellazzi MS, PhD<sup>7</sup>, Luca Chiovato MD, PhD<sup>8</sup>, Fernando J. Sanz Vidorreta BS<sup>9</sup>, Trang T Le PhD<sup>10</sup>, Xuan Wang PhD<sup>1</sup>, William Yuan PhD<sup>1</sup>, Antoine Neuraz MD, PhD<sup>11</sup>, Vincent Benoit PhD<sup>12</sup>, Bertrand Moal MD, PhD<sup>13</sup>, Michele Morris BA<sup>14</sup>, David A Hanauer MD, MS<sup>15</sup>, Sarah Maidlow<sup>16</sup>, Kavishwar B Waghlikar MBBS, PhD<sup>17</sup>, Shawn N Murphy MD, PhD<sup>17</sup>, Hossein Estiri PhD<sup>17</sup>, Adeline Makoudjou MD<sup>18</sup>, Patric Tippmann MSc<sup>18</sup>, Jeffrey G Klann MEng, PhD<sup>17</sup>, Robert W Follett<sup>9</sup>, Nils Gehlenborg<sup>1</sup>, Gilbert S Omenn MD, PhD<sup>19</sup>, Zongqi Xia MD, PhD<sup>20</sup>, Arianna Dagliati MS, PhD<sup>7</sup>, Shyam Visweswaran MD, PhD<sup>14</sup>, Lav P Patel MS<sup>21</sup>, Danielle L Mowery PhD<sup>10</sup>, Emily R Schriver MS<sup>22</sup>, Malarkodi J Samayamuthu MD<sup>14</sup>, Ramakanth Kavuluru PhD<sup>23</sup>, Sara Lozano-Zahonero PhD<sup>18</sup>, Daniela Zoeller PhD<sup>18</sup>, Amelia LM Tan BSc, PhD<sup>1</sup>, Byorn W.L. Tan MBBS<sup>2</sup>, Kee Yuan Ngiam MBBS, MRCS, MMed, FRCS<sup>24</sup>, John H Holmes MS, PhD<sup>10,25</sup>, Petra Schubert MPH<sup>26</sup>, Kelly Cho PhD<sup>26</sup>, Yuk-Lam Ho MPH<sup>26</sup>, Brett K. Beaulieu-Jones PhD<sup>1</sup>, Miguel Pedrera-Jiménez MS<sup>27</sup>, Noelia García-Barrio MS<sup>27</sup>, Pablo Serrano-Balazote MD, MS<sup>27</sup>, The Consortium for Clinical Characterization of COVID-19 by EHR (4CE)<sup>1</sup>, Isaac S Kohane MD, PhD<sup>1</sup>, Andrew M South MD, MS<sup>28†</sup>, Gabriel A Brat MD, MPH<sup>1†</sup>, Tianxi Cai ScD<sup>1†</sup>

\*Hong, Zhang and L'Yi contributed equally

†South, Brat and Cai contributed equally

1. Department of Biomedical Informatics, Harvard Medical School, Boston, MA, USA
2. Department of Medicine, National University Hospital, Singapore
3. Laboratory of Informatics and Systems Engineering for Clinical Research, Istituti Clinici Scientifici Maugeri SpA SB IRCCS, Pavia, Italy
4. Department of Preventive Medicine, Northwestern University, Chicago, IL, USA
5. Department of Biostatistics, Harvard T.H. Chan School of Public Health, Boston, MA, USA
6. Department of Pediatrics, Harvard Medical School, Boston, MA, USA
7. Department of Electrical, Computer and Biomedical Engineering, University of Pavia, Italy
8. Unit of Internal Medicine and Endocrinology, Istituti Clinici Scientifici Maugeri SpA SB IRCCS, Pavia, Italy

- 1
- 2
- 3
- 4 9. Department of Medicine, David Geffen School of Medicine at UCLA, Los Angeles, CA,
- 5 USA
- 6 10. Department of Biostatistics, Epidemiology, and Informatics, University of Pennsylvania
- 7 Perelman School of Medicine, Philadelphia, PA, USA
- 8 11. Department of Biomedical Informatics, Hôpital Necker-Enfants Malade, Assistance
- 9 Publique Hôpitaux de Paris (APHP), University of Paris, France
- 10 12. IT department, Innovation & Data, APHP Greater Paris University Hospital, Paris, France
- 11 13. IAM unit, Bordeaux University Hospital, Bordeaux, France
- 12 14. Department of Biomedical Informatics, University of Pittsburgh, PA, USA
- 13 15. Department of Learning Health Sciences, University of Michigan Medical School, Ann
- 14 Arbor, MI, USA
- 15 16. MICHR Informatics, University of Michigan, Ann Arbor, MI, USA
- 16 17. Department of Medicine, Massachusetts General Hospital, Boston, MA, USA
- 17 18. Institute of Medical Biometry and Statistics, Faculty of Medicine and Medical Center,
- 18 University of Freiburg, Freiburg, Germany
- 19 19. Dept of Computational Medicine & Bioinformatics, Internal Med, Human Genetics, and
- 20 Public Health University of Michigan, Ann Arbor, MI, USA
- 21 20. Department of Neurology, University of Pittsburgh, PA, USA
- 22 21. Department of Internal Medicine, Division of Medical Informatics University Of Kansas
- 23 Medical Center, Kansas City, KS, USA
- 24 22. Data Analytics Center, University of Pennsylvania Health System, Philadelphia, PA, USA
- 25 23. Institute for Biomedical Informatics, University of Kentucky, Lexington, KY, USA
- 26 24. Department of Biomedical informatics, WiSDM, National University Health Systems,
- 27 Singapore
- 28 25. Institute for Biomedical Informatics, University of Pennsylvania Perelman School of
- 29 Medicine, Philadelphia, PA, USA
- 30 26. Massachusetts Veterans Epidemiology Research and Information Center (MAVERIC), VA
- 31 Boston Healthcare System, Boston, MA, USA
- 32 27. Health Informatics, Hospital Universitario 12 de Octubre, Madrid, Spain
- 33 28. Department of Pediatrics-Section of Nephrology, Brenner Children's Hospital, Wake Forest
- 34 School of Medicine, Winston Salem, NC, USA
- 35
- 36
- 37
- 38
- 39
- 40
- 41
- 42
- 43
- 44
- 45

46 Correspondence to: Andrew M South MD, MS, Medical Center Boulevard, Winston Salem, NC  
47 27157. Email: [asouth@wakehealth.edu](mailto:asouth@wakehealth.edu); Gabriel A Brat MD, MPH, Department of Biomedical  
48 Informatics, Harvard Medical School, 110 Francis St., Suite 3A, Boston, MA 02215. Email:  
49 [gbrat@bidmc.harvard.edu](mailto:gbrat@bidmc.harvard.edu); and Tianxi Cai ScD, Department of Biomedical Informatics, Harvard  
50 Medical School, 10 Shattuck St., Boston, Massachusetts 02115, USA. Email:  
51 [tcai@hsph.harvard.edu](mailto:tcai@hsph.harvard.edu).

Word count: 3930

## ABSTRACT:

**OBJECTIVE:** To assess changes in international mortality rates and laboratory recovery rates during hospitalization for patients hospitalized with SARS-CoV-2 between the first and second waves of the COVID-19 pandemic.

**DESIGN, SETTING, AND PARTICIPANTS:** This is a retrospective cohort study of 83,178 hospitalized patients admitted before or after polymerase chain reaction-confirmed SARS-CoV-2 infection within the Consortium for Clinical Characterization of COVID-19 by EHR (4CE), an international multi-healthcare system collaborative of 288 hospitals in the United States (US) and Europe.

**PRIMARY and SECONDARY OUTCOMES MEASURES:** The primary outcome was all-cause mortality rate within 28 days after hospitalization stratified by predicted low, medium, and high mortality risk at baseline. The secondary outcome was the average rate of change in laboratory values during the first week of hospitalization.

**RESULTS:** Baseline Charlson comorbidity index and laboratory values at admission were not significantly different between the first and second waves. The improvement in laboratory values over time was faster in the second wave compared to the first. The average CRP rate of change was  $-4.72$  vs.  $-4.14$  mg/dL per day ( $p=0.05$ ). The mortality rates within each risk category significantly decreased over time, with the most substantial decrease in the high-risk group (42.3% in March–April 2020 vs 30.8% in November 2020–January 2021,  $p<0.001$ ) and a moderate decrease in the intermediate-risk group (21.5% in March–April 2020 vs. 14.3% in November 2020–January 2021,  $p<0.001$ ).

**CONCLUSIONS:** Admission profiles of patients hospitalized with SARS-CoV-2 infection did not differ greatly between the first and second waves of the pandemic, but there were notable differences in laboratory improvement rates during hospitalization. Mortality risks among

1  
2  
3 patients with similar risk profiles decreased over the course of the pandemic. The improvement  
4 in laboratory values and mortality risk was consistent across multiple countries.  
5  
6  
7

## 8 **STRENGTHS AND LIMITATIONS:**

9

- 10 ● Our federated approach avoided privacy concerns and regulatory barriers common in  
11 multicentre studies while facilitating timely international analyses of 83,178 patients  
12 from five countries.  
13
- 14 ● Our common data model along with iterative quality control efforts provide assurance on  
15 harmonized data quality.  
16
- 17 ● The current study may include patients who were either hospitalized due to COVID-19 or  
18 had a positive test for SARS-CoV-2 when admitted for an unrelated medical condition.  
19
- 20 ● For most 4CE participating healthcare systems, we were unable to capture all out-of-  
21 hospital mortality. However, most COVID-19-related mortality among inpatients occurs  
22 in the hospital and many discharged patients have post-discharge follow-up visits, which  
23 allow us to capture 28-day mortality reasonably well.  
24  
25  
26  
27  
28  
29

## 30 **INTRODUCTION**

31

---

32  
33  
34 Mortality rates among hospitalized patients with SARS-CoV-2 infection have decreased over the  
35 course of the COVID-19 pandemic [1–5]. It has been hypothesized that this may reflect a higher  
36 proportion of younger patients being hospitalized later in the pandemic, but a recently published  
37 study reported significant decreases in mortality after stratification by age group [6,7]. A variety  
38 of factors are likely responsible, including, but not limited to, improvements in clinical  
39 management, resource allocation, and earlier detection of disease [8–15]. There is limited  
40 evidence to shed light on these hypotheses; few studies have examined improvements of in-  
41 hospital recovery and outcomes over the course of the pandemic. In this international multi-  
42 healthcare system retrospective cohort study, we leveraged electronic health records (EHR) data  
43 from hospitalized COVID-19 patients[16] to examine temporal shifts in (1) the rate of change for  
44 laboratory values towards normal during hospitalization and (2) mortality rates stratified by  
45 baseline mortality risk.  
46  
47  
48  
49  
50  
51  
52  
53  
54  
55  
56  
57  
58  
59  
60

## METHODS

---

Individual-level EHR data on hospitalized COVID-19 patients from 18 healthcare systems of the 4CE consortium [17] were extracted and harmonized for this study. Supplementary Table 1 reports further metadata on the participating healthcare systems, which represent 288 hospitals across five countries: France, Germany, Italy, Spain, and the US. Each healthcare system ran the analyses locally and reported summary results to the central institution for federated analyses. Institutional review board approval was obtained at each healthcare system. This study followed the Strengthening the Reporting of Observational Studies in Epidemiology (STROBE) reporting guidelines [18].

### Cohort Identification and Data Collection

Our study included 83,178 patients admitted 7 days before to 14 days after the date of their first positive reverse transcription-polymerase chain reaction SARS-CoV-2 test result recorded in their EHR. We included patients admitted between March 1, 2020 and January 31, 2021 with follow-up data up to June 2021.

We obtained patient-level data on demographics including age groups (18-25, 26-49, 50-69, 70-80, 80+), sex, and race; laboratory test values during hospitalization; International Classification of Disease (ICD) codes, date of discharge, and mortality information. Only US sites reported race. We calculated the Charlson comorbidity index (CCI) based on ICD codes [19–21]. We focused on ten laboratory tests: C-reactive protein (CRP), albumin, alanine aminotransferase (ALT), aspartate aminotransferase (AST), total bilirubin, creatinine, D-dimer, white blood cell count, lymphocyte count, and neutrophil count [10,22–26]. A schematic of our workflow is presented in eFigure 1.

### Primary and Secondary Outcomes

We defined all-cause mortality up to 28 days after the admission date as the primary outcome and excluded patients who died on the day of admission in the survival analysis. Each 4CE healthcare system used local criteria to identify in-hospital mortality. We defined laboratory test values during hospitalization as secondary outcomes.



## Statistical Analysis

To assess temporal changes over the course of the pandemic, we performed stratified analyses by every two calendar months and between two waves of the pandemic, wherein we defined the first wave as from March 1 to June 30, 2020 and the second wave as from July 1, 2020 to January 31, 2021.

We summarized demographic characteristics, the average CCI at admission, hospitalization duration, and absolute mortality risk over time. Since the VA population has a distinct demographic composition, we reported demographic summaries excluding the VA. We further compared the distributions of admission laboratory values between the two waves.

To summarize the laboratory trajectories during hospitalization, we fit log-linear mixed effects models to the longitudinal laboratory data with cubic splines for time since admission, where we used three knots at days 3, 7, and 17 in the fixed effects to capture nonlinear trends. Since laboratory trajectories may vary by how quickly patients recover, we stratified **the trajectory analysis by the hospitalization duration  $\leq 1$  week**, 1-2 weeks, and 2+ weeks. For each laboratory test, we summarized the *average daily rate of change during the first week of hospitalization* in the first and second waves, denoted by  $R_1$  and  $R_2$ . The laboratory trajectory analyses only included data from the US, France, and Spain since few patients from the Germany and Italy sites had repeated laboratory tests.

To study temporal changes in mortality risks, we fit LASSO penalized Cox proportional hazard models for mortality using baseline covariates adjusted for calendar time of the admission date [27,28]. We considered three sets of covariates: (1) age, sex, and race; (2) the ten laboratory tests; and (3) CCI. We modeled the calendar time effect using a cubic spline with knots every 2 weeks. We performed a  $\log_e$ -transformation to D-dimer, CRP, and ALT due to the skewness in their distributions. Due to the high correlation between ALT and AST, we include AST to ALT ratio (AST/ALT) and  $\log_e$ ALT as measures of liver function [29,30] instead of  $\log_e$ AST and  $\log_e$ ALT. We imputed missing baseline laboratory measures and CCI via the multivariate imputation by chained equation method and averaged over five imputed sets [31]. The mortality

1  
2  
3 analyses excluded Italy since a very small number of deaths occurred after April 2020 in the  
4 participating healthcare systems.  
5  
6

7  
8 Using the trained penalized Cox model, we obtained a mortality risk score for each patient  
9 constructed using their baseline covariates. The candidate covariates included in the model  
10 training were determined according to existing clinical knowledge. We calculated the area under  
11 the receiver operating characteristic curve (AUC) of the risk score for predicting 28-day  
12 mortality [32]. We classified patients into three mortality risk groups according to their risk  
13 score: high risk if score  $> c_{\text{high}}$ , **medium risk if score  $\in (c_{\text{low}}, c_{\text{high}})$ , and low risk if**  
14 **score  $\leq c_{\text{low}}$ .** We chose  $c_{\text{low}}$  and  $c_{\text{high}}$  to attain a sensitivity of 85% ( $c_{\text{low}}$ ) and a specificity of  
15 85% ( $c_{\text{high}}$ ) for predicting 28-day mortality, which ensures a good separation between the low-  
16 risk and high-risk categories. Stratifying by the calendar time window of the admission date, we  
17 calculated the AUC of the risk model, the proportions of patients belonging to each risk  
18 category, and their corresponding mortality risks. The accuracy parameters were estimated via  
19 ten-fold cross-validation to correct for overfitting [33]. We used bootstrap to estimate standard  
20 errors [34].  
21  
22  
23  
24  
25  
26  
27  
28  
29  
30  
31

32 Patient-level analyses were performed within each 4CE healthcare system to obtain site-specific  
33 results. We integrate results from all sites using fixed effects meta-analysis. Since the number of  
34 hospitalized patients had a different temporal trend across healthcare systems and across  
35 countries, we assigned the same weight across different calendar months for each healthcare  
36 system to facilitate effective comparisons between waves. All statistical analyses were performed  
37 using R software version 4.0.2.  
38  
39  
40  
41  
42

## 43 RESULTS

### 44 Characteristics of the Study Cohort

45  
46  
47 The majority of patients were hospitalized March–April 2020 and November 2020 to January  
48 2021 (Figure 1). The most prevalent age group at any time was ages 50–69. In the US—  
49 excluding VA patients which are summarized in eFigure 2—the prevalence of patients who were  
50 White increased (49.1% in March–April 2020 to 64.1% in November 2020–January 2021,  
51  $p < 0.001$ ), while the prevalence of patients who were Black decreased (30.0% in March–April  
52  
53  
54  
55  
56  
57  
58  
59  
60

2020 to 17.4% in November 2020–January 2021,  $p<0.001$ ). The average CCI at admission remained relatively constant across time. The absolute 28-day mortality risk decreased from 20.7% in March–April 2020 to 11.9% in July–August 2020 ( $p<0.001$ ), then increased slightly to 12.4% in November 2020–January 2021 ( $p<0.001$ ). The temporal shifts in the number of hospitalized patients, demographics, CCI, and mortality rate were generally consistent across countries (eFigure 2).

As shown in Figure 2, observed CRP, creatinine, and D-dimer values at admission were lower in the first wave compared to the second but these differences were not statistically significant. The between-wave CRP mean difference was higher for France (18.5 mg/dL; 95% CI, 16.5-20.5) and Spain (8.4 mg/dL; 95% CI, 4.8-12.0) compared to the US (7.5 mg/dL; 95% CI, 6.1-8.8) and Germany (6.7 mg/dL; 95% CI, -2.5-16.1) (eFigure 3).

#### Change in Laboratory Trajectory During Hospitalization

Patients' laboratory trajectories during hospitalization improved faster in the second wave compared to the first (Figure 3). CRP values decreased more rapidly ( $R_1 = -4.14$  vs.  $R_2 = -4.72$  mg/dL per day,  $p=0.05$ ), while D-dimer values increased substantially faster during the first wave but remained relatively stagnant during the second ( $R_1 = 21.01$  vs.  $R_2 = 1.25$  ng/dL per day,  $p<0.001$ ).

Hospitalization duration decreased, with 53.4% of patients discharged within 1 week in the second wave compared to 49.2% in the first ( $p<0.001$ ). Patients hospitalized for longer generally had worse laboratory profiles compared to those with shorter stays. The average day-3 CRP among those hospitalized for  $\leq 1$  week and 2+ weeks was 41.68 and 63.64 mg/dL ( $p<0.001$ ) during the first wave and 27.33 and 43.52 mg/dL ( $p<0.001$ ) during the second wave. The between-wave difference in the rate of decline,  $\Delta_R = R_1 - R_2$ , also varied by the duration of hospitalization. For CRP,  $\Delta_R$  was 1.01 ( $p<0.001$ ), 2.04 ( $p<0.001$ ) and 0.95 ( $p=0.001$ ) mg/dL per day among those hospitalized for  $\leq 1$ , 1-2, and 2+ weeks, respectively. For creatinine and D-dimer,  $\Delta_R$  had similar patterns but were not statistically significant.

1  
2  
3 Improvement in laboratory values was more pronounced in the US than in France and Spain  
4 (eFigure 4). For CRP,  $\Delta_R = 1.07$  mg/dL per day (95% CI, 0.86-1.28) in the US, which is  
5 significantly higher than that of France ( $-0.69$  mg/dL per day, 95% CI,  $-1.08$ - 2.92), and Spain  
6 ( $-0.3$  mg/dL per day, 95%CI, $-0.79$ -0.19). The reduction in hospitalization duration varied  
7 greatly between countries. The proportion of patients discharged within 1 week increased in the  
8 second wave compared to the first in the US (53.4% vs 61.1%,  $p<0.001$ ), Italy (2.5% vs 14.9%,  
9  $p<0.001$ ), Germany (32.7% vs 48.6%,  $p<0.001$ ), and Spain (57.1% vs 62.3%,  $p<0.001$ ), but  
10 decreased in France (46.1% vs 42.4%,  $p<0.001$ ).  
11  
12  
13  
14  
15  
16  
17

### 18 Temporal Changes in Mortality Risk

19 In our survival analysis, the variables significantly associated with increased risk of mortality  
20 were older age, male sex, CCI, lower albumin and lymphocyte count, and higher CRP, total  
21 bilirubin, white blood cell count, neutrophil count, D-dimer, ALT, and AST/ALT at baseline  
22 (Figure 4). The hazard ratios of these risk factors were concordant between countries (eFigure  
23 5).  
24  
25  
26  
27  
28  
29

30 Over the course of the pandemic, the models' predictive capabilities did not significantly change  
31 with AUC ranging from 0.752 to 0.787; the temporal patterns were similar across countries  
32 (eFigure 6).  
33  
34  
35  
36  
37

38 The proportion of high-risk patients decreased from March-April 2020 to July-August 2020 but  
39 gradually increased from September 2020 to January 2021 (Figure 5). However, the mortality  
40 rates within each risk category decreased over calendar time, with the decrease from March–  
41 April 2020 to November 2020–January 2021 most substantial in the high-risk category (47.1%  
42 vs. 30.8%,  $p<0.001$ ), moderate in the intermediate-risk (25.6% vs. 14.8%,  $p<0.001$ ), and the  
43 low-risk (9.5% vs 4.7%,  $p<0.001$ ) categories. From March–April 2020 to November 2020–  
44 January 2021, the US had a more consistent decrease over time while France and Spain  
45 decreased from March–April 2020 to July–August 2020 but plateaued afterwards (eFigure 7). In  
46 the high-risk category, the decrease in mortality risk from March–April 2020 to July–August  
47 2020 was the highest in Spain (42.7% vs 25.0%,  $p=0.002$ ), followed by the US (50.0% vs 38.4%,  
48  $p<0.001$ ), and France (40.1% vs. 31.7%,  $p=0.11$ ). By November 2020–January 2021, the  
49  
50  
51  
52  
53  
54  
55  
56  
57  
58  
59  
60

1  
2  
3 mortality risk further decreased to 29.5% (95% CI, 28.3-30.7) in the US, but slightly increased to  
4 34.9% (95% CI, 31.7-38.0) in France and 28.6% (95% CI, 22.9-34.3) in Spain.  
5  
6  
7

## 8 9 **DISCUSSION**

---

10  
11  
12 In this large, international, multi-healthcare system retrospective cohort study, we found  
13 decreasing mortality rates and faster physiological recovery based on laboratory profiles between  
14 the first and second wave of the COVID-19 pandemic. Given the minimal changes in patient  
15 demographic and clinical profiles at admission between the two waves, , our findings cannot be  
16 entirely explained by a less severely ill cohort of patients admitted in the second wave [7,35–37].  
17 Given that no new major effective pharmacologic therapies were introduced between the two  
18 waves, we could not attribute the difference to new pharmacologic therapies either [38–47].  
19 Potential explanations for the differences between the two waves include timing for emergency  
20 visits and hospital admissions, iterative improvement in management strategies of the severe  
21 cases, and increased preparedness of healthcare systems in the latter stages of the pandemic. As  
22 diverse healthcare systems and populations in different countries learned to improve the care of  
23 patients with COVID-19 through diverse experiences, knowledge rapidly disseminated. For  
24 example, hospitals may have benefited from improved resource allocation strategies and  
25 management in smaller surges in hospitalizations[48]. Negative trial data for  
26 hydroxychloroquine, azithromycin, and other pharmacologic agents may have led to reduced  
27 usage of these drugs and reduced drug-related adverse effects over the course of the pandemic  
28 [40,49–52]. Further investigations into the potential explanations are warranted as this study was  
29 not designed to infer the specific reasons for this improvement.  
30  
31  
32  
33  
34  
35  
36  
37  
38  
39  
40  
41  
42  
43  
44

45 Overall, we observed greater improvements in positive and negative acute phase reactants and  
46 markers of organ function (e.g., creatinine, ALT, and AST) in the second wave compared to the  
47 first, which suggests that systemic inflammation and multiorgan dysfunction all improved faster  
48 in the second wave. Interestingly, we observed greater improvements in CRP, ALT, AST, and  
49 creatinine in the second wave in patients with longer hospitalizations; while this may be  
50 reflective of a sicker patient population, this could be due to time-dependent (i.e., survivor) bias  
51 [53]. Alternatively, there may have been increased corticosteroid use in patients with severe  
52  
53  
54  
55  
56  
57  
58  
59  
60

1  
2  
3 COVID-19 in the second wave following preliminary results of the RECOVERY trial, which  
4 may have improved inflammatory markers and mortality [14,54,55]. In addition, there may have  
5 been increased remdesivir in combination with dexamethasone between the first and second  
6 waves that may confound these associations [13,54]. Further studies are warranted to investigate  
7 the alteration of biochemical trajectories of dexamethasone with remdesivir in contrast to  
8 dexamethasone or remdesivir monotherapy [56]. It is also unclear why we observed between-  
9 country differences in the between-wave CRP trajectories, whereupon Spain and France had  
10 blunted improvement rates; this could certainly be due to differential clinical management across  
11 countries.  
12  
13  
14  
15  
16  
17  
18  
19

20 One potential explanation for the blunted D-dimer trajectories in the second wave compared to  
21 the first is increased prophylactic anticoagulation use after the release of International Society on  
22 Thrombosis and Haemostasis guidelines in May and September 2020, which recommended  
23 prophylactic anticoagulation with low-molecular-weight heparin in all hospitalized patients with  
24 COVID-19 who had no anticoagulation contraindications [57]. This may have reduced the higher  
25 incidence of thrombotic events observed in the first wave, which could be associated with high  
26 D-dimer levels. Furthermore, as D-dimer is often correlated with disease severity and systemic  
27 inflammation, increased glucocorticoid use in patients with severe disease could blunt increases  
28 in D-dimer [49,58–60].  
29  
30  
31  
32  
33  
34  
35  
36  
37

38 Our study suggests that older age, male sex, higher CCI, low albumin and lymphocyte count  
39 values, and higher CRP, total bilirubin, white blood cell count, neutrophil count, D-dimer, ALT,  
40 and AST/ALT were significantly associated with higher mortality risk. While male sex, older  
41 age, and existing comorbidities are established major risk factors for COVID-19-related  
42 mortality, our observations of the associations between higher AST/ALT, ALT, and bilirubin  
43 with mortality [50,51,61,62] are unique. While derangements in liver function tests are well  
44 described in prior studies of patients with COVID-19, the patterns of liver dysfunction associated  
45 with worse outcomes have been inconsistent [52,63]. Furthermore, these prior observations  
46 tended to be derived from single-center studies which likely introduce significant sources of bias.  
47 In particular, our observation of a combination of elevated markers of cholestatic liver function  
48 (bilirubin, AST/ALT ratio), inflammatory markers, and cell counts suggests that cholestatic liver  
49  
50  
51  
52  
53  
54  
55  
56  
57  
58  
59  
60

dysfunction may be involved in the disease course, as is observed in patients who are critically ill [64–66]. Furthermore, emerging, though limited, COVID-19 post-mortem studies have suggested that SARS-CoV-2 may directly infect hepatocytes and lead to altered bile duct morphology, reinforcing the possible role of viral-induced cholestatic hepatitis in severe COVID-19 [66]. Alternatively, medication-related liver injury could certainly contribute to liver dysfunction. Future investigations utilizing patient-level data validated by thorough chart review is warranted to better define these associations.

Although cross-country and cross-healthcare-system heterogeneities exist in demographics and laboratory distributions, we observed concordant improvement patterns in both laboratory recovery during hospitalization and mortality risk over time across different countries. However, the admission profile-adjusted temporal change in mortality risk over calendar months differed slightly between the US and Europe (Spain and France). In addition to an increase in hospitalization duration in the latter half of the pandemic in France, in Spain and France the mortality risk plateaued overall and actually increased in the high-risk group. Further investigation into these between-country differences in mortality using chart review and other validation steps is warranted.

### Limitations

This study has several limitations. First, similar to other EHR-based studies, the current study might have included patients with incidental hospitalization (i.e., a positive test for SARS-CoV-2 when admitted for an unrelated medical condition) [67]. Further, information regarding each patient's in-hospital care settings, such as admission to intensive care units and their specific respiratory status was not available. Second, most 4CE participating healthcare systems were unable to capture all out-of-hospital mortality. However, most COVID-19-related mortality occurs in the hospital, and most discharged patients would have post-discharge follow-up visits, which would reasonably capture 28-day mortality. A further limitation was the lack of data on patient-specific timing of symptom onset relative to hospital course. Additionally, our study may have potential time-dependent bias given that 4CE defines a first hospital admission that occurs between 7 days before and up to 14 days after the first positive SARS-CoV-2 PCR test. This may also affect the results stratified by duration of hospitalization. Future analyses accounting for



1  
2  
3 medication administration and procedure use and the subsequent effect on inflammatory markers  
4 and creatinine are necessary to infer why these outcomes improved in the second wave.  
5  
6  
7  
8  
9

## 10 11 12 **CONCLUSION**

13 Patients' admission profiles did not differ substantially between waves of the COVID-19  
14 pandemic, but there were notable differences in laboratory recovery rates and mortality in the  
15 second wave compared to the first.  
16  
17  
18

---

## 19 20 **ETHICS STATEMENT**

21  
22  
23  
24 All study sites were responsible for and obtained ethics approval, as needed, from the appropriate  
25 ethics committee at their institution. IRB protocols were reviewed and approved at APHP  
26 (IRB00011591, Project CSE-20-29\_ClinicalCOVID), Bordeaux University Hospital  
27 (Registration #CHUBX2020RE0253), ICSM (Protocol #2518 CE), Mass General Brigham  
28 (IRB#2020P001483), Northwestern University (IRB# STU00212845), University of Kansas  
29 (STUDY00146505), University of Freiburg (Application #255/20, Process #210587), and at VA  
30 North Atlantic, Southwest, Midwest, Continental, and Pacific (IRB # 3310-x).  
31  
32  
33  
34  
35  
36

37  
38 The research was determined to be exempt at Hospital Universitario 12 de Octubre (Protocol  
39 #20/403), University of Michigan (IRB# HUM00184357), Beth Israel Deaconess Medical Center  
40 (IRB# 2020P000565), University of Pittsburgh (STUDY20070095), and University of  
41 Pennsylvania (IRB#842813). University of California Los Angeles determined that this study  
42 does not need IRB approval because research using limited data sets does not constitute human  
43 subjects research.  
44  
45  
46  
47  
48

49  
50 The lead author affirms that the manuscript is an honest, accurate, and transparent account of the  
51 study being reported; that no important aspects of the study have been omitted; and that any  
52 discrepancies from the study as originally planned have been explained.  
53  
54  
55  
56  
57  
58  
59



## AUTHOR CONTRIBUTIONS

GMW, PA, AGS, NPP, RB, SNM, IK, GAB, and TC contributed to design and conceptualization of the study. GMW, NPP, AM, VT, YL, MRH, RB, LC, FJSV, VB, BM, MM, DAH, SM, KBW, SNM, HE, AM, PT, JGK, RWF, GSO, ZX, SV, LPP, DLM, ERS, MJS, SLZ, DZ, ALMT, BWLT, KYN, PS, KC, YLH, MPJ, NGB, and PSB contributed to data collection. CH, HZ, SL, GMW, PA, BWQT, AGS, CLB, YL, ML, FTB, TTL, XW, WY, AN, VB, BM, MM, DAH, MA, PT, JGK, NG, AD, LPP, RK, DZ, JHH, BKBJ, IK, AMS, GAB, and TC contributed to data analysis and interpretation. All authors contributed to drafting and revision of the manuscript and approved the final manuscript. All authors are accountable for all aspects of the work in ensuring that questions related to the accuracy or integrity of any part of the work are appropriately investigated and resolved.

## FUNDING STATEMENT

GMW is supported by NIH/NCATS UL1TR002541, NIH/NCATS UL1TR000005, NIH/NLM R01LM013345, and NIH/NHGRI 3U01HG008685-05S2. BWQT is supported by the National Medical Research Council Research Training Fellowship (MOH-000195-00). FJSV is supported by NIH/NCATS UL1TR001881. DAH is supported by NIH/NCATS UL1TR002240. KBW is supported by NIH/NHLBI R01 HL151643-01. SNM is supported by NIH/NCATS 5UL1TR001857-05 and NIH/NHGRI 5R01HG009174-04. NG is supported by NIH/NLM T15 LM007092. GSO is supported by NIH P30ES017885 and U24CA210967. ZX is supported by NIH/NINDS R01NS098023. SV is supported by NIH/NLM R01LM012095 and NIH/NCATS UL1TR001857. LPP is supported by NIH/NCATS CTSA Award #UL1TR002366. DLM is supported by NIH/NCATS CTSA Award #UL1-TR001878. RK is supported by NIH/NCATS CTSA award#UL1TR001998. NGB is supported by the Carlos III Health Institute PI18/00981. AMS is supported by NIH/NHLBI K23HL148394 and L40HL148910 and NIH/NCATS UL1TR001420.

## DATA SHARING STATEMENT

Only de-identified aggregate data was provided by sites for this study. All aggregate data used in this study are available for download at [www.covidclinical.net](http://www.covidclinical.net).

## COMPETING INTEREST STATEMENT

There are no competing interests to report.

### Patient and Public Involvement

Patients and the public were not involved in the design, conduct, or reporting, or dissemination plans of the research.

### **FIGURES and TABLES**

Figure 1: Demographic shifts. For demographics variables, we set male sex, age 50-69, and White race as reference groups.

Figure 2: Distribution of laboratory values at admission.

Figure 3: Patient-level laboratory recovery rate.

Figure 4. Hazard ratio of the Cox model for mortality risk prediction (excluding Italy).

Figure 5. Risk model results w/event rate information and risk stratification.

## REFERENCES

- 1 Horwitz LI, Jones SA, Cerfolio RJ, *et al.* Trends in COVID-19 Risk-Adjusted Mortality Rates. *J Hosp Med* 2021;**16**:90–2.
- 2 Dennis JM, McGovern AP, Vollmer SJ, *et al.* Improving Survival of Critical Care Patients With Coronavirus Disease 2019 in England: A National Cohort Study, March to June 2020. *Crit Care Med* 2021;**49**:209–14.
- 3 Asch DA, Sheils NE, Islam MN, *et al.* Variation in US Hospital Mortality Rates for Patients Admitted With COVID-19 During the First 6 Months of the Pandemic. *JAMA Intern Med* 2021;**181**:471–8.
- 4 Xu H, Garcia-Ptacek S, Annetorp M, *et al.* Decreased Mortality Over Time During the First Wave in Patients With COVID-19 in Geriatric Care: Data From the Stockholm GeroCovid Study. *J Am Med Dir Assoc* 2021;**22**:1565–73.e4.
- 5 Radovanovic D, Pini S, Franceschi E, *et al.* Characteristics and outcomes in hospitalized COVID-19 patients during the first 28 days of the spring and autumn pandemic waves in Milan: An observational prospective study. *Respir Med* 2021;**178**:106323.
- 6 Rossen LM, Branum AM, Ahmad FB, *et al.* Excess Deaths Associated with COVID-19, by Age and Race and Ethnicity - United States, January 26-October 3, 2020. *MMWR Morb Mortal Wkly Rep* 2020;**69**:1522–7.
- 7 Finelli L, Gupta V, Petigara T, *et al.* Mortality Among US Patients Hospitalized With SARS-CoV-2 Infection in 2020. *JAMA Netw Open* 2021;**4**:e216556.
- 8 Sun Q, Qiu H, Huang M, *et al.* Lower mortality of COVID-19 by early recognition and intervention: experience from Jiangsu Province. *Ann Intensive Care* 2020;**10**:33.
- 9 Wang D, Hu B, Hu C, *et al.* Clinical Characteristics of 138 Hospitalized Patients With 2019 Novel Coronavirus-Infected Pneumonia in Wuhan, China. *JAMA* 2020;**323**:1061–9.
- 10 Huang C, Wang Y, Li X, *et al.* Clinical features of patients infected with 2019 novel coronavirus in Wuhan, China. *The Lancet*. 2020;**395**:497–506. doi:10.1016/s0140-6736(20)30183-5
- 11 Goyal DK, Mansab F, Iqbal A, *et al.* Early intervention likely improves mortality in COVID-19 infection. *Clin Med* Published Online First: 1 May 2020. doi:10.7861/clinmed.2020-0214
- 12 Mittermaier M, Pickerodt P, Kurth F, *et al.* Evaluation of PEEP and prone positioning in early COVID-19 ARDS. *EClinicalMedicine* 2020;**28**:100579.
- 13 Beigel JH, Tomashek KM, Dodd LE, *et al.* Remdesivir for the Treatment of Covid-19 - Final Report. *N Engl J Med* 2020;**383**:1813–26.

- 14 WHO Rapid Evidence Appraisal for COVID-19 Therapies (REACT) Working Group, Sterne JAC, Murthy S, *et al.* Association Between Administration of Systemic Corticosteroids and Mortality Among Critically Ill Patients With COVID-19: A Meta-analysis. *JAMA* 2020;**324**:1330–41.
- 15 Saito S, Asai Y, Matsunaga N, *et al.* First and second COVID-19 waves in Japan: A comparison of disease severity and characteristics. *J. Infect.* 2021;**82**:84–123.
- 16 Le TT, Gutiérrez-Sacristán A, Son J, *et al.* Multinational characterization of neurological phenotypes in patients hospitalized with COVID-19. *Sci Rep* 2021;**11**:20238.
- 17 Brat GA, Weber GM, Gehlenborg N, *et al.* International electronic health record-derived COVID-19 clinical course profiles: the 4CE consortium. *NPJ Digit Med* 2020;**3**:109.
- 18 von Elm E, Altman DG, Egger M, *et al.* The Strengthening the Reporting of Observational Studies in Epidemiology (STROBE) statement: guidelines for reporting observational studies. *Lancet* 2007;**370**:1453–7.
- 19 Deyo R. Adapting a clinical comorbidity index for use with ICD-9-CM administrative databases. *Journal of Clinical Epidemiology.* 1992;**45**:613–9. doi:10.1016/0895-4356(92)90133-8
- 20 Quan H, Sundararajan V, Halfon P, *et al.* Coding algorithms for defining comorbidities in ICD-9-CM and ICD-10 administrative data. *Med Care* 2005;**43**:1130–9.
- 21 Ladha KS, Zhao K, Quraishi SA, *et al.* The Deyo-Charlson and Elixhauser-van Walraven Comorbidity Indices as predictors of mortality in critically ill patients. *BMJ Open* 2015;**5**:e008990.
- 22 Ghahramani S, Tabrizi R, Lankarani KB, *et al.* Laboratory features of severe vs. non-severe COVID-19 patients in Asian populations: a systematic review and meta-analysis. *Eur J Med Res* 2020;**25**:30.
- 23 Huang I, Pranata R, Lim MA, *et al.* C-reactive protein, procalcitonin, D-dimer, and ferritin in severe coronavirus disease-2019: a meta-analysis. *Ther Adv Respir Dis* 2020;**14**:1753466620937175.
- 24 Smilowitz NR, Kunichoff D, Garshick M, *et al.* C-reactive protein and clinical outcomes in patients with COVID-19. *Eur Heart J* 2021;**42**:2270–9.
- 25 Shi S, Nie B, Chen X, *et al.* Clinical and laboratory characteristics of severe and non-severe patients with COVID-19: A retrospective cohort study in China. *J Clin Lab Anal* 2021;**35**:e23692.
- 26 Wang F, Hou H, Wang T, *et al.* Establishing a model for predicting the outcome of COVID-19 based on combination of laboratory tests. *Travel Med Infect Dis* 2020;**36**:101782.
- 27 Simon N, Friedman J, Hastie T, *et al.* Regularization Paths for Cox's Proportional Hazards

- 1  
2  
3 Model via Coordinate Descent. *Journal of Statistical Software*. 2011;**39**.  
4 doi:10.18637/jss.v039.i05  
5
- 6 28 Tibshirani R. The lasso method for variable selection in the Cox model. *Stat Med*  
7 1997;**16**:385–95.  
8
- 9 29 Williams AL, Hoofnagle JH. Ratio of serum aspartate to alanine aminotransferase in  
10 chronic hepatitis. Relationship to cirrhosis. *Gastroenterology* 1988;**95**:734–9.  
11
- 12 30 Hall P, Cash J. What is the real function of the liver ‘function’ tests? *Ulster Med J*  
13 2012;**81**:30–6.  
14
- 15 31 van Buuren S, Groothuis-Oudshoorn K. mice: Multivariate Imputation by Chained  
16 Equations in R. *J Stat Softw* 2011;**45**. doi:10.18637/jss.v045.i03  
17
- 18 32 Uno H, Cai T, Tian L, *et al*. Evaluating Prediction Rules for t-Year Survivors With  
19 Censored Regression Models. *J Am Stat Assoc* 2007;**102**:527–37.  
20
- 21 33 Stone M. Cross-validatory choice and assessment of statistical predictions. *J R Stat Soc*  
22 1974;**36**:111–33.  
23
- 24 34 Efron B, Tibshirani RJ. *An Introduction to the Bootstrap*. CRC Press 1994.  
25
- 26 35 Docherty AB, Mulholland RH, Lone NI, *et al*. Changes in in-hospital mortality in the first  
27 wave of COVID-19: a multicentre prospective observational cohort study using the WHO  
28 Clinical Characterisation Protocol UK. *Lancet Respir Med* Published Online First: 14 May  
29 2021. doi:10.1016/S2213-2600(21)00175-2  
30
- 31 36 Doidge JC, Gould DW, Ferrando-Vivas P, *et al*. Trends in Intensive Care for Patients with  
32 COVID-19 in England, Wales, and Northern Ireland. *Am J Respir Crit Care Med*  
33 2021;**203**:565–74.  
34
- 35 37 Vahidy FS, Drews AL, Masud FN, *et al*. Characteristics and Outcomes of COVID-19  
36 Patients During Initial Peak and Resurgence in the Houston Metropolitan Area. *JAMA*  
37 2020;**324**:998–1000.  
38
- 39 38 WHO Solidarity trial consortium, Pan H, Peto R, *et al*. Repurposed antiviral drugs for  
40 COVID-19 –interim WHO SOLIDARITY trial results. bioRxiv. 2020.  
41 doi:10.1101/2020.10.15.20209817  
42
- 43 39 Sanders JM, Monogue ML, Jodlowski TZ, *et al*. Pharmacologic Treatments for Coronavirus  
44 Disease 2019 (COVID-19): A Review. *JAMA* 2020;**323**:1824–36.  
45
- 46 40 Sheahan TP, Sims AC, Leist SR, *et al*. Comparative therapeutic efficacy of remdesivir and  
47 combination lopinavir, ritonavir, and interferon beta against MERS-CoV. *Nat Commun*  
48 2020;**11**:222.  
49
- 50 41 Gautret P, Lagier J-C, Parola P, *et al*. Hydroxychloroquine and azithromycin as a treatment  
51  
52  
53  
54  
55  
56  
57  
58  
59  
60

- of COVID-19: results of an open-label non-randomized clinical trial. *Int J Antimicrob Agents* 2020;**56**:105949.
- 42 Spinner CD, Gottlieb RL, Criner GJ, *et al*. Effect of Remdesivir vs Standard Care on Clinical Status at 11 Days in Patients With Moderate COVID-19: A Randomized Clinical Trial. *JAMA* 2020;**324**:1048–57.
- 43 Wang Y, Zhang D, Du G, *et al*. Remdesivir in adults with severe COVID-19: a randomised, double-blind, placebo-controlled, multicentre trial. *Lancet* 2020;**395**:1569–78.
- 44 Boulware DR, Pullen MF, Bangdiwala AS, *et al*. A Randomized Trial of Hydroxychloroquine as Postexposure Prophylaxis for Covid-19. *N Engl J Med* 2020;**383**:517–25.
- 45 Mitjà O, Corbacho-Monné M, Ubals M, *et al*. A Cluster-Randomized Trial of Hydroxychloroquine for Prevention of Covid-19. *N Engl J Med* 2021;**384**:417–27.
- 46 Self WH, Semler MW, Leither LM, *et al*. Effect of Hydroxychloroquine on Clinical Status at 14 Days in Hospitalized Patients With COVID-19: A Randomized Clinical Trial. *JAMA* 2020;**324**:2165–76.
- 47 WHO Solidarity Trial Consortium, Pan H, Peto R, *et al*. Repurposed Antiviral Drugs for Covid-19 - Interim WHO Solidarity Trial Results. *N Engl J Med* 2021;**384**:497–511.
- 48 Weber GM, Zhang HG, L'Yi S, *et al*. International changes in COVID-19 clinical trajectories across 315 hospitals and 6 countries: A 4CE consortium study (preprint). *JMIR Preprints*. 2021. doi:10.2196/preprints.31400
- 49 Poissy J, Goutay J, Caplan M, *et al*. Pulmonary Embolism in Patients With COVID-19: Awareness of an Increased Prevalence. *Circulation* 2020;**142**:184–6.
- 50 Clouston SAP, Luft BJ, Sun E. Clinical risk factors for mortality in an analysis of 1375 patients admitted for COVID treatment. *Sci Rep* 2021;**11**:23414.
- 51 Cueto-Manzano AM, Espinel-Bermúdez MC, Hernández-González SO, *et al*. Risk factors for mortality of adult patients with COVID-19 hospitalised in an emerging country: a cohort study. *BMJ Open* 2021;**11**:e050321.
- 52 Yu D, Du Q, Yan S, *et al*. Liver injury in COVID-19: clinical features and treatment management. *Virol J* 2021;**18**:121.
- 53 Cohen JB, D'Agostino McGowan L, Jensen ET, *et al*. Evaluating sources of bias in observational studies of angiotensin-converting enzyme inhibitor/angiotensin II receptor blocker use during COVID-19: beyond confounding. *J Hypertens* 2021;**39**:795–805.
- 54 RECOVERY Collaborative Group, Horby P, Lim WS, *et al*. Dexamethasone in Hospitalized Patients with Covid-19. *N Engl J Med* 2021;**384**:693–704.



- 1  
2  
3 55 Kim W-Y, Kweon OJ, Cha MJ, *et al.* Dexamethasone may improve severe COVID-19 via  
4 ameliorating endothelial injury and inflammation: A preliminary pilot study. *PLoS One*  
5 2021;**16**:e0254167.  
6  
7  
8 56 Garibaldi BT, Wang K, Robinson ML, *et al.* Comparison of Time to Clinical Improvement  
9 With vs Without Remdesivir Treatment in Hospitalized Patients With COVID-19. *JAMA*  
10 *Netw Open* 2021;**4**:e213071.  
11  
12 57 Thachil J, Juffermans NP, Ranucci M, *et al.* ISTH DIC subcommittee communication on  
13 anticoagulation in COVID-19. *J Thromb Haemost* 2020;**18**:2138–44.  
14  
15 58 Helms J, Tacquard C, Severac F, *et al.* High risk of thrombosis in patients with severe  
16 SARS-CoV-2 infection: a multicenter prospective cohort study. *Intensive Care Med*  
17 2020;**46**:1089–98.  
18  
19 59 Criel M, Falter M, Jaeken J, *et al.* Venous thromboembolism in SARS-CoV-2 patients: only  
20 a problem in ventilated ICU patients, or is there more to it? *Eur Respir J* 2020;**56**.  
21 doi:10.1183/13993003.01201-2020  
22  
23 60 Yu B, Li X, Chen J, *et al.* Evaluation of variation in D-dimer levels among COVID-19 and  
24 bacterial pneumonia: a retrospective analysis. *J Thromb Thrombolysis* 2020;**50**:548–57.  
25  
26 61 Dessie ZG, Zewotir T. Mortality-related risk factors of COVID-19: a systematic review and  
27 meta-analysis of 42 studies and 423,117 patients. *BMC Infect Dis* 2021;**21**:855.  
28  
29 62 Albitar O, Ballouze R, Ooi JP, *et al.* Risk factors for mortality among COVID-19 patients.  
30 *Diabetes Res Clin Pract* 2020;**166**:108293.  
31  
32 63 Cai Q, Huang D, Yu H, *et al.* COVID-19: Abnormal liver function tests. *J Hepatol*  
33 2020;**73**:566–74.  
34  
35 64 Jenniskens M, Langouche L, Vanwijngaerden Y-M, *et al.* Cholestatic liver (dys)function  
36 during sepsis and other critical illnesses. *Intensive Care Med* 2016;**42**:16–27.  
37  
38 65 Cardoso FS, Pereira R, Germano N. Liver injury in critically ill patients with COVID-19: a  
39 case series. *Crit Care* 2020;**24**:190.  
40  
41 66 Lagana SM, Kudose S, Iuga AC, *et al.* Hepatic pathology in patients dying of COVID-19: a  
42 series of 40 cases including clinical, histologic, and virologic data. *Mod Pathol*  
43 2020;**33**:2147–55.  
44  
45 67 Klann JG, Strasser ZH, Hutch MR, *et al.* Distinguishing Admissions Specifically for  
46 COVID-19 from Incidental SARS-CoV-2 Admissions: A National EHR Research  
47 Consortium Study. *medRxiv* 2022;:2022.02.10.22270728.  
48  
49  
50  
51  
52  
53  
54  
55  
56  
57  
58  
59

**Figure 1: Demographic shifts. For demographics variables, we set male sex, age 50-69, and White race as reference groups.**





**Figure 2: Distribution of laboratory values at admission.**

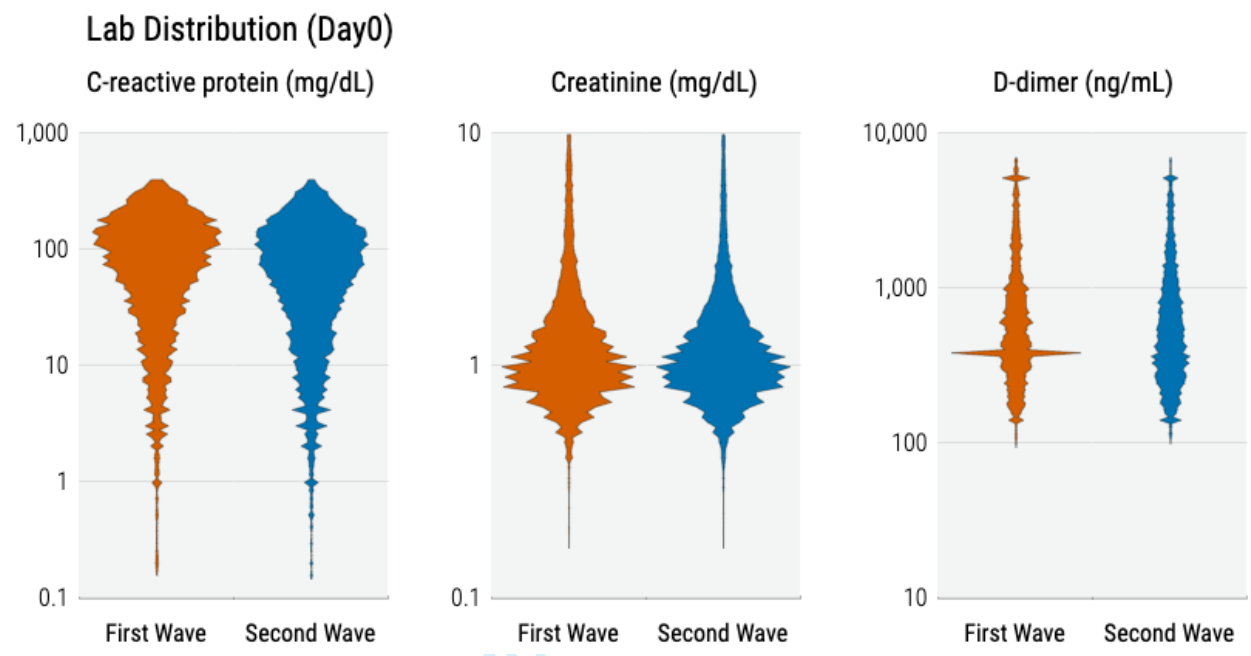

er review only

**Figure 3: Patient-level laboratory recovery rate.**

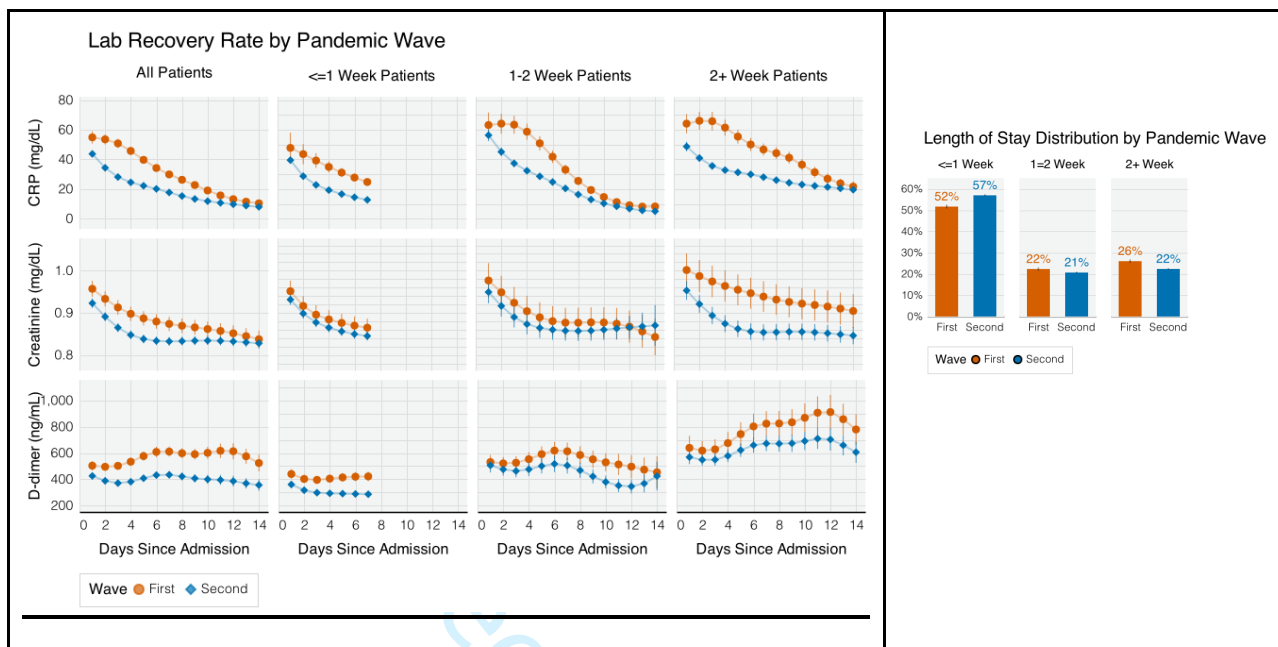

**Figure 4. Hazard ratio of the Cox model for mortality risk prediction (excluding Italy)**

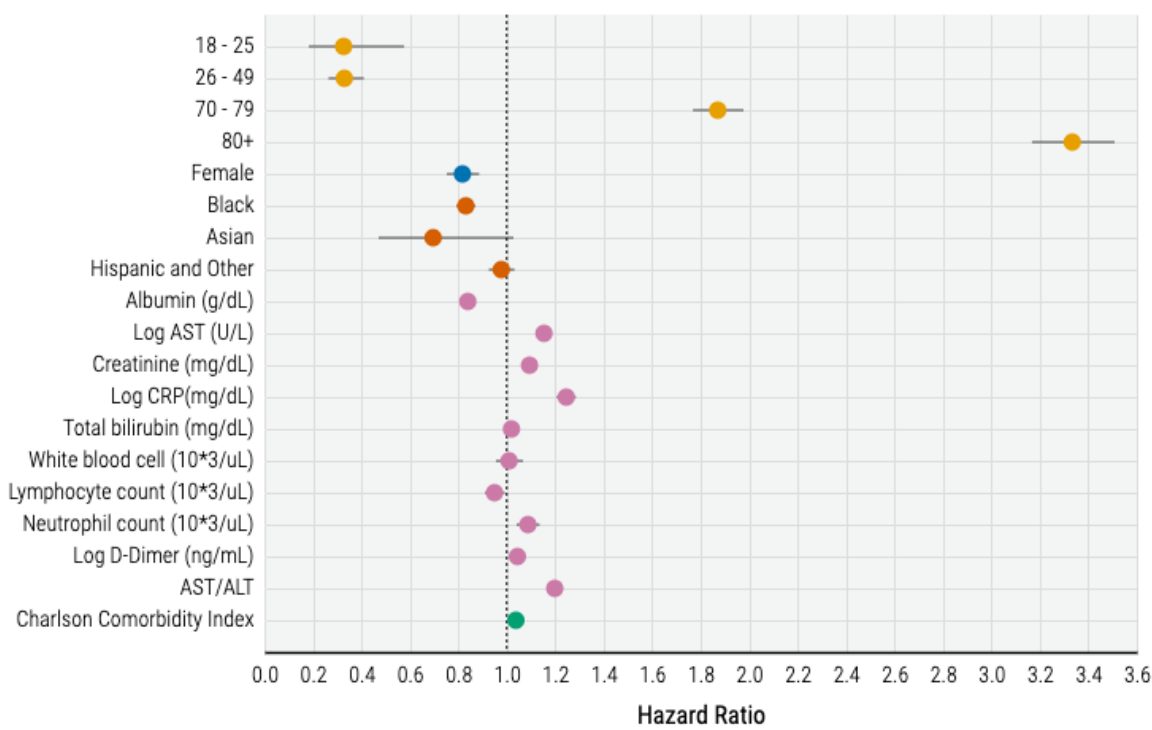

review only

**Figure 5: Risk model results w/event rate information and risk stratification.**



## SUPPLEMENTARY FIGURES

---

Supplementary eTable 1: Participating hospitals.

Supplementary eFigure 1: Schematic of the federated EHR-based study involving healthcare systems from five countries.

Supplementary eFigure 2: Country-level demographic shifts.

Supplementary eFigure 3: Country-level Distribution of laboratory values at admission.

Supplementary eFigure 4: Patient-level laboratory recovery rate. (a) country-level changes in the recovery rates of laboratory measures (excluding Germany and Italy due to the small number of patients with longitudinal laboratory measurements available); (b) distribution of length of hospital stay among patients admitted in the first wave and in the second wave.

Supplementary eFigure 5: Country-level hazard ratio of the Cox model for mortality risk prediction (excluding Italy).

Supplementary eFigure 6. AUC of the Cox regression model for mortality risk prediction (excluding Italy).

Supplementary eFigure 7: Country-level risk model results w/ event rate information and risk stratification (excluding Italy).

**eTable 1: Participating healthcare systems. The 170 US Veterans Affairs (VA) hospitals were grouped into 5 regional healthcare systems [1].**

| Healthcare system                          | Acronym | Country | City                          | Hospitals | Beds   | Inpatient discharges/year |
|--------------------------------------------|---------|---------|-------------------------------|-----------|--------|---------------------------|
| Assistance Publique - Hôpitaux de Paris    | APHP    | France  | Paris                         | 39        | 20 098 | 1 375 538                 |
| Beth Israel Deaconess Medical Center       | BIDMC   | USA     | Boston, MA                    | 1         | 673    | 40 752                    |
| Bordeaux University Hospital               | FRBDX   | France  | Bordeaux                      | 3         | 2 676  | 130 033                   |
| Hospital Universitario 12 de Octubre       | H12O    | Spain   | Madrid                        | 1         | 1 256  | 45 035                    |
| ICSM Hospitals                             | ICSM    | Italy   | Pavia/Milan/Lumezzane/Brescia | 3         | 775    | 12 344                    |
| Mass General Brigham (Partners Healthcare) | MGB     | USA     | Boston, MA                    | 10        | 3 418  | 163 521                   |
| Northwestern University                    | NWU     | USA     | Chicago, IL                   | 10        | 2 234  | 103 279                   |
| University of California, LA               | UCLA    | USA     | Los Angeles, CA               | 2         | 786    | 40 526                    |
| University of Kansas Medical Center        | KUMC    | USA     | Kansas City, KS               | 1         | 794    | 54 659                    |
| University of Freiburg, Medical Center     | UKFR    | Germany | Freiburg                      | 1         | 1 660  | 71 500                    |
| University of Michigan                     | UMICH   | USA     | Ann Arbor, MI                 | 3         | 1000   | 49 008                    |
| University of Pennsylvania                 | UPENN   | USA     | Philadelphia, PA              | 5         | 2 469  | 118 188                   |
| University of Pittsburgh                   | UPITT   | USA     | Pittsburgh, PA                | 39        | 8 085  | 369 300                   |
| VA North Atlantic                          | VA1     | USA     |                               | 49        | 3 594  | 151 075                   |
| VA Southwest                               | VA2     | USA     |                               | 29        | 3 115  | 156 315                   |
| VA Midwest                                 | VA3     | USA     |                               | 39        | 2 686  | 145 468                   |
| VA Continental                             | VA4     | USA     |                               | 24        | 2 110  | 113 260                   |
| VA Pacific                                 | VA5     | USA     |                               | 29        | 2 296  | 114 569                   |
| Total                                      |         |         |                               | 288       | 59 725 | 3 254 370                 |

eFigure 1. Schematic of the federated EHR-based study involving healthcare systems from five countries. (created with BioRender.com )

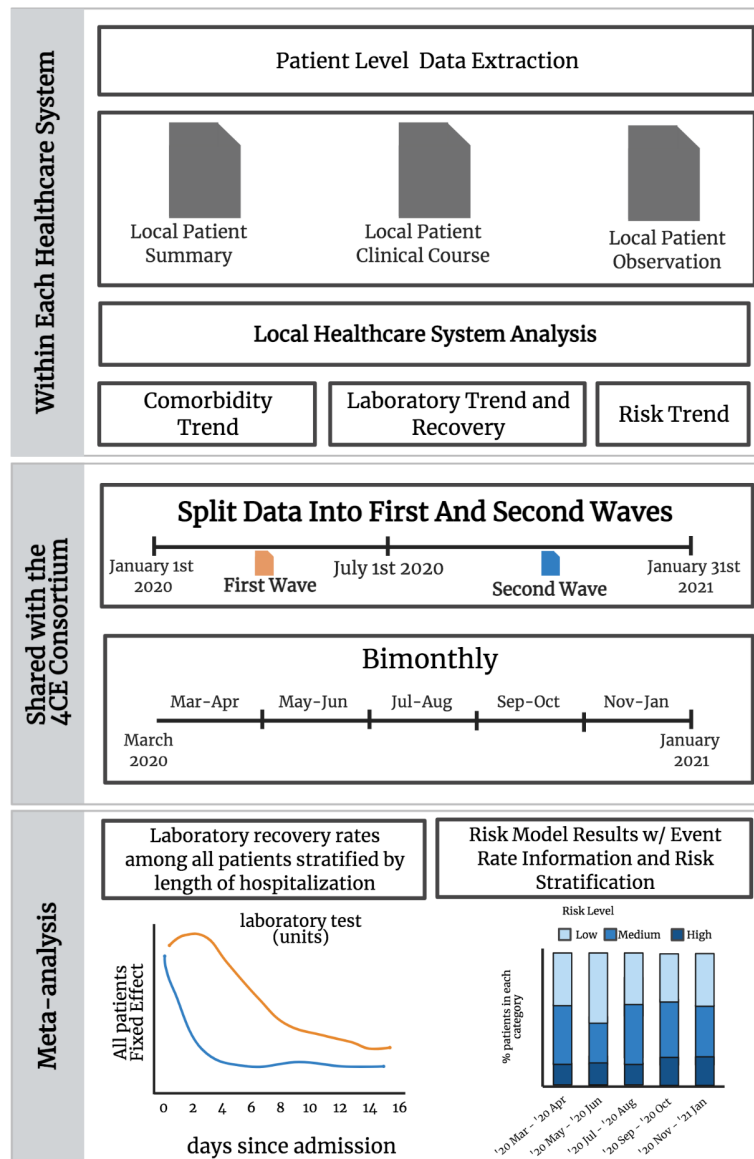

Remark: The hospitalization rate over time tends to differ across regions and across countries, in part due to heterogeneity in a wide range of regional factors including community morbidity and local social distancing policy. This results in different relative sample sizes across healthcare centers over time. To ensure that the temporal trends in clinical presentations summarized via meta-analysis combining all healthcare centers are not driven by the temporal change in the relative sample sizes, we used the same weight for each healthcare center across different calendar months.

eFigure 2. Country-level demographic shifts.





eFigure 3. Country-level Distribution of laboratory values at admission. The Italy site had a relatively low percentage of patients with laboratory measurements which may have led to less precise estimates in these laboratory changes.

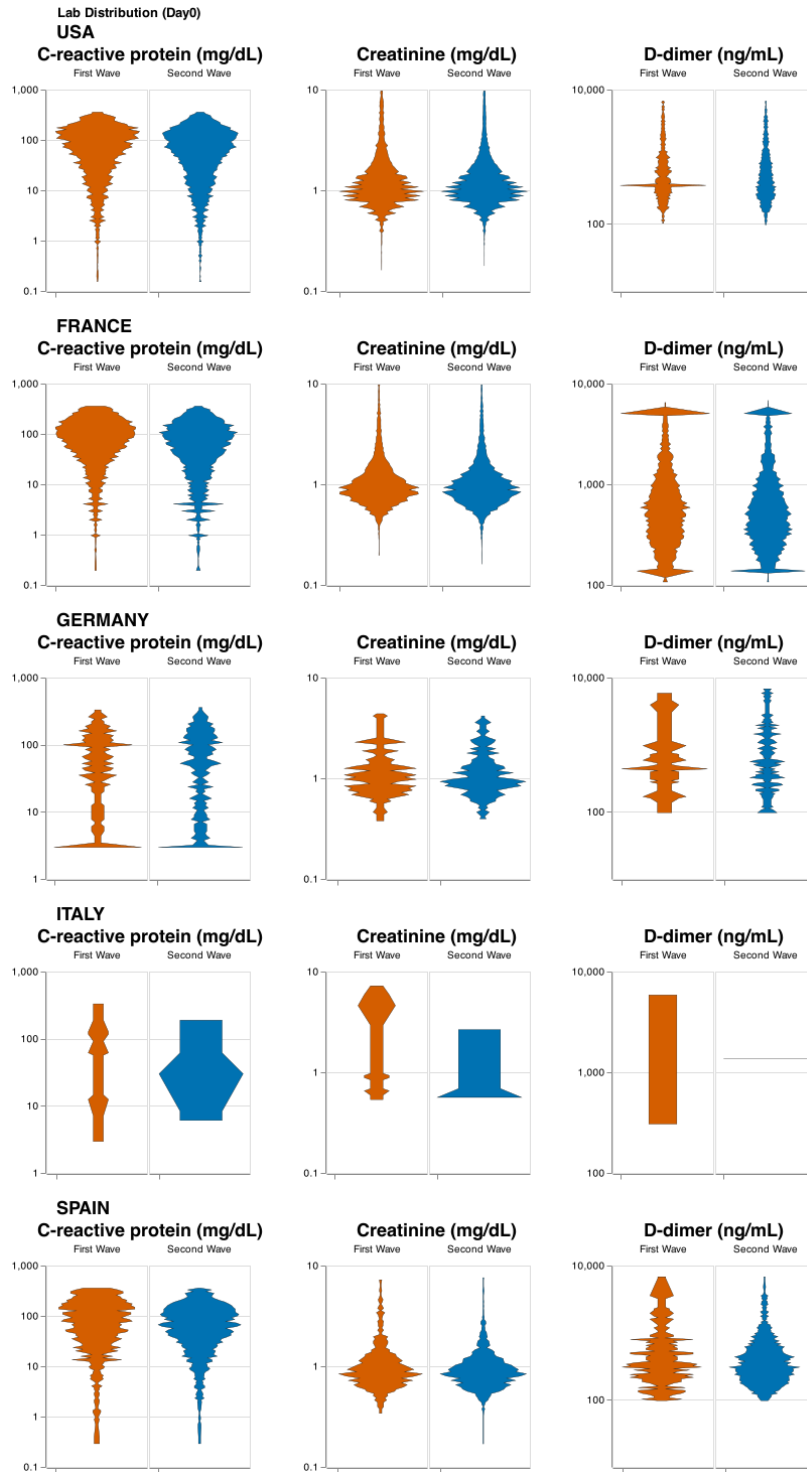

eFigure 4. Patient-level laboratory recovery rate. (a) country-level changes in the recovery rates of laboratory measures (excluding Germany and Italy due to the small number of patients with longitudinal laboratory measurements available); (b) distribution of length of hospital stay among patients admitted in the first wave and in the second wave

(a) country-level changes in the recovery rates of laboratory measures

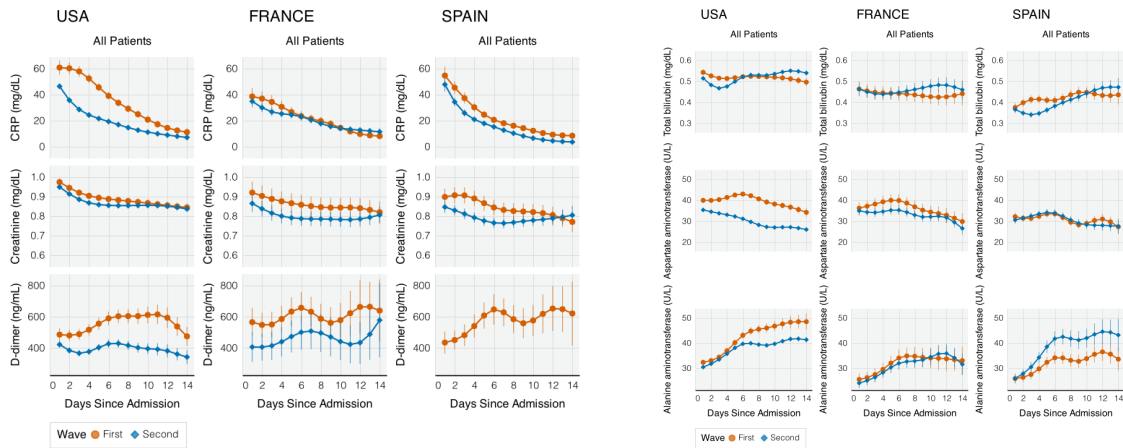

(b) Distribution of length of hospital stay among patients admitted in the first wave and in the second wave



eFigure 5. Hazard ratio of the Cox model for mortality risk prediction (excluding Italy).

1  
2  
3  
4  
5  
6  
7  
8  
9  
10  
11  
12  
13  
14  
15  
16  
17  
18  
19  
20  
21  
22  
23  
24  
25  
26  
27  
28  
29  
30  
31  
32  
33  
34  
35  
36  
37  
38  
39  
40  
41  
42  
43  
44  
45  
46  
47  
48  
49  
50  
51  
52  
53  
54  
55  
56  
57  
58  
59  
60

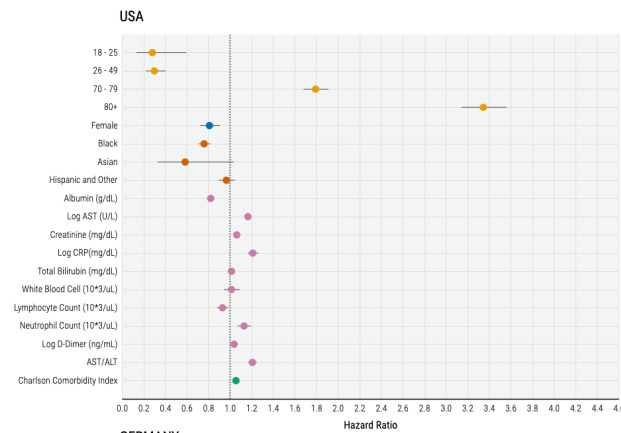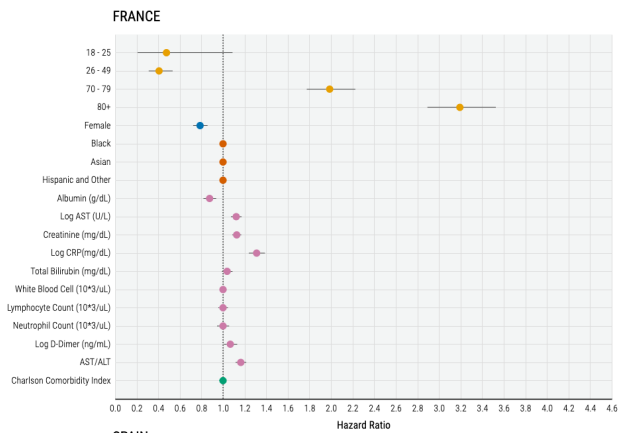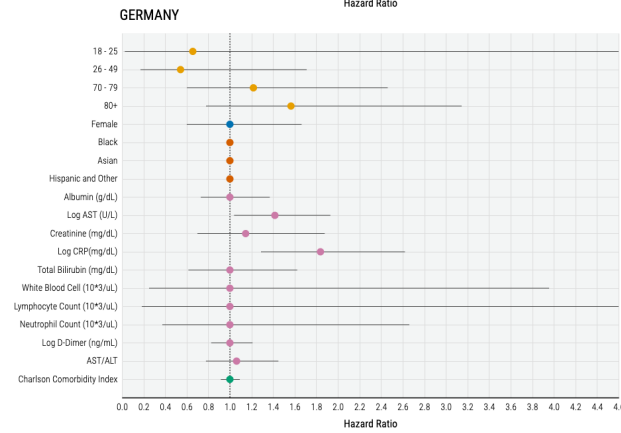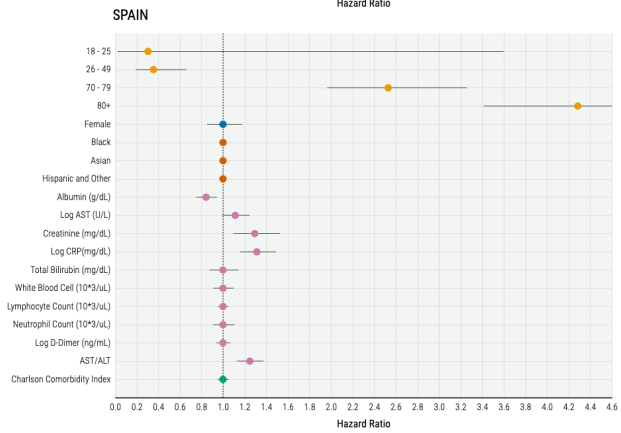

**eFigure 6. AUC of the Cox regression model for mortality risk prediction (excluding Italy).**

**(a) Meta-analysis over all countries.**

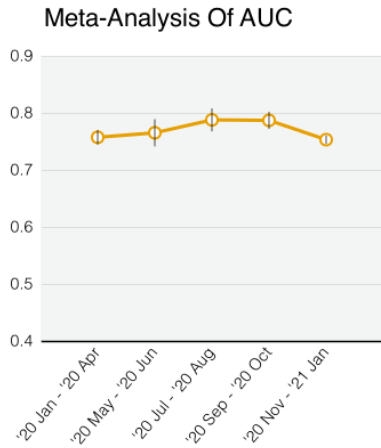

**(b) Country-level AUC over time. AUC was not reported for May–June 2020, and July–August 2020 in Germany due to small counts of death occurring during these months.**

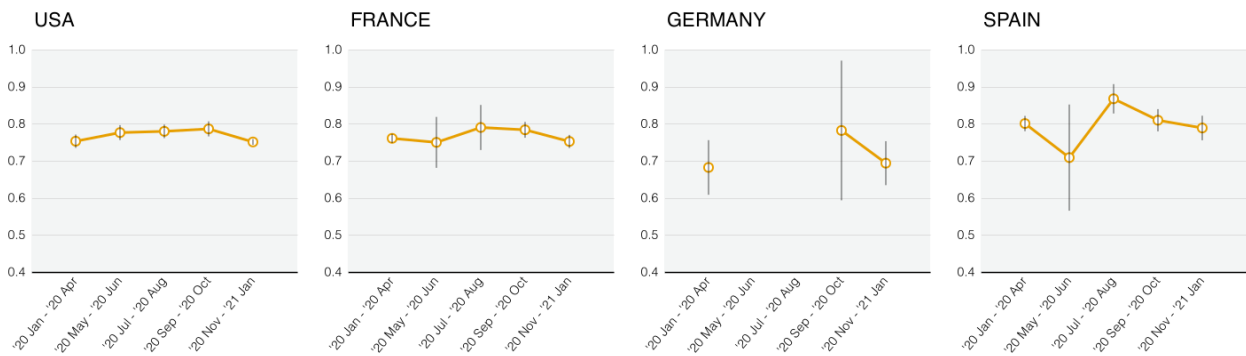

eFigure 7. Country-level risk model results w/ event rate information and risk stratification (excluding Italy).



1. Jones AL, Petty WBP, Carter ME, Brignone E, Redd A, Suo Y, et al. Regional Variations in Documentation of Sexual Trauma Concepts in Electronic Medical Records in the United States Veterans Health Administration. AMIA Annu Symp Proc. 2019;2019: 514–522.

STROBE Statement—Checklist of items that should be included in reports of *cohort studies*

|                              | Item No | Recommendation                                                                                                                                                                                                                                                                                                         | Page No                   |
|------------------------------|---------|------------------------------------------------------------------------------------------------------------------------------------------------------------------------------------------------------------------------------------------------------------------------------------------------------------------------|---------------------------|
| <b>Title and abstract</b>    | 1       | (a) Indicate the study's design with a commonly used term in the title or the abstract                                                                                                                                                                                                                                 | 1                         |
|                              |         | (b) Provide in the abstract an informative and balanced summary of what was done and what was found                                                                                                                                                                                                                    | 3-4                       |
| <b>Introduction</b>          |         |                                                                                                                                                                                                                                                                                                                        |                           |
| Background/rationale         | 2       | Explain the scientific background and rationale for the investigation being reported                                                                                                                                                                                                                                   | 5                         |
| Objectives                   | 3       | State specific objectives, including any prespecified hypotheses                                                                                                                                                                                                                                                       | 5                         |
| <b>Methods</b>               |         |                                                                                                                                                                                                                                                                                                                        |                           |
| Study design                 | 4       | Present key elements of study design early in the paper                                                                                                                                                                                                                                                                | 5                         |
| Setting                      | 5       | Describe the setting, locations, and relevant dates, including periods of recruitment, exposure, follow-up, and data collection                                                                                                                                                                                        | 6                         |
| Participants                 | 6       | (a) Give the eligibility criteria, and the sources and methods of selection of participants. Describe methods of follow-up<br>(b) For matched studies, give matching criteria and number of exposed and unexposed                                                                                                      | 6                         |
| Variables                    | 7       | Clearly define all outcomes, exposures, predictors, potential confounders, and effect modifiers. Give diagnostic criteria, if applicable                                                                                                                                                                               | 6-7                       |
| Data sources/<br>measurement | 8*      | For each variable of interest, give sources of data and details of methods of assessment (measurement). Describe comparability of assessment methods if there is more than one group                                                                                                                                   | 6                         |
| Bias                         | 9       | Describe any efforts to address potential sources of bias                                                                                                                                                                                                                                                              | 11                        |
| Study size                   | 10      | Explain how the study size was arrived at                                                                                                                                                                                                                                                                              | 6                         |
| Quantitative variables       | 11      | Explain how quantitative variables were handled in the analyses. If applicable, describe which groupings were chosen and why                                                                                                                                                                                           | 7                         |
| Statistical methods          | 12      | (a) Describe all statistical methods, including those used to control for confounding<br>(b) Describe any methods used to examine subgroups and interactions<br>(c) Explain how missing data were addressed<br>(d) If applicable, explain how loss to follow-up was addressed<br>(e) Describe any sensitivity analyses | 6-7<br>6-7<br>7<br>7<br>7 |
| <b>Results</b>               |         |                                                                                                                                                                                                                                                                                                                        |                           |

1  
2  
3  
4  
5  
6  
7  
8  
9  
10  
11  
12  
13  
14  
15  
16  
17  
18  
19  
20  
21  
22  
23  
24  
25  
26  
27  
28  
29  
30  
31  
32  
33  
34  
35  
36  
37  
38  
39  
40  
41  
42  
43  
44  
45  
46  
47  
48  
49  
50  
51  
52  
53  
54  
55  
56  
57  
58  
59  
60

|                  |     |                                                                                                                                                                                                                                                                                                         |            |
|------------------|-----|---------------------------------------------------------------------------------------------------------------------------------------------------------------------------------------------------------------------------------------------------------------------------------------------------------|------------|
| Participants     | 13* | (a) Report numbers of individuals at each stage of study—eg numbers potentially eligible, examined for eligibility, confirmed eligible, included in the study, completing follow-up, and analysed<br><br>(b) Give reasons for non-participation at each stage<br><br>(c) Consider use of a flow diagram | 8          |
| Descriptive data | 14* | (a) Give characteristics of study participants (eg demographic, clinical, social) and information on exposures and potential confounders<br><br>(b) Indicate number of participants with missing data for each variable of interest<br><br>(c) Summarise follow-up time (eg, average and total amount)  | 8<br><br>8 |
| Outcome data     | 15* | Report numbers of outcome events or summary measures over time                                                                                                                                                                                                                                          | 8-9        |

|    |                          |    |                                                                                                                                                                                                              |
|----|--------------------------|----|--------------------------------------------------------------------------------------------------------------------------------------------------------------------------------------------------------------|
| 1  |                          |    |                                                                                                                                                                                                              |
| 2  | Main results             | 16 | (a) Give unadjusted estimates and, if applicable, confounder-adjusted estimates and their precision (eg, 95% confidence interval). Make clear which confounders were adjusted for and why they were included |
| 3  |                          |    |                                                                                                                                                                                                              |
| 4  |                          |    |                                                                                                                                                                                                              |
| 5  |                          |    |                                                                                                                                                                                                              |
| 6  |                          |    | (b) Report category boundaries when continuous variables were categorized                                                                                                                                    |
| 7  |                          |    |                                                                                                                                                                                                              |
| 8  |                          |    | (c) If relevant, consider translating estimates of relative risk into absolute risk for a meaningful time period                                                                                             |
| 9  |                          |    |                                                                                                                                                                                                              |
| 10 |                          |    |                                                                                                                                                                                                              |
| 11 | Other analyses           | 17 | Report other analyses done—eg analyses of subgroups and interactions, and sensitivity analyses                                                                                                               |
| 12 |                          |    |                                                                                                                                                                                                              |
| 13 |                          |    |                                                                                                                                                                                                              |
| 14 |                          |    |                                                                                                                                                                                                              |
| 15 | <b>Discussion</b>        |    |                                                                                                                                                                                                              |
| 16 |                          |    |                                                                                                                                                                                                              |
| 17 | Key results              | 18 | Summarise key results with reference to study objectives                                                                                                                                                     |
| 18 |                          |    |                                                                                                                                                                                                              |
| 19 | Limitations              | 19 | Discuss limitations of the study, taking into account sources of potential bias or imprecision. Discuss both direction and magnitude of any potential bias                                                   |
| 20 |                          |    |                                                                                                                                                                                                              |
| 21 |                          |    |                                                                                                                                                                                                              |
| 22 | Interpretation           | 20 | Give a cautious overall interpretation of results considering objectives, limitations, multiplicity of analyses, results from similar studies, and other relevant evidence                                   |
| 23 |                          |    |                                                                                                                                                                                                              |
| 24 |                          |    |                                                                                                                                                                                                              |
| 25 | Generalisability         | 21 | Discuss the generalisability (external validity) of the study results                                                                                                                                        |
| 26 |                          |    |                                                                                                                                                                                                              |
| 27 |                          |    |                                                                                                                                                                                                              |
| 28 |                          |    |                                                                                                                                                                                                              |
| 29 | <b>Other information</b> |    |                                                                                                                                                                                                              |
| 30 |                          |    |                                                                                                                                                                                                              |
| 31 | Funding                  | 22 | Give the source of funding and the role of the funders for the present study and, if applicable, for the original study on which the present article is based                                                |
| 32 |                          |    |                                                                                                                                                                                                              |
| 33 |                          |    |                                                                                                                                                                                                              |
| 34 |                          |    |                                                                                                                                                                                                              |
| 35 |                          |    |                                                                                                                                                                                                              |

\*Give information separately for exposed and unexposed groups.

**Note:** An Explanation and Elaboration article discusses each checklist item and gives methodological background and published examples of transparent reporting. The STROBE checklist is best used in conjunction with this article (freely available on the Web sites of PLoS Medicine at <http://www.plosmedicine.org/>, Annals of Internal Medicine at <http://www.annals.org/>, and Epidemiology at <http://www.epidem.com/>). Information on the STROBE Initiative is available at <http://www.strobe-statement.org>.



# BMJ Open

## Changes in laboratory value improvement and mortality rates over the course of the pandemic: an international retrospective cohort study of hospitalized patients infected with SARS-CoV-2

|                               |                                                                                                                                                                                                                                                                                                                                                                                                                                                                                                                                                                                                                                                                                                                                                                                                                                                                                                                                                                                                                                                                                                                                                                                                                                                                                                                                                                                                                                                                                                                                                                                                                                                                                                                                                                                                                                                                                                                                                                                                                                                                    |
|-------------------------------|--------------------------------------------------------------------------------------------------------------------------------------------------------------------------------------------------------------------------------------------------------------------------------------------------------------------------------------------------------------------------------------------------------------------------------------------------------------------------------------------------------------------------------------------------------------------------------------------------------------------------------------------------------------------------------------------------------------------------------------------------------------------------------------------------------------------------------------------------------------------------------------------------------------------------------------------------------------------------------------------------------------------------------------------------------------------------------------------------------------------------------------------------------------------------------------------------------------------------------------------------------------------------------------------------------------------------------------------------------------------------------------------------------------------------------------------------------------------------------------------------------------------------------------------------------------------------------------------------------------------------------------------------------------------------------------------------------------------------------------------------------------------------------------------------------------------------------------------------------------------------------------------------------------------------------------------------------------------------------------------------------------------------------------------------------------------|
| Journal:                      | <i>BMJ Open</i>                                                                                                                                                                                                                                                                                                                                                                                                                                                                                                                                                                                                                                                                                                                                                                                                                                                                                                                                                                                                                                                                                                                                                                                                                                                                                                                                                                                                                                                                                                                                                                                                                                                                                                                                                                                                                                                                                                                                                                                                                                                    |
| Manuscript ID                 | bmjopen-2021-057725.R2                                                                                                                                                                                                                                                                                                                                                                                                                                                                                                                                                                                                                                                                                                                                                                                                                                                                                                                                                                                                                                                                                                                                                                                                                                                                                                                                                                                                                                                                                                                                                                                                                                                                                                                                                                                                                                                                                                                                                                                                                                             |
| Article Type:                 | Original research                                                                                                                                                                                                                                                                                                                                                                                                                                                                                                                                                                                                                                                                                                                                                                                                                                                                                                                                                                                                                                                                                                                                                                                                                                                                                                                                                                                                                                                                                                                                                                                                                                                                                                                                                                                                                                                                                                                                                                                                                                                  |
| Date Submitted by the Author: | 30-May-2022                                                                                                                                                                                                                                                                                                                                                                                                                                                                                                                                                                                                                                                                                                                                                                                                                                                                                                                                                                                                                                                                                                                                                                                                                                                                                                                                                                                                                                                                                                                                                                                                                                                                                                                                                                                                                                                                                                                                                                                                                                                        |
| Complete List of Authors:     | <p>Hong, Chuan; Harvard Medical School, Department of Biomedical Informatics</p> <p>Zhang, Harrison; Harvard Medical School, Department of Biomedical Informatics</p> <p>L'Yi, Sehi; Harvard Medical School, Department of Biomedical Informatics</p> <p>Weber, Griffin; Harvard Medical School, Department of Biomedical Informatics</p> <p>Avillach, Paul; Harvard Medical School, Department of Biomedical Informatics</p> <p>Tan, Bryce; National University Hospital, Department of Medicine</p> <p>Gutiérrez-Sacristán, Alba; Harvard Medical School, Department of Biomedical Informatics</p> <p>Bonzel, Clara-Lea; Harvard Medical School, Department of Biomedical Informatics</p> <p>Palmer, Nathan; Harvard Medical School, Department of Biomedical Informatics</p> <p>Malovini, Alberto; Istituti Clinici Scientifici Maugeri SpA SB IRCCS, Laboratory of Informatics and Systems Engineering for Clinical Research</p> <p>Tibollo, Valentina; Istituti Clinici Scientifici Maugeri SpA SB IRCCS, Laboratory of Informatics and Systems Engineering for Clinical Research</p> <p>Luo, Yuan; Northwestern University, Department of Preventive Medicine</p> <p>Hutch, Meghan; Northwestern University, Department of Preventive Medicine</p> <p>Liu, Molei; Harvard University T H Chan School of Public Health, Department of Biostatistics</p> <p>Bourgeois, Florence; Harvard Medical School, Department of Pediatrics</p> <p>Bellazzi, Riccardo; University of Pavia, Department of Electrical, Computer and Biomedical Engineering</p> <p>Chiovato, Luca; Istituti Clinici Scientifici Maugeri SpA SB IRCCS, Unit of Internal Medicine and Endocrinology</p> <p>Sanz Vidorreta, Fernando; David Geffen School of Medicine, Department of Medicine</p> <p>Le, Trang; University of Pennsylvania Perelman School of Medicine, Department of Biostatistics, Epidemiology, and Informatics</p> <p>Wang, Xuan; Harvard Medical School, Department of Biomedical Informatics</p> <p>Yuan, William; Harvard Medical School, Department of Biomedical</p> |

|    |                                                                                                                                                                                                                                        |
|----|----------------------------------------------------------------------------------------------------------------------------------------------------------------------------------------------------------------------------------------|
| 1  |                                                                                                                                                                                                                                        |
| 2  |                                                                                                                                                                                                                                        |
| 3  |                                                                                                                                                                                                                                        |
| 4  | Informatics                                                                                                                                                                                                                            |
| 5  | Neuraz, Antoine; Hopital universitaire Necker-Enfants malades,<br>Department of Biomedical Informatics                                                                                                                                 |
| 6  | Benoit, Vincent; APHP Greater Paris University Hospital, IT department,<br>Innovation & Data                                                                                                                                           |
| 7  |                                                                                                                                                                                                                                        |
| 8  | Moal, Bertrand; Bordeaux University Hospital, IAM unit                                                                                                                                                                                 |
| 9  | Morris, Michele; University of Pittsburgh, Department of Biomedical<br>Informatics                                                                                                                                                     |
| 10 | Hanauer, David; University of Michigan Medical School, Department of<br>Learning Health Sciences                                                                                                                                       |
| 11 | Maidlow, Sarah; University of Michigan, MICHHR Informatics                                                                                                                                                                             |
| 12 | Waghlikar, Kavishwar; Massachusetts General Hospital, Department of<br>Medicine                                                                                                                                                        |
| 13 |                                                                                                                                                                                                                                        |
| 14 | Murphy, Shawn; Massachusetts General Hospital, Neurology                                                                                                                                                                               |
| 15 | Estiri, Hossein; Massachusetts General Hospital, Department of Medicine                                                                                                                                                                |
| 16 | Makoudjou, Adeline; University of Freiburg Faculty of Medicine, Institute<br>of Medical Biometry and Statistics                                                                                                                        |
| 17 |                                                                                                                                                                                                                                        |
| 18 | Tippmann, Patric; Medical Center-University of Freiburg, Institute of<br>Medical Biometry and Statistics                                                                                                                               |
| 19 |                                                                                                                                                                                                                                        |
| 20 | Klann, Jeffery; Massachusetts General Hospital, Department of Medicine                                                                                                                                                                 |
| 21 | Follett, Robert; David Geffen School of Medicine, Department of Medicine                                                                                                                                                               |
| 22 | Gehlenborg, Nils; Harvard Medical School, Department of Biomedical<br>Informatics                                                                                                                                                      |
| 23 | Omenn, Gilbert; University of Michigan, Computational Medicine &<br>Bioinformatics                                                                                                                                                     |
| 24 |                                                                                                                                                                                                                                        |
| 25 | Xia, Zongqi; University of Pittsburgh, Department of Neurology                                                                                                                                                                         |
| 26 | Dagliati, Arianna; University of Pavia, Department of Electrical Computer<br>and Biomedical Engineering                                                                                                                                |
| 27 |                                                                                                                                                                                                                                        |
| 28 | Visweswaran, Shyam; University of Pittsburgh, Department of<br>Biomedical Informatics                                                                                                                                                  |
| 29 |                                                                                                                                                                                                                                        |
| 30 | Patel, Lav; University of Kansas Medical Center, Department of Internal<br>Medicine, Division of Medical Informatics                                                                                                                   |
| 31 | Mowery, Danielle; University of Pennsylvania Perelman School of<br>Medicine, Department of Biostatistics, Epidemiology, and Informatics                                                                                                |
| 32 | Schriver, Emily; University of Pennsylvania Health System, Data<br>Analytics Center                                                                                                                                                    |
| 33 |                                                                                                                                                                                                                                        |
| 34 | Samayamuthu, Malarkodi Jebathilagam; University of Pittsburgh,<br>Biomedical Informatics                                                                                                                                               |
| 35 |                                                                                                                                                                                                                                        |
| 36 | Kavuluru, Ramakanth ; University of Kentucky, Institute for Biomedical<br>Informatics                                                                                                                                                  |
| 37 |                                                                                                                                                                                                                                        |
| 38 | Lozano-Zahonero, Sara; University of Freiburg Faculty of Medicine,<br>Institute of Medical Biometry and Statistics                                                                                                                     |
| 39 |                                                                                                                                                                                                                                        |
| 40 | Zöller, Daniela; University of Freiburg Faculty of Medicine, Institute of<br>Medical Biometry and Statistics                                                                                                                           |
| 41 |                                                                                                                                                                                                                                        |
| 42 | Tan, Amelia; Harvard Medical School, Department of Biomedical<br>Informatics                                                                                                                                                           |
| 43 |                                                                                                                                                                                                                                        |
| 44 | Tan, Byorn; National University Hospital, Department of Medicine                                                                                                                                                                       |
| 45 | Ngiam, Kee Yuan; National University Hospital, Department of Surgery                                                                                                                                                                   |
| 46 | Holmes, John; University of Pennsylvania Perelman School of Medicine,<br>Department of Biostatistics, Epidemiology and Informatics; University of<br>Pennsylvania Perelman School of Medicine, Institute for Biomedical<br>Informatics |
| 47 |                                                                                                                                                                                                                                        |
| 48 | Schubert, Petra; VA Boston Healthcare System, Massachusetts Veterans<br>Epidemiology Research and Information Center (MAVERIC)                                                                                                         |
| 49 |                                                                                                                                                                                                                                        |
| 50 | Cho, Kelly; VA Boston Healthcare System, Massachusetts Veterans<br>Epidemiology Research and Information Center (MAVERIC)                                                                                                              |
| 51 |                                                                                                                                                                                                                                        |
| 52 | Ho, Yuk-Lam; VA Boston Healthcare System, Massachusetts Veterans<br>Epidemiology Research and Information Center (MAVERIC)                                                                                                             |
| 53 |                                                                                                                                                                                                                                        |
| 54 | Beaulieu-Jones, Brett K. ; Harvard Medical School, Biomedical<br>Informatics                                                                                                                                                           |
| 55 |                                                                                                                                                                                                                                        |
| 56 | Pedreira-Jiménez, Miguel; Hospital Universitario 12 de Octubre, Health                                                                                                                                                                 |
| 57 |                                                                                                                                                                                                                                        |
| 58 |                                                                                                                                                                                                                                        |
| 59 |                                                                                                                                                                                                                                        |
| 60 |                                                                                                                                                                                                                                        |

|                                 |                                                                                                                                                                                                                                                                                                                                                                                                                                                                                                                                                                                                                                                                                     |
|---------------------------------|-------------------------------------------------------------------------------------------------------------------------------------------------------------------------------------------------------------------------------------------------------------------------------------------------------------------------------------------------------------------------------------------------------------------------------------------------------------------------------------------------------------------------------------------------------------------------------------------------------------------------------------------------------------------------------------|
|                                 | <p>Informatics<br/> García-Barrío, Noelia; Hospital Universitario 12 de Octubre, Health Informatics<br/> Serrano-Balazote, Pablo; Hospital Universitario 12 de Octubre, Health Informatics<br/> Kohane, Isaac; Harvard Medical School, Department of Biomedical Informatics<br/> Characterization of COVID-19 by EHR (4CE), The Consortium for Clinical; Harvard Medical School, Department of Biomedical Informatics<br/> South , Andrew; Wake Forest University, Department of Pediatrics, Section of Nephrology<br/> Brat, Gabriel A; Harvard Medical School, Department of Biomedical Informatics<br/> Cai, T; Harvard Medical School, Department of Biomedical Informatics</p> |
| <b>Primary Subject Heading</b>: | Epidemiology                                                                                                                                                                                                                                                                                                                                                                                                                                                                                                                                                                                                                                                                        |
| Secondary Subject Heading:      | Public health, Health informatics, Infectious diseases                                                                                                                                                                                                                                                                                                                                                                                                                                                                                                                                                                                                                              |
| Keywords:                       | COVID-19, Public health < INFECTIOUS DISEASES, Epidemiology < INFECTIOUS DISEASES                                                                                                                                                                                                                                                                                                                                                                                                                                                                                                                                                                                                   |
|                                 |                                                                                                                                                                                                                                                                                                                                                                                                                                                                                                                                                                                                                                                                                     |

SCHOLARONE™  
Manuscripts



I, the Submitting Author has the right to grant and does grant on behalf of all authors of the Work (as defined in the below author licence), an exclusive licence and/or a non-exclusive licence for contributions from authors who are: i) UK Crown employees; ii) where BMJ has agreed a CC-BY licence shall apply, and/or iii) in accordance with the terms applicable for US Federal Government officers or employees acting as part of their official duties; on a worldwide, perpetual, irrevocable, royalty-free basis to BMJ Publishing Group Ltd ("BMJ") its licensees and where the relevant Journal is co-owned by BMJ to the co-owners of the Journal, to publish the Work in this journal and any other BMJ products and to exploit all rights, as set out in our [licence](#).

The Submitting Author accepts and understands that any supply made under these terms is made by BMJ to the Submitting Author unless you are acting as an employee on behalf of your employer or a postgraduate student of an affiliated institution which is paying any applicable article publishing charge ("APC") for Open Access articles. Where the Submitting Author wishes to make the Work available on an Open Access basis (and intends to pay the relevant APC), the terms of reuse of such Open Access shall be governed by a Creative Commons licence – details of these licences and which [Creative Commons](#) licence will apply to this Work are set out in our licence referred to above.

Other than as permitted in any relevant BMJ Author's Self Archiving Policies, I confirm this Work has not been accepted for publication elsewhere, is not being considered for publication elsewhere and does not duplicate material already published. I confirm all authors consent to publication of this Work and authorise the granting of this licence.

# Changes in laboratory value improvement and mortality rates over the course of the pandemic: an international retrospective cohort study of hospitalized patients infected with SARS-CoV-2

Chuan Hong PhD<sup>1\*</sup>, Harrison G Zhang<sup>1\*</sup>, Sehi L'Yi PhD<sup>1\*</sup>, Griffin M Weber MD, PhD<sup>1</sup>, Paul Avillach MD, PhD<sup>1</sup>, Bryce W.Q. Tan MBBS<sup>2</sup>, Alba Gutiérrez Sacristán PhD<sup>1</sup>, Clara-Lea Bonzel MSc<sup>1</sup>, Nathan P Palmer PhD<sup>1</sup>, Alberto Malovini PhD<sup>3</sup>, Valentina Tibollo MS<sup>3</sup>, Yuan Luo PhD<sup>4</sup>, Meghan R Hutch BS<sup>4</sup>, Molei Liu MSc<sup>5</sup>, Florence T Bourgeois<sup>6</sup>, Riccardo Bellazzi MS, PhD<sup>7</sup>, Luca Chiovato MD, PhD<sup>8</sup>, Fernando J. Sanz Vidorreta BS<sup>9</sup>, Trang T Le PhD<sup>10</sup>, Xuan Wang PhD<sup>1</sup>, William Yuan PhD<sup>1</sup>, Antoine Neuraz MD, PhD<sup>11</sup>, Vincent Benoit PhD<sup>12</sup>, Bertrand Moal MD, PhD<sup>13</sup>, Michele Morris BA<sup>14</sup>, David A Hanauer MD, MS<sup>15</sup>, Sarah Maidlow<sup>16</sup>, Kavishwar B Waghlikar MBBS, PhD<sup>17</sup>, Shawn N Murphy MD, PhD<sup>17</sup>, Hossein Estiri PhD<sup>17</sup>, Adeline Makoudjou MD<sup>18</sup>, Patric Tippmann MSc<sup>18</sup>, Jeffrey G Klann MEng, PhD<sup>17</sup>, Robert W Follett<sup>9</sup>, Nils Gehlenborg<sup>1</sup>, Gilbert S Omenn MD, PhD<sup>19</sup>, Zongqi Xia MD, PhD<sup>20</sup>, Arianna Dagliati MS, PhD<sup>7</sup>, Shyam Visweswaran MD, PhD<sup>14</sup>, Lav P Patel MS<sup>21</sup>, Danielle L Mowery PhD<sup>10</sup>, Emily R Schriver MS<sup>22</sup>, Malarkodi J Samayamuthu MD<sup>14</sup>, Ramakanth Kavuluru PhD<sup>23</sup>, Sara Lozano-Zahonero PhD<sup>18</sup>, Daniela Zoeller PhD<sup>18</sup>, Amelia LM Tan BSc, PhD<sup>1</sup>, Byorn W.L. Tan MBBS<sup>2</sup>, Kee Yuan Ngiam MBBS, MRCS, MMed, FRCS<sup>24</sup>, John H Holmes MS, PhD<sup>10,25</sup>, Petra Schubert MPH<sup>26</sup>, Kelly Cho PhD<sup>26</sup>, Yuk-Lam Ho MPH<sup>26</sup>, Brett K. Beaulieu-Jones PhD<sup>1</sup>, Miguel Pedrera-Jiménez MS<sup>27</sup>, Noelia García-Barrio MS<sup>27</sup>, Pablo Serrano-Balazote MD, MS<sup>27</sup>, Isaac S Kohane MD, PhD<sup>1</sup>, The Consortium for Clinical Characterization of COVID-19 by EHR (4CE)<sup>1</sup>, Andrew M South MD, MS<sup>28†</sup>, Gabriel A Brat MD, MPH<sup>1†</sup>, Tianxi Cai ScD<sup>1†</sup>

\*Hong, Zhang and L'Yi contributed equally

†South, Brat and Cai contributed equally

1. Department of Biomedical Informatics, Harvard Medical School, Boston, MA, USA
2. Department of Medicine, National University Hospital, Singapore
3. Laboratory of Informatics and Systems Engineering for Clinical Research, Istituti Clinici Scientifici Maugeri SpA SB IRCCS, Pavia, Italy
4. Department of Preventive Medicine, Northwestern University, Chicago, IL, USA
5. Department of Biostatistics, Harvard T.H. Chan School of Public Health, Boston, MA, USA
6. Department of Pediatrics, Harvard Medical School, Boston, MA, USA
7. Department of Electrical, Computer and Biomedical Engineering, University of Pavia, Italy
8. Unit of Internal Medicine and Endocrinology, Istituti Clinici Scientifici Maugeri SpA SB IRCCS, Pavia, Italy

- 1
  - 2
  - 3
  - 4
  - 5
  - 6
  - 7
  - 8
  - 9
  - 10
  - 11
  - 12
  - 13
  - 14
  - 15
  - 16
  - 17
  - 18
  - 19
  - 20
  - 21
  - 22
  - 23
  - 24
  - 25
  - 26
  - 27
  - 28
  - 29
  - 30
  - 31
  - 32
  - 33
  - 34
  - 35
  - 36
  - 37
  - 38
  - 39
  - 40
  - 41
  - 42
  - 43
  - 44
  - 45
  - 46
  - 47
  - 48
  - 49
  - 50
  - 51
  - 52
  - 53
  - 54
  - 55
  - 56
  - 57
  - 58
  - 59
  - 60
9. Department of Medicine, David Geffen School of Medicine at UCLA, Los Angeles, CA, USA
10. Department of Biostatistics, Epidemiology, and Informatics, University of Pennsylvania Perelman School of Medicine, Philadelphia, PA, USA
11. Department of Biomedical Informatics, Hôpital Necker-Enfants Malade, Assistance Publique Hôpitaux de Paris (APHP), University of Paris, France
12. IT department, Innovation & Data, APHP Greater Paris University Hospital, Paris, France
13. IAM unit, Bordeaux University Hospital, Bordeaux, France
14. Department of Biomedical Informatics, University of Pittsburgh, PA, USA
15. Department of Learning Health Sciences, University of Michigan Medical School, Ann Arbor, MI, USA
16. MICHR Informatics, University of Michigan, Ann Arbor, MI, USA
17. Department of Medicine, Massachusetts General Hospital, Boston, MA, USA
18. Institute of Medical Biometry and Statistics, Faculty of Medicine and Medical Center, University of Freiburg, Freiburg, Germany
19. Dept of Computational Medicine & Bioinformatics, Internal Med, Human Genetics, and Public Health University of Michigan, Ann Arbor, MI, USA
20. Department of Neurology, University of Pittsburgh, PA, USA
21. Department of Internal Medicine, Division of Medical Informatics University Of Kansas Medical Center, Kansas City, KS, USA
22. Data Analytics Center, University of Pennsylvania Health System, Philadelphia, PA, USA
23. Institute for Biomedical Informatics, University of Kentucky, Lexington, KY, USA
24. Department of Biomedical informatics, WiSDM, National University Health Systems, Singapore
25. Institute for Biomedical Informatics, University of Pennsylvania Perelman School of Medicine, Philadelphia, PA, USA
26. Massachusetts Veterans Epidemiology Research and Information Center (MAVERIC), VA Boston Healthcare System, Boston, MA, USA
27. Health Informatics, Hospital Universitario 12 de Octubre, Madrid, Spain
28. Department of Pediatrics-Section of Nephrology, Brenner Children's Hospital, Wake Forest School of Medicine, Winston Salem, NC, USA

Correspondence to: Andrew M South MD, MS, Medical Center Boulevard, Winston Salem, NC 27157. Email: [asouth@wakehealth.edu](mailto:asouth@wakehealth.edu); Gabriel A Brat MD, MPH, Department of Biomedical Informatics, Harvard Medical School, 110 Francis St., Suite 3A, Boston, MA 02215. Email: [gbrat@bidmc.harvard.edu](mailto:gbrat@bidmc.harvard.edu); and Tianxi Cai ScD, Department of Biomedical Informatics, Harvard Medical School, 10 Shattuck St., Boston, Massachusetts 02115, USA. Email: [tcai@hsph.harvard.edu](mailto:tcai@hsph.harvard.edu).

Word count: 3424

## ABSTRACT:

**OBJECTIVE:** To assess changes in international mortality rates and laboratory recovery rates during hospitalization for patients hospitalized with SARS-CoV-2 between the first wave (March 1 to June 30, 2020) and the second wave (July 1, 2020 to January 31, 2021) of the COVID-19 pandemic.

**DESIGN, SETTING, AND PARTICIPANTS:** This is a retrospective cohort study of 83,178 hospitalized patients admitted between seven days before or fourteen days after polymerase chain reaction-confirmed SARS-CoV-2 infection within the Consortium for Clinical Characterization of COVID-19 by EHR (4CE), an international multi-healthcare system collaborative of 288 hospitals in the United States (US) and Europe. The laboratory recovery rates and mortality rates over time were compared between the two waves of the pandemic.

**PRIMARY and SECONDARY OUTCOMES MEASURES:** The primary outcome was all-cause mortality rate within 28 days after hospitalization stratified by predicted low, medium, and high mortality risk at baseline. The secondary outcome was the average rate of change in laboratory values during the first week of hospitalization.

**RESULTS:** Baseline Charlson comorbidity index and laboratory values at admission were not significantly different between the first and second waves. The improvement in laboratory values over time was faster in the second wave compared to the first. The average CRP rate of change was  $-4.72$  vs.  $-4.14$  mg/dL per day ( $p=0.05$ ). The mortality rates within each risk category significantly decreased over time, with the most substantial decrease in the high-risk group (42.3% in March–April 2020 vs 30.8% in November 2020–January 2021,  $p<0.001$ ) and a moderate decrease in the intermediate-risk group (21.5% in March–April 2020 vs. 14.3% in November 2020–January 2021,  $p<0.001$ ).

1  
2  
3 **CONCLUSIONS:** Admission profiles of patients hospitalized with SARS-CoV-2 infection did  
4 not differ greatly between the first and second waves of the pandemic, but there were notable  
5 differences in laboratory improvement rates during hospitalization. Mortality risks among  
6 patients with similar risk profiles decreased over the course of the pandemic. The improvement  
7 in laboratory values and mortality risk was consistent across multiple countries.  
8  
9  
10  
11  
12

### 13 **STRENGTHS AND LIMITATIONS:**

- 14 ● Our federated approach avoided privacy concerns and regulatory barriers common in  
15 multicentre studies while facilitating timely international analyses of 83,178 patients  
16 from five countries.
- 17 ● Our common data model along with iterative quality control efforts provide assurance on  
18 harmonized data quality.
- 19 ● The current study may include patients who were either hospitalized due to COVID-19 or  
20 had a positive test for SARS-CoV-2 when admitted for an unrelated medical condition.
- 21 ● For most 4CE participating healthcare systems, we were unable to capture all out-of-  
22 hospital mortality. However, most COVID-19-related mortality among inpatients occurs  
23 in the hospital and many discharged patients have post-discharge follow-up visits, which  
24 allow us to capture 28-day mortality reasonably well.  
25  
26  
27  
28  
29  
30  
31  
32  
33  
34  
35

### 36 **INTRODUCTION**

37  
38  
39 Mortality rates among hospitalized patients with SARS-CoV-2 infection have decreased over the  
40 course of the COVID-19 pandemic [1–5]. It has been hypothesized that this may reflect a higher  
41 proportion of younger patients being hospitalized later in the pandemic, but a recently published  
42 study reported significant decreases in mortality after stratification by age group [6,7]. A variety  
43 of factors are likely responsible, including, but not limited to, improvements in clinical  
44 management, resource allocation, and earlier detection of disease [8–15]. There is limited  
45 evidence to shed light on these hypotheses; few studies have examined improvements of in-  
46 hospital recovery and outcomes over the course of the pandemic. In this international multi-  
47 healthcare system retrospective cohort study, we leveraged electronic health records (EHR) data  
48 from hospitalized COVID-19 patients[16] to examine temporal shifts in (1) the rate of change for  
49  
50  
51  
52  
53  
54  
55  
56  
57  
58  
59  
60



laboratory values towards normal during hospitalization and (2) mortality rates stratified by baseline mortality risk.

## METHODS

---

Individual-level EHR data on hospitalized COVID-19 patients from 18 healthcare systems of the 4CE consortium [17-18] were extracted and harmonized for this study. Supplementary Table 1 reports further metadata on the participating healthcare systems, which represent 288 hospitals across five countries: France, Germany, Italy, Spain, and the US. Each healthcare system ran the analyses locally and reported summary results to the central institution for federated analyses. Institutional review board approval was obtained at each healthcare system. This study followed the Strengthening the Reporting of Observational Studies in Epidemiology (STROBE) reporting guidelines [19].

### Cohort Identification and Data Collection

Our study included 83,178 patients admitted 7 days before to 14 days after the date of their first positive reverse transcription-polymerase chain reaction SARS-CoV-2 test result recorded in their EHR. We included patients admitted between March 1, 2020 and January 31, 2021 with follow-up data up to June 2021.

We obtained patient-level data on demographics including age groups (18-25, 26-49, 50-69, 70-80, 80+), sex, and race; laboratory test values during hospitalization; International Classification of Disease (ICD) codes, date of discharge, and mortality information. Only US sites reported race. We calculated the Charlson comorbidity index (CCI) based on ICD codes [20–22]. We focused on ten laboratory tests: C-reactive protein (CRP), albumin, alanine aminotransferase (ALT), aspartate aminotransferase (AST), total bilirubin, creatinine, D-dimer, white blood cell count, lymphocyte count, and neutrophil count [10,23–27]. A schematic of our workflow is presented in eFigure 1.

### Primary and Secondary Outcomes

1  
2  
3 We defined all-cause mortality up to 28 days after the admission date as the primary outcome  
4 and excluded patients who died on the day of admission in the survival analysis. Each 4CE  
5 healthcare system used local criteria to identify in-hospital mortality. We defined laboratory test  
6 values during hospitalization as secondary outcomes.  
7  
8  
9

### 10 Statistical Analysis

11  
12  
13  
14 To assess temporal changes over the course of the pandemic, we performed stratified analyses by  
15 every two calendar months and between two waves of the pandemic, wherein we defined the first  
16 wave as from March 1 to June 30, 2020 and the second wave as from July 1, 2020 to January 31,  
17 2021.  
18  
19

20  
21 We summarized demographic characteristics, the average CCI at admission, hospitalization  
22 duration, and absolute mortality risk over time. Since the VA population has a distinct  
23 demographic composition, we reported demographic summaries excluding the VA. We further  
24 compared the distributions of admission laboratory values between the two waves.  
25  
26  
27  
28  
29

30  
31 To summarize the laboratory trajectories during hospitalization, we fit log-linear mixed effects  
32 models to the longitudinal laboratory data with cubic splines for time since admission, where we  
33 used three knots at days 3, 7, and 17 in the fixed effects to capture nonlinear trends. Since  
34 laboratory trajectories may vary by how quickly patients recover, we stratified the trajectory  
35 analysis by the hospitalization duration  $\leq 1$  week, 1-2 weeks, and 2+ weeks. For each laboratory  
36 test, we summarized the *average daily rate of change during the first week of hospitalization* in  
37 the first and second waves, denoted by  $R_1$  and  $R_2$ . The laboratory trajectory analyses only  
38 included data from the US, France, and Spain since few patients from the Germany and Italy  
39 sites had repeated laboratory tests.  
40  
41  
42  
43  
44  
45  
46

47  
48 To study temporal changes in mortality risks, we fit LASSO penalized Cox proportional hazard  
49 models for mortality using baseline covariates adjusted for calendar time of the admission date  
50 [28-29]. We considered three sets of covariates: (1) age, sex, and race; (2) the ten laboratory  
51 tests; and (3) CCI. We modeled the calendar time effect using a cubic spline with knots every 2  
52 weeks. We performed a  $\log_e$ -transformation to D-dimer, CRP, and ALT due to the skewness in  
53  
54  
55  
56  
57  
58  
59  
60

1  
2  
3 their distributions. Due to the high correlation between ALT and AST, we include AST to ALT  
4 ratio (AST/ALT) and  $\log_e$ ALT as measures of liver function [30-31] instead of  $\log_e$ AST and  
5  $\log_e$ ALT. We imputed missing baseline laboratory measures and CCI via the multivariate  
6 imputation by chained equation method and averaged over five imputed sets [32]. The mortality  
7 analyses excluded Italy since a very small number of deaths were reported after April 2020 in the  
8 participating healthcare systems.  
9

10  
11  
12  
13  
14  
15 Using the trained penalized Cox model, we obtained a mortality risk score for each patient  
16 constructed using their baseline covariates. The candidate covariates included in the model  
17 training were determined according to existing clinical knowledge. We calculated the area under  
18 the receiver operating characteristic curve (AUC) of the risk score for predicting 28-day  
19 mortality [33]. We classified patients into three mortality risk groups according to their risk  
20 score: high risk if score > chigh, medium risk if score  $\in$  (clow, chigh), and low risk if score  $\leq$   
21 clow. We chose clow and chigh to attain a sensitivity of 85% (clow) and a specificity of 85%  
22 (chigh) for predicting 28-day mortality, which ensures a good separation between the low-risk  
23 and high-risk categories. Stratifying by the calendar time window of the admission date, we  
24 calculated the AUC of the risk model, the proportions of patients belonging to each risk  
25 category, and their corresponding mortality risks. The accuracy parameters were estimated via  
26 ten-fold cross-validation to correct for overfitting [34]. We used bootstrap to estimate standard  
27 errors [35].  
28  
29  
30  
31  
32  
33  
34  
35  
36  
37

38  
39 Patient-level analyses were performed within each 4CE healthcare system to obtain site-specific  
40 results. We integrate results from all sites using fixed effects meta-analysis. Since the number of  
41 hospitalized patients had a different temporal trend across healthcare systems and across  
42 countries, we assigned the same weight across different calendar months for each healthcare  
43 system to facilitate effective comparisons between waves. All statistical analyses were performed  
44 using R software version 4.0.2.  
45  
46  
47  
48  
49

## 50 **RESULTS**

### 51 Characteristics of the Study Cohort

---

1  
2  
3 The majority of patients were hospitalized March–April 2020 and November 2020 to January  
4 2021 (Figure 1). The most prevalent age group at any time was ages 50–69. In the US—  
5 excluding VA patients which are summarized in eFigure 2—the prevalence of patients who were  
6 White increased (49.1% in March–April 2020 to 64.1% in November 2020–January 2021,  
7  $p<0.001$ ), while the prevalence of patients who were Black decreased (30.0% in March–April  
8 2020 to 17.4% in November 2020–January 2021,  $p<0.001$ ). The average CCI at admission  
9 remained relatively constant across time. The absolute 28-day mortality risk decreased from  
10 20.7% in March–April 2020 to 11.9% in July–August 2020 ( $p<0.001$ ), then increased slightly to  
11 12.4% in November 2020–January 2021 ( $p<0.001$ ). The temporal shifts in the number of  
12 hospitalized patients, demographics, CCI, and mortality rate were generally consistent across  
13 countries (eFigure 2).  
14  
15  
16  
17  
18  
19  
20  
21  
22  
23

24 As shown in Figure 2, observed CRP, creatinine, and D-dimer values at admission were lower in  
25 the first wave compared to the second but these differences were not statistically significant. The  
26 between-wave CRP mean difference was higher for France (18.5 mg/dL; 95% CI, 16.5–20.5) and  
27 Spain (8.4 mg/dL; 95% CI, 4.8–12.0) compared to the US (7.5 mg/dL; 95% CI, 6.1–8.8) and  
28 Germany (6.7 mg/dL; 95% CI, –2.5–16.1) (eFigure 3).  
29  
30  
31  
32  
33

#### 34 Change in Laboratory Trajectory During Hospitalization

35 Patients' laboratory trajectories during hospitalization improved faster in the second wave  
36 compared to the first (Figure 3). CRP values decreased more rapidly ( $R_1 = -4.14$  vs.  $R_2 = -4.72$   
37 mg/dL per day,  $p=0.05$ ), while D-dimer values increased substantially faster during the first  
38 wave but remained relatively stagnant during the second ( $R_1 = 21.01$  vs.  $R_2 = 1.25$  ng/dL per day,  
39  $p<0.001$ ).  
40  
41  
42  
43  
44  
45

46 Hospitalization duration decreased, with 53.4% of patients discharged within 1 week in the  
47 second wave compared to 49.2% in the first ( $p<0.001$ ). Patients hospitalized for longer generally  
48 had worse laboratory profiles compared to those with shorter stays. The average day-3 CRP  
49 among those hospitalized for  $\leq 1$  week and 2+ weeks was 41.68 and 63.64 mg/dL ( $p<0.001$ )  
50 during the first wave and 27.33 and 43.52 mg/dL ( $p<0.001$ ) during the second wave. The  
51 between-wave difference in the rate of decline,  $\Delta_R = R_1 - R_2$ , also varied by the duration of  
52  
53  
54  
55  
56  
57  
58  
59  
60

1  
2  
3 hospitalization. For CRP,  $\Delta_R$  was 1.01 ( $p<0.001$ ), 2.04 ( $p<0.001$ ) and 0.95 ( $p=0.001$ ) mg/dL per  
4 day among those hospitalized for  $\leq 1$ , 1-2, and 2+ weeks, respectively. For creatinine and D-  
5 dimer,  $\Delta_R$  had similar patterns but were not statistically significant.  
6  
7  
8  
9

10 Improvement in laboratory values was more pronounced in the US than in France and Spain  
11 (eFigure 4). For CRP,  $\Delta_R = 1.07$  mg/dL per day (95% CI, 0.86-1.28) in the US, which is  
12 significantly higher than that of France ( $-0.69$  mg/dL per day, 95% CI,  $-1.08$ - 2.92), and Spain  
13 ( $-0.3$  mg/dL per day, 95%CI, $-0.79$ -0.19). The reduction in hospitalization duration varied  
14 greatly between countries. The proportion of patients discharged within 1 week increased in the  
15 second wave compared to the first in the US (53.4% vs 61.1%,  $p<0.001$ ), Italy (2.5% vs 14.9%,  
16  $p<0.001$ ), Germany (32.7% vs 48.6%,  $p<0.001$ ), and Spain (57.1% vs 62.3%,  $p<0.001$ ), but  
17 decreased in France (46.1% vs 42.4%,  $p<0.001$ ).  
18  
19  
20  
21  
22  
23  
24  
25

### 26 Temporal Changes in Mortality Risk

27 In our survival analysis, the variables significantly associated with increased risk of mortality  
28 were older age, male sex, CCI, lower albumin and lymphocyte count, and higher CRP, total  
29 bilirubin, white blood cell count, neutrophil count, D-dimer, ALT, and AST/ALT at baseline  
30 (Figure 4). The hazard ratios of these risk factors were concordant between countries (eFigure  
31 5).  
32  
33  
34  
35  
36  
37

38 Over the course of the pandemic, the models' predictive capabilities did not significantly change  
39 with AUC ranging from 0.752 to 0.787; the temporal patterns were similar across countries  
40 (eFigure 6).  
41  
42  
43  
44

45 The proportion of high-risk patients decreased from March-April 2020 to July-August 2020 but  
46 gradually increased from September 2020 to January 2021 (Figure 5). However, the mortality  
47 rates within each risk category decreased over calendar time, with the decrease from March-  
48 April 2020 to November 2020-January 2021 most substantial in the high-risk category (47.1%  
49 vs. 30.8%,  $p<0.001$ ), moderate in the intermediate-risk (25.6% vs. 14.8%,  $p<0.001$ ), and the  
50 low-risk (9.5% vs 4.7%,  $p<0.001$ ) categories. From March-April 2020 to November 2020-  
51 January 2021, the US had a more consistent decrease over time while France and Spain  
52  
53  
54  
55  
56  
57  
58  
59  
60

1  
2  
3 decreased from March–April 2020 to July–August 2020 but plateaued afterwards (eFigure 7). In  
4 the high-risk category, the decrease in mortality risk from March–April 2020 to July–August  
5 2020 was the highest in Spain (42.7% vs 25.0%,  $p=0.002$ ), followed by the US (50.0% vs 38.4%,  
6  $p<0.001$ ), and France (40.1% vs. 31.7%,  $p=0.11$ ). By November 2020–January 2021, the  
7 mortality risk further decreased to 29.5% (95% CI, 28.3-30.7) in the US, but slightly increased to  
8 34.9% (95% CI, 31.7-38.0) in France and 28.6% (95% CI, 22.9-34.3) in Spain.  
9  
10  
11  
12  
13  
14

## 15 DISCUSSION

---

18 In this large, international, multi-healthcare system retrospective cohort study, we found  
19 decreasing mortality rates and faster physiological recovery based on laboratory profiles between  
20 the first and second wave of the COVID-19 pandemic. Given the minimal changes in patient  
21 demographic and clinical profiles at admission between the two waves, our findings cannot be  
22 entirely explained by a less severely ill cohort of patients admitted in the second wave [7,36–38].  
23 There were no new major effective pharmacologic therapies introduced between the two  
24 waves[39–48]. However, some existing therapies, such as corticosteroids, achieved widespread  
25 use as health care providers gained experience with managing the disease. Moreover, evolving  
26 protocols for hospital care, including adapted ventilatory support and the higher proportion of  
27 patients managed without mechanical ventilation, probably contributed to improving streamlined  
28 care and resource allocation. Potential explanations for the differences between the two waves  
29 include timing for emergency visits and hospital admissions, iterative improvement in  
30 management strategies of the severe cases, and increased preparedness of healthcare systems in  
31 the latter stages of the pandemic. As diverse healthcare systems and populations in different  
32 countries learned to improve the care of patients with COVID-19 through diverse experiences,  
33 knowledge rapidly disseminated. For example, hospitals may have benefited from improved  
34 resource allocation strategies and management in smaller surges in hospitalizations[49].  
35 Negative trial data for hydroxychloroquine, azithromycin, and other pharmacologic agents may  
36 have led to reduced usage of these drugs and reduced drug-related adverse effects over the  
37 course of the pandemic [41,50–53]. Further investigations into the potential explanations are  
38 warranted as this study was not designed to infer the specific reasons for this improvement.  
39  
40  
41  
42  
43  
44  
45  
46  
47  
48  
49  
50  
51  
52  
53  
54  
55  
56  
57  
58  
59  
60

1  
2  
3 Overall, we observed greater improvements in positive and negative acute phase reactants and  
4 markers of organ function (e.g., creatinine, ALT, and AST) in the second wave compared to the  
5 first, which suggests that systemic inflammation and multiorgan dysfunction all improved faster  
6 in the second wave. Interestingly, we observed greater improvements in CRP, ALT, AST, and  
7 creatinine in the second wave in patients with longer hospitalizations; while this may be  
8 reflective of a sicker patient population, this could be due to time-dependent (i.e., survivor) bias  
9 [54]. Alternatively, there may have been increased corticosteroid use in patients with severe  
10 COVID-19 in the second wave following preliminary results of the RECOVERY trial, which  
11 may have improved inflammatory markers and mortality [14,55,56]. In addition, there may have  
12 been increased remdesivir in combination with dexamethasone between the first and second  
13 waves that may confound these associations [13,55]. Further studies are warranted to investigate  
14 the alteration of biochemical trajectories of dexamethasone with remdesivir in contrast to  
15 dexamethasone or remdesivir monotherapy [57]. It is also unclear why we observed between-  
16 country differences in the between-wave CRP trajectories, whereupon Spain and France had  
17 blunted improvement rates; this could certainly be due to differential clinical management across  
18 countries.

19  
20  
21  
22  
23  
24  
25  
26  
27  
28  
29  
30  
31  
32 One potential explanation for the blunted D-dimer trajectories in the second wave compared to  
33 the first is increased prophylactic anticoagulation use after the release of International Society on  
34 Thrombosis and Haemostasis guidelines in May and September 2020, which recommended  
35 prophylactic anticoagulation with low-molecular-weight heparin in all hospitalized patients with  
36 COVID-19 who had no anticoagulation contraindications [58]. This may have reduced the higher  
37 incidence of thrombotic events observed in the first wave, which could be associated with high  
38 D-dimer levels. Furthermore, as D-dimer is often correlated with disease severity and systemic  
39 inflammation, increased glucocorticoid use in patients with severe disease could blunt increases  
40 in D-dimer [50,59–61].

41  
42  
43  
44  
45  
46  
47  
48  
49  
50 Our study suggests that older age, male sex, higher CCI, low albumin and lymphocyte count  
51 values, and higher CRP, total bilirubin, white blood cell count, neutrophil count, D-dimer, ALT,  
52 and AST/ALT were significantly associated with higher mortality risk. While male sex, older  
53 age, and existing comorbidities are established major risk factors for COVID-19-related  
54  
55  
56  
57  
58  
59  
60



1  
2  
3 mortality, our observations of the associations between higher AST/ALT, ALT, and bilirubin  
4 with mortality [51,52,62,63] are unique. While derangements in liver function tests are well  
5 described in prior studies of patients with COVID-19, the patterns of liver dysfunction associated  
6 with worse outcomes have been inconsistent [53,64]. Furthermore, these prior observations  
7 tended to be derived from single-center studies which likely introduce significant sources of bias.  
8 In particular, our observation of a combination of elevated markers of cholestatic liver function  
9 (bilirubin, AST/ALT ratio), inflammatory markers, and cell counts suggests that cholestatic liver  
10 dysfunction may be involved in the disease course, as is observed in patients who are critically ill  
11 [65–67]. Furthermore, emerging, though limited, COVID-19 post-mortem studies have  
12 suggested that SARS-CoV-2 may directly infect hepatocytes and lead to altered bile duct  
13 morphology, reinforcing the possible role of viral-induced cholestatic hepatitis in severe  
14 COVID-19 [67]. Alternatively, medication-related liver injury could certainly contribute to liver  
15 dysfunction. Future investigations utilizing patient-level data validated by thorough chart review  
16 is warranted to better define these associations.  
17  
18  
19  
20  
21  
22  
23  
24  
25  
26  
27  
28

29 Although cross-country and cross-healthcare-system heterogeneities exist in demographics and  
30 laboratory distributions, we observed concordant improvement patterns in both laboratory  
31 recovery during hospitalization and mortality risk over time across different countries. However,  
32 the admission profile-adjusted temporal change in mortality risk over calendar months differed  
33 slightly between the US and Europe (Spain and France). In addition to an increase in  
34 hospitalization duration in the latter half of the pandemic in France, in Spain and France the  
35 mortality risk plateaued overall and actually increased in the high-risk group. Further  
36 investigation into these between-country differences in mortality using chart review and other  
37 validation steps is warranted.  
38  
39  
40  
41  
42  
43  
44  
45

### 46 Limitations

47 This study has several limitations. First, similar to other EHR-based studies, the current study  
48 might have included patients with incidental hospitalization (i.e., a positive test for SARS-CoV-2  
49 when admitted for an unrelated medical condition) [68]. Further, information regarding each  
50 patient's in-hospital care settings, such as admission to intensive care units and their specific  
51 respiratory status was not available. Second, most 4CE participating healthcare systems were  
52  
53  
54  
55  
56  
57  
58  
59  
60



1  
2  
3 unable to capture all out-of-hospital mortality. However, most COVID-19-related mortality  
4 occurs in the hospital, and most discharged patients would have post-discharge follow-up visits,  
5 which would reasonably capture 28-day mortality. A further limitation was the lack of data on  
6 patient-specific timing of symptom onset relative to hospital course. Additionally, our study may  
7 have potential time-dependent bias given that 4CE defines a first hospital admission that occurs  
8 between 7 days before and up to 14 days after the first positive SARS-CoV-2 PCR test. This may  
9 also affect the results stratified by duration of hospitalization. Future analyses accounting for  
10 medication administration and procedure use and the subsequent effect on inflammatory markers  
11 and creatinine are necessary to infer why these outcomes improved in the second wave.  
12  
13  
14  
15  
16  
17  
18  
19  
20  
21  
22  
23

## 24 **CONCLUSION**

25 Patients' admission profiles did not differ substantially between waves of the COVID-19  
26 pandemic, but there were notable differences in laboratory recovery rates and mortality in the  
27 second wave compared to the first.  
28  
29  
30  
31

---

## 32 **ETHICS STATEMENT**

33  
34  
35  
36 All study sites were responsible for and obtained ethics approval, as needed, from the appropriate  
37 ethics committee at their institution. IRB protocols were reviewed and approved at APHP  
38 (IRB00011591, Project CSE-20-29\_ClinicalCOVID), Bordeaux University Hospital  
39 (Registration #CHUBX2020RE0253), ICSM (Protocol #2518 CE), Mass General Brigham  
40 (IRB#2020P001483), Northwestern University (IRB# STU00212845), University of Kansas  
41 (STUDY00146505), University of Freiburg (Application #255/20, Process #210587), and at VA  
42 North Atlantic, Southwest, Midwest, Continental, and Pacific (IRB # 3310-x).  
43  
44  
45  
46  
47  
48  
49

50 The research was determined to be exempt at Hospital Universitario 12 de Octubre (Protocol  
51 #20/403), University of Michigan (IRB# HUM00184357), Beth Israel Deaconess Medical Center  
52 (IRB# 2020P000565), University of Pittsburgh (STUDY20070095), and University of  
53 Pennsylvania (IRB#842813). University of California Los Angeles determined that this study  
54  
55  
56  
57  
58  
59  
60

1  
2  
3 does not need IRB approval because research using limited data sets does not constitute human  
4 subjects research.  
5  
6  
7

8 The lead author affirms that the manuscript is an honest, accurate, and transparent account of the  
9 study being reported; that no important aspects of the study have been omitted; and that any  
10 discrepancies from the study as originally planned have been explained.  
11  
12  
13

### 14 15 **AUTHOR CONTRIBUTIONS**

16 GMW, PA, AGS, NPP, RB, SNM, IK, GAB, and TC contributed to design and conceptualization  
17 of the study. GMW, NPP, AM, VT, YL, MRH, RB, LC, FJSV, VB, BM, MM, DAH, SM, KBW,  
18 SNM, HE, AM, PT, JGK, RWF, GSO, ZX, SV, LPP, DLM, ERS, MJS, SLZ, DZ, ALMT,  
19 BWLT, KYN, PS, KC, YLH, MPJ, NGB, and PSB contributed to data collection. CH, HZ, SL,  
20 GMW, PA, BWQT, AGS, CLB, YL, ML, FTB, TTL, XW, WY, AN, VB, BM, MM, DAH, MA,  
21 PT, JGK, NG, AD, LPP, RK, DZ, JHH, BKBJ, IK, AMS, GAB, and TC contributed to data  
22 analysis and interpretation. All authors contributed to drafting and revision of the manuscript and  
23 approved the final manuscript. All authors are accountable for all aspects of the work in ensuring  
24 that questions related to the accuracy or integrity of any part of the work are appropriately  
25 investigated and resolved.  
26  
27  
28  
29  
30  
31  
32  
33  
34  
35

### 36 **FUNDING STATEMENT**

37 GMW is supported by NIH/NCATS UL1TR002541, NIH/NCATS UL1TR000005, NIH/NLM  
38 R01LM013345, and NIH/NHGRI 3U01HG008685-05S2. BWQT is supported by the National  
39 Medical Research Council Research Training Fellowship (MOH-000195-00). FJSV is supported  
40 by NIH/NCATS UL1TR001881. DAH is supported by NIH/NCATS UL1TR002240. KBW is  
41 supported by NIH/NHLBI R01 HL151643-01. SNM is supported by NIH/NCATS  
42 5UL1TR001857-05 and NIH/NHGRI 5R01HG009174-04. NG is supported by NIH/NLM T15  
43 LM007092. GSO is supported by NIH P30ES017885 and U24CA210967. ZX is supported by  
44 NIH/NINDS R01NS098023. SV is supported by NIH/NLM R01LM012095 and NIH/NCATS  
45 UL1TR001857. LPP is supported by NIH/NCATS CTSA Award #UL1TR002366. DLM is  
46 supported by NIH/NCATS CTSA Award #UL1-TR001878. RK is supported by NIH/NCATS  
47 CTSA award#UL1TR001998. NGB is supported by the Carlos III Health Institute PI18/00981.  
48  
49  
50  
51  
52  
53  
54  
55  
56  
57  
58  
59  
60

1  
2  
3 AMS is supported by NIH/NHLBI K23HL148394 and L40HL148910 and NIH/NCATS  
4 UL1TR001420.  
5  
6  
7

## 8 **COMPETING INTEREST STATEMENT**

9

10  
11 There are no competing interests to report.  
12  
13  
14  
15

### 16 Patient and Public Involvement

17

18  
19 Patients and the public were not involved in the design, conduct, or reporting, or dissemination  
20 plans of the research.  
21  
22  
23  
24

### 25 FIGURES and TABLES

26

27 Figure 1: Demographic shifts. For demographics variables, we set male sex, age 50-69, and  
28 White race as reference groups.  
29

30 Figure 2: Distribution of laboratory values at admission.  
31

32 Figure 3: Patient-level laboratory recovery rate.  
33

34 Figure 4. Hazard ratio of the Cox model for mortality risk prediction (excluding Italy).  
35

36 Figure 5. Risk model results w/event rate information and risk stratification.  
37  
38  
39  
40  
41  
42  
43  
44  
45  
46  
47  
48  
49  
50  
51  
52  
53  
54  
55  
56  
57  
58  
59  
60

## REFERENCES

- 1 Horwitz LI, Jones SA, Cerfolio RJ, *et al.* Trends in COVID-19 Risk-Adjusted Mortality Rates. *J Hosp Med* 2021;**16**:90–2.
- 2 Dennis JM, McGovern AP, Vollmer SJ, *et al.* Improving Survival of Critical Care Patients With Coronavirus Disease 2019 in England: A National Cohort Study, March to June 2020. *Crit Care Med* 2021;**49**:209–14.
- 3 Asch DA, Sheils NE, Islam MN, *et al.* Variation in US Hospital Mortality Rates for Patients Admitted With COVID-19 During the First 6 Months of the Pandemic. *JAMA Intern Med* 2021;**181**:471–8.
- 4 Xu H, Garcia-Ptacek S, Annetorp M, *et al.* Decreased Mortality Over Time During the First Wave in Patients With COVID-19 in Geriatric Care: Data From the Stockholm GeroCovid Study. *J Am Med Dir Assoc* 2021;**22**:1565–73.e4.
- 5 Radovanovic D, Pini S, Franceschi E, *et al.* Characteristics and outcomes in hospitalized COVID-19 patients during the first 28 days of the spring and autumn pandemic waves in Milan: An observational prospective study. *Respir Med* 2021;**178**:106323.
- 6 Rossen LM, Branum AM, Ahmad FB, *et al.* Excess Deaths Associated with COVID-19, by Age and Race and Ethnicity - United States, January 26-October 3, 2020. *MMWR Morb Mortal Wkly Rep* 2020;**69**:1522–7.
- 7 Finelli L, Gupta V, Petigara T, *et al.* Mortality Among US Patients Hospitalized With SARS-CoV-2 Infection in 2020. *JAMA Netw Open* 2021;**4**:e216556.
- 8 Sun Q, Qiu H, Huang M, *et al.* Lower mortality of COVID-19 by early recognition and intervention: experience from Jiangsu Province. *Ann Intensive Care* 2020;**10**:33.
- 9 Wang D, Hu B, Hu C, *et al.* Clinical Characteristics of 138 Hospitalized Patients With 2019 Novel Coronavirus-Infected Pneumonia in Wuhan, China. *JAMA* 2020;**323**:1061–9.
- 10 Huang C, Wang Y, Li X, *et al.* Clinical features of patients infected with 2019 novel coronavirus in Wuhan, China. *The Lancet*. 2020;**395**:497–506. doi:10.1016/s0140-6736(20)30183-5
- 11 Goyal DK, Mansab F, Iqbal A, *et al.* Early intervention likely improves mortality in COVID-19 infection. *Clin Med* Published Online First: 1 May 2020. doi:10.7861/clinmed.2020-0214
- 12 Mittermaier M, Pickerodt P, Kurth F, *et al.* Evaluation of PEEP and prone positioning in early COVID-19 ARDS. *EClinicalMedicine* 2020;**28**:100579.
- 13 Beigel JH, Tomashek KM, Dodd LE, *et al.* Remdesivir for the Treatment of Covid-19 - Final Report. *N Engl J Med* 2020;**383**:1813–26.

- 14 WHO Rapid Evidence Appraisal for COVID-19 Therapies (REACT) Working Group, Sterne JAC, Murthy S, *et al.* Association Between Administration of Systemic Corticosteroids and Mortality Among Critically Ill Patients With COVID-19: A Meta-analysis. *JAMA* 2020;**324**:1330–41.
- 15 Saito S, Asai Y, Matsunaga N, *et al.* First and second COVID-19 waves in Japan: A comparison of disease severity and characteristics. *J. Infect.* 2021;**82**:84–123.
- 16 Le TT, Gutiérrez-Sacristán A, Son J, *et al.* Multinational characterization of neurological phenotypes in patients hospitalized with COVID-19. *Sci Rep* 2021;**11**:20238.
- 17 Brat GA, Weber GM, Gehlenborg N, *et al.* International electronic health record-derived COVID-19 clinical course profiles: the 4CE consortium. *NPJ Digit Med* 2020;**3**:109.
- [dataset] 18 Brat GA, Weber GM, Gehlenborg N, *et al.* Data from: International electronic health record-derived COVID-19 clinical course profiles: the 4CE consortium.  
[www.covidclinical.net](http://www.covidclinical.net)
- 19 von Elm E, Altman DG, Egger M, *et al.* The Strengthening the Reporting of Observational Studies in Epidemiology (STROBE) statement: guidelines for reporting observational studies. *Lancet* 2007;**370**:1453–7.
- 20 Deyo R. Adapting a clinical comorbidity index for use with ICD-9-CM administrative databases. *Journal of Clinical Epidemiology.* 1992;**45**:613–9. doi:10.1016/0895-4356(92)90133-8
- 21 Quan H, Sundararajan V, Halfon P, *et al.* Coding algorithms for defining comorbidities in ICD-9-CM and ICD-10 administrative data. *Med Care* 2005;**43**:1130–9.
- 22 Ladha KS, Zhao K, Quraishi SA, *et al.* The Deyo-Charlson and Elixhauser-van Walraven Comorbidity Indices as predictors of mortality in critically ill patients. *BMJ Open* 2015;**5**:e008990.
- 23 Ghahramani S, Tabrizi R, Lankarani KB, *et al.* Laboratory features of severe vs. non-severe COVID-19 patients in Asian populations: a systematic review and meta-analysis. *Eur J Med Res* 2020;**25**:30.
- 24 Huang I, Pranata R, Lim MA, *et al.* C-reactive protein, procalcitonin, D-dimer, and ferritin in severe coronavirus disease-2019: a meta-analysis. *Ther Adv Respir Dis* 2020;**14**:1753466620937175.
- 25 Smilowitz NR, Kunichoff D, Garshick M, *et al.* C-reactive protein and clinical outcomes in patients with COVID-19. *Eur Heart J* 2021;**42**:2270–9.
- 26 Shi S, Nie B, Chen X, *et al.* Clinical and laboratory characteristics of severe and non-severe patients with COVID-19: A retrospective cohort study in China. *J Clin Lab Anal* 2021;**35**:e23692.

- 1  
2  
3 27 Wang F, Hou H, Wang T, *et al.* Establishing a model for predicting the outcome of COVID-  
4 19 based on combination of laboratory tests. *Travel Med Infect Dis* 2020;**36**:101782.  
5  
6  
7 28 Simon N, Friedman J, Hastie T, *et al.* Regularization Paths for Cox's Proportional Hazards  
8 Model via Coordinate Descent. *Journal of Statistical Software*. 2011;**39**.  
9 doi:10.18637/jss.v039.i05  
10  
11 29 Tibshirani R. The lasso method for variable selection in the Cox model. *Stat Med*  
12 1997;**16**:385–95.  
13  
14 30 Williams AL, Hoofnagle JH. Ratio of serum aspartate to alanine aminotransferase in  
15 chronic hepatitis. Relationship to cirrhosis. *Gastroenterology* 1988;**95**:734–9.  
16  
17 31 Hall P, Cash J. What is the real function of the liver 'function' tests? *Ulster Med J*  
18 2012;**81**:30–6.  
19  
20 32 van Buuren S, Groothuis-Oudshoorn K. mice: Multivariate Imputation by Chained  
21 Equations in R. *J Stat Softw* 2011;**45**. doi:10.18637/jss.v045.i03  
22  
23 33 Uno H, Cai T, Tian L, *et al.* Evaluating Prediction Rules for t-Year Survivors With  
24 Censored Regression Models. *J Am Stat Assoc* 2007;**102**:527–37.  
25  
26 34 Stone M. Cross-validated choice and assessment of statistical predictions. *J R Stat Soc*  
27 1974;**36**:111–33.  
28  
29 35 Efron B, Tibshirani RJ. *An Introduction to the Bootstrap*. CRC Press 1994.  
30  
31 36 Docherty AB, Mulholland RH, Lone NI, *et al.* Changes in in-hospital mortality in the first  
32 wave of COVID-19: a multicentre prospective observational cohort study using the WHO  
33 Clinical Characterisation Protocol UK. *Lancet Respir Med* Published Online First: 14 May  
34 2021. doi:10.1016/S2213-2600(21)00175-2  
35  
36 37 Doidge JC, Gould DW, Ferrando-Vivas P, *et al.* Trends in Intensive Care for Patients with  
37 COVID-19 in England, Wales, and Northern Ireland. *Am J Respir Crit Care Med*  
38 2021;**203**:565–74.  
39  
40 38 Vahidy FS, Drews AL, Masud FN, *et al.* Characteristics and Outcomes of COVID-19  
41 Patients During Initial Peak and Resurgence in the Houston Metropolitan Area. *JAMA*  
42 2020;**324**:998–1000.  
43  
44 39 WHO Solidarity trial consortium, Pan H, Peto R, *et al.* Repurposed antiviral drugs for  
45 COVID-19 –interim WHO SOLIDARITY trial results. bioRxiv. 2020.  
46 doi:10.1101/2020.10.15.20209817  
47  
48 40 Sanders JM, Monogue ML, Jodlowski TZ, *et al.* Pharmacologic Treatments for Coronavirus  
49 Disease 2019 (COVID-19): A Review. *JAMA* 2020;**323**:1824–36.  
50  
51 41 Sheahan TP, Sims AC, Leist SR, *et al.* Comparative therapeutic efficacy of remdesivir and  
52  
53  
54  
55  
56  
57  
58  
59  
60



- 1  
2  
3 combination lopinavir, ritonavir, and interferon beta against MERS-CoV. *Nat Commun*  
4 2020;**11**:222.  
5  
6  
7 42 Gautret P, Lagier J-C, Parola P, *et al.* Hydroxychloroquine and azithromycin as a treatment  
8 of COVID-19: results of an open-label non-randomized clinical trial. *Int J Antimicrob*  
9 *Agents* 2020;**56**:105949.  
10  
11 43 Spinner CD, Gottlieb RL, Criner GJ, *et al.* Effect of Remdesivir vs Standard Care on  
12 Clinical Status at 11 Days in Patients With Moderate COVID-19: A Randomized Clinical  
13 Trial. *JAMA* 2020;**324**:1048–57.  
14  
15 44 Wang Y, Zhang D, Du G, *et al.* Remdesivir in adults with severe COVID-19: a randomised,  
16 double-blind, placebo-controlled, multicentre trial. *Lancet* 2020;**395**:1569–78.  
17  
18 45 Boulware DR, Pullen MF, Bangdiwala AS, *et al.* A Randomized Trial of  
19 Hydroxychloroquine as Postexposure Prophylaxis for Covid-19. *N Engl J Med*  
20 2020;**383**:517–25.  
21  
22  
23 46 Mitjà O, Corbacho-Monné M, Ubals M, *et al.* A Cluster-Randomized Trial of  
24 Hydroxychloroquine for Prevention of Covid-19. *N Engl J Med* 2021;**384**:417–27.  
25  
26 47 Self WH, Semler MW, Leither LM, *et al.* Effect of Hydroxychloroquine on Clinical Status  
27 at 14 Days in Hospitalized Patients With COVID-19: A Randomized Clinical Trial. *JAMA*  
28 2020;**324**:2165–76.  
29  
30  
31 48 WHO Solidarity Trial Consortium, Pan H, Peto R, *et al.* Repurposed Antiviral Drugs for  
32 Covid-19 - Interim WHO Solidarity Trial Results. *N Engl J Med* 2021;**384**:497–511.  
33  
34 49 Weber GM, Zhang HG, L'Yi S, *et al.* International changes in COVID-19 clinical  
35 trajectories across 315 hospitals and 6 countries: A 4CE consortium study (preprint). *JMIR*  
36 *Preprints*. 2021. doi:10.2196/preprints.31400  
37  
38  
39 50 Poissy J, Goutay J, Caplan M, *et al.* Pulmonary Embolism in Patients With COVID-19:  
40 Awareness of an Increased Prevalence. *Circulation* 2020;**142**:184–6.  
41  
42 51 Clouston SAP, Luft BJ, Sun E. Clinical risk factors for mortality in an analysis of 1375  
43 patients admitted for COVID treatment. *Sci Rep* 2021;**11**:23414.  
44  
45 52 Cueto-Manzano AM, Espinel-Bermúdez MC, Hernández-González SO, *et al.* Risk factors  
46 for mortality of adult patients with COVID-19 hospitalised in an emerging country: a cohort  
47 study. *BMJ Open* 2021;**11**:e050321.  
48  
49 53 Yu D, Du Q, Yan S, *et al.* Liver injury in COVID-19: clinical features and treatment  
50 management. *Virol J* 2021;**18**:121.  
51  
52  
53 54 Cohen JB, D'Agostino McGowan L, Jensen ET, *et al.* Evaluating sources of bias in  
54 observational studies of angiotensin-converting enzyme inhibitor/angiotensin II receptor  
55 blocker use during COVID-19: beyond confounding. *J Hypertens* 2021;**39**:795–805.  
56  
57  
58  
59  
60

- 1  
2  
3 55 RECOVERY Collaborative Group, Horby P, Lim WS, *et al.* Dexamethasone in  
4 Hospitalized Patients with Covid-19. *N Engl J Med* 2021;**384**:693–704.  
5  
6 56 Kim W-Y, Kweon OJ, Cha MJ, *et al.* Dexamethasone may improve severe COVID-19 via  
7 ameliorating endothelial injury and inflammation: A preliminary pilot study. *PLoS One*  
8 2021;**16**:e0254167.  
9  
10 57 Garibaldi BT, Wang K, Robinson ML, *et al.* Comparison of Time to Clinical Improvement  
11 With vs Without Remdesivir Treatment in Hospitalized Patients With COVID-19. *JAMA*  
12 *Netw Open* 2021;**4**:e213071.  
13  
14 58 Thachil J, Juffermans NP, Ranucci M, *et al.* ISTH DIC subcommittee communication on  
15 anticoagulation in COVID-19. *J Thromb Haemost* 2020;**18**:2138–44.  
16  
17 59 Helms J, Tacquard C, Severac F, *et al.* High risk of thrombosis in patients with severe  
18 SARS-CoV-2 infection: a multicenter prospective cohort study. *Intensive Care Med*  
19 2020;**46**:1089–98.  
20  
21 60 Criel M, Falter M, Jaeken J, *et al.* Venous thromboembolism in SARS-CoV-2 patients: only  
22 a problem in ventilated ICU patients, or is there more to it? *Eur Respir J* 2020;**56**.  
23 doi:10.1183/13993003.01201-2020  
24  
25 61 Yu B, Li X, Chen J, *et al.* Evaluation of variation in D-dimer levels among COVID-19 and  
26 bacterial pneumonia: a retrospective analysis. *J Thromb Thrombolysis* 2020;**50**:548–57.  
27  
28 62 Dessie ZG, Zewotir T. Mortality-related risk factors of COVID-19: a systematic review and  
29 meta-analysis of 42 studies and 423,117 patients. *BMC Infect Dis* 2021;**21**:855.  
30  
31 63 Albitar O, Ballouze R, Ooi JP, *et al.* Risk factors for mortality among COVID-19 patients.  
32 *Diabetes Res Clin Pract* 2020;**166**:108293.  
33  
34 64 Cai Q, Huang D, Yu H, *et al.* COVID-19: Abnormal liver function tests. *J Hepatol*  
35 2020;**73**:566–74.  
36  
37 65 Jenniskens M, Langouche L, Vanwijngaerden Y-M, *et al.* Cholestatic liver (dys)function  
38 during sepsis and other critical illnesses. *Intensive Care Med* 2016;**42**:16–27.  
39  
40 66 Cardoso FS, Pereira R, Germano N. Liver injury in critically ill patients with COVID-19: a  
41 case series. *Crit Care* 2020;**24**:190.  
42  
43 67 Lagana SM, Kudose S, Iuga AC, *et al.* Hepatic pathology in patients dying of COVID-19: a  
44 series of 40 cases including clinical, histologic, and virologic data. *Mod Pathol*  
45 2020;**33**:2147–55.  
46  
47 68 Klann JG, Strasser ZH, Hutch MR, *et al.* Distinguishing Admissions Specifically for  
48 COVID-19 from Incidental SARS-CoV-2 Admissions: A National EHR Research  
49 Consortium Study. *medRxiv* 2022;:2022.02.10.22270728.  
50  
51  
52  
53  
54  
55  
56  
57  
58  
59



**Figure 1: Demographic shifts. For demographics variables, we set male sex, age 50-69, and White race as reference groups.**



**Figure 2: Distribution of laboratory values at admission.**

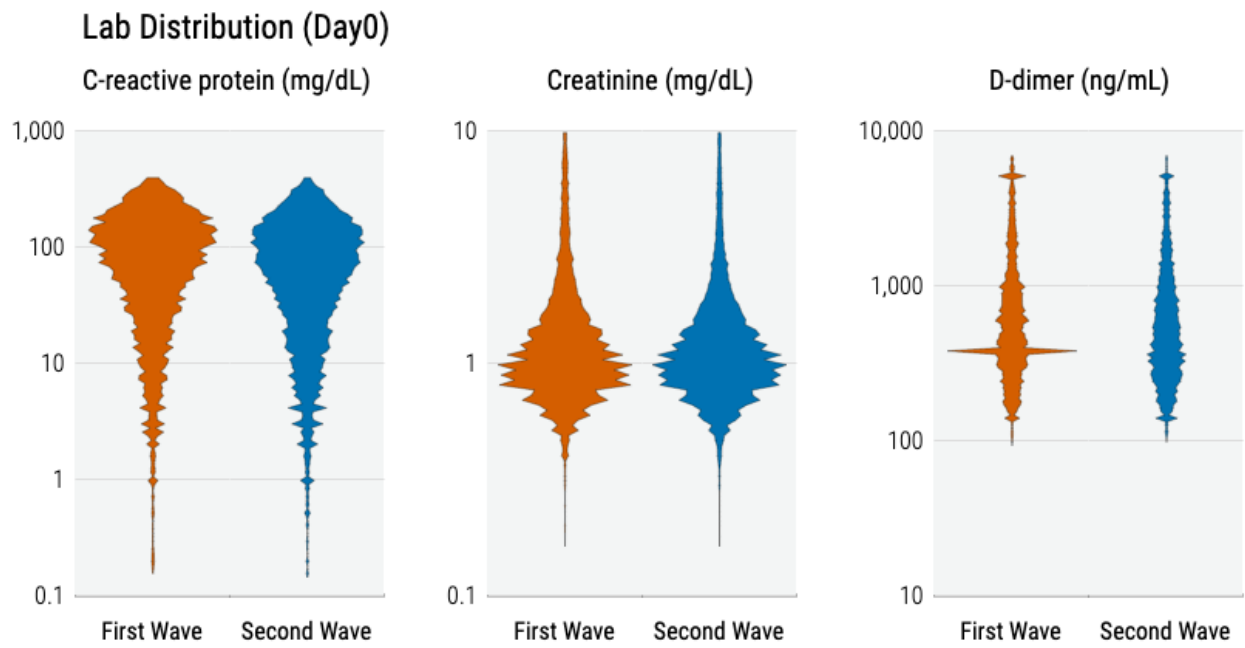

er review only

**Figure 3: Patient-level laboratory recovery rate.**



**Figure 4. Hazard ratio of the Cox model for mortality risk prediction (excluding Italy)**



review only

**Figure 5: Risk model results w/event rate information and risk stratification.**



## SUPPLEMENTARY FIGURES

---

Supplementary eTable 1: Participating hospitals.

Supplementary eFigure 1: Schematic of the federated EHR-based study involving healthcare systems from five countries.

Supplementary eFigure 2: Country-level demographic shifts.

Supplementary eFigure 3: Country-level Distribution of laboratory values at admission.

Supplementary eFigure 4: Patient-level laboratory recovery rate. (a) country-level changes in the recovery rates of laboratory measures (excluding Germany and Italy due to the small number of patients with longitudinal laboratory measurements available); (b) distribution of length of hospital stay among patients admitted in the first wave and in the second wave.

Supplementary eFigure 5: Country-level hazard ratio of the Cox model for mortality risk prediction (excluding Italy).

Supplementary eFigure 6. AUC of the Cox regression model for mortality risk prediction (excluding Italy).

Supplementary eFigure 7: Country-level risk model results w/ event rate information and risk stratification (excluding Italy).

**eTable 1: Participating healthcare systems. The 170 US Veterans Affairs (VA) hospitals were grouped into 5 regional healthcare systems [1].**

| Healthcare system                          | Acronym | Country | City                          | Hospitals | Beds   | Inpatient discharges/year |
|--------------------------------------------|---------|---------|-------------------------------|-----------|--------|---------------------------|
| Assistance Publique - Hôpitaux de Paris    | APHP    | France  | Paris                         | 39        | 20 098 | 1 375 538                 |
| Beth Israel Deaconess Medical Center       | BIDMC   | USA     | Boston, MA                    | 1         | 673    | 40 752                    |
| Bordeaux University Hospital               | FRBDX   | France  | Bordeaux                      | 3         | 2 676  | 130 033                   |
| Hospital Universitario 12 de Octubre       | H12O    | Spain   | Madrid                        | 1         | 1 256  | 45 035                    |
| ICSM Hospitals                             | ICSM    | Italy   | Pavia/Milan/Lumezzane/Brescia | 3         | 775    | 12 344                    |
| Mass General Brigham (Partners Healthcare) | MGB     | USA     | Boston, MA                    | 10        | 3 418  | 163 521                   |
| Northwestern University                    | NWU     | USA     | Chicago, IL                   | 10        | 2 234  | 103 279                   |
| University of California, LA               | UCLA    | USA     | Los Angeles, CA               | 2         | 786    | 40 526                    |
| University of Kansas Medical Center        | KUMC    | USA     | Kansas City, KS               | 1         | 794    | 54 659                    |
| University of Freiburg, Medical Center     | UKFR    | Germany | Freiburg                      | 1         | 1 660  | 71 500                    |
| University of Michigan                     | UMICH   | USA     | Ann Arbor, MI                 | 3         | 1000   | 49 008                    |
| University of Pennsylvania                 | UPENN   | USA     | Philadelphia, PA              | 5         | 2 469  | 118 188                   |
| University of Pittsburgh                   | UPITT   | USA     | Pittsburgh, PA                | 39        | 8 085  | 369 300                   |
| VA North Atlantic                          | VA1     | USA     |                               | 49        | 3 594  | 151 075                   |
| VA Southwest                               | VA2     | USA     |                               | 29        | 3 115  | 156 315                   |
| VA Midwest                                 | VA3     | USA     |                               | 39        | 2 686  | 145 468                   |
| VA Continental                             | VA4     | USA     |                               | 24        | 2 110  | 113 260                   |
| VA Pacific                                 | VA5     | USA     |                               | 29        | 2 296  | 114 569                   |
| Total                                      |         |         |                               | 288       | 59 725 | 3 254 370                 |

eFigure 1. Schematic of the federated EHR-based study involving healthcare systems from five countries. (created with BioRender.com )



Remark: The hospitalization rate over time tends to differ across regions and across countries, in part due to heterogeneity in a wide range of regional factors including community morbidity and local social distancing policy. This results in different relative sample sizes across healthcare centers over time. To ensure that the temporal trends in clinical presentations summarized via meta-analysis combining all healthcare centers are not driven by the temporal change in the relative sample sizes, we used the same weight for each healthcare center across different calendar months.



eFigure 2. Country-level demographic shifts.



eFigure 3. Country-level Distribution of laboratory values at admission. The Italy site had a relatively low percentage of patients with laboratory measurements which may have led to less precise estimates in these laboratory changes.



eFigure 4. Patient-level laboratory recovery rate. (a) country-level changes in the recovery rates of laboratory measures (excluding Germany and Italy due to the small number of patients with longitudinal laboratory measurements available); (b) distribution of length of hospital stay among patients admitted in the first wave and in the second wave

(a) country-level changes in the recovery rates of laboratory measures



(b) Distribution of length of hospital stay among patients admitted in the first wave and in the second wave



eFigure 5. Hazard ratio of the Cox model for mortality risk prediction (excluding Italy).

1  
2  
3  
4  
5  
6  
7  
8  
9  
10  
11  
12  
13  
14  
15  
16  
17  
18  
19  
20  
21  
22  
23  
24  
25  
26  
27  
28  
29  
30  
31  
32  
33  
34  
35  
36  
37  
38  
39  
40  
41  
42  
43  
44  
45  
46  
47  
48  
49  
50  
51  
52  
53  
54  
55  
56  
57  
58  
59  
60



eFigure 6. AUC of the Cox regression model for mortality risk prediction (excluding Italy).

(a) Meta-analysis over all countries.



(b) Country-level AUC over time. AUC was not reported for May–June 2020, and July–August 2020 in Germany due to small counts of death occurring during these months.

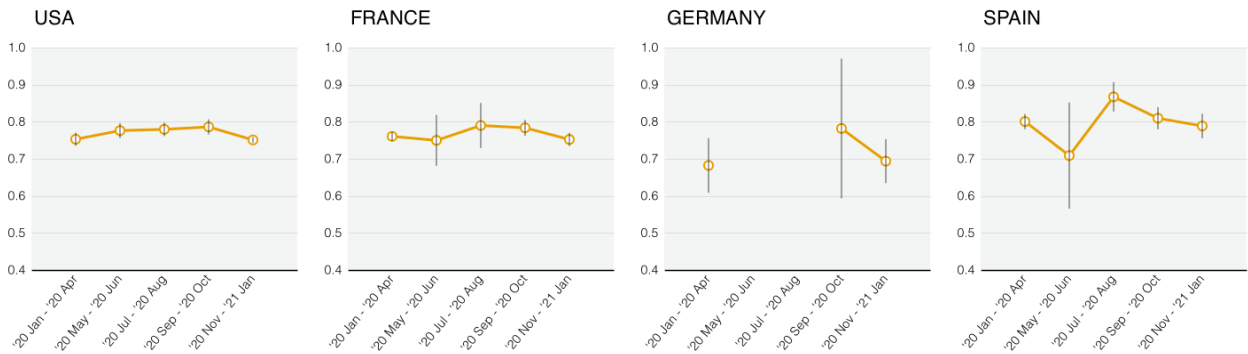

eFigure 7. Country-level risk model results w/ event rate information and risk stratification (excluding Italy).



1. Jones AL, Petty WBP, Carter ME, Brignone E, Redd A, Suo Y, et al. Regional Variations in Documentation of Sexual Trauma Concepts in Electronic Medical Records in the United States Veterans Health Administration. AMIA Annu Symp Proc. 2019;2019: 514–522.

STROBE Statement—Checklist of items that should be included in reports of *cohort studies*

|                              | Item No | Recommendation                                                                                                                                                                                                                                                                                                         | Page No                   |
|------------------------------|---------|------------------------------------------------------------------------------------------------------------------------------------------------------------------------------------------------------------------------------------------------------------------------------------------------------------------------|---------------------------|
| <b>Title and abstract</b>    | 1       | (a) Indicate the study's design with a commonly used term in the title or the abstract                                                                                                                                                                                                                                 | 1                         |
|                              |         | (b) Provide in the abstract an informative and balanced summary of what was done and what was found                                                                                                                                                                                                                    | 3-4                       |
| <b>Introduction</b>          |         |                                                                                                                                                                                                                                                                                                                        |                           |
| Background/rationale         | 2       | Explain the scientific background and rationale for the investigation being reported                                                                                                                                                                                                                                   | 5                         |
| Objectives                   | 3       | State specific objectives, including any prespecified hypotheses                                                                                                                                                                                                                                                       | 5                         |
| <b>Methods</b>               |         |                                                                                                                                                                                                                                                                                                                        |                           |
| Study design                 | 4       | Present key elements of study design early in the paper                                                                                                                                                                                                                                                                | 5                         |
| Setting                      | 5       | Describe the setting, locations, and relevant dates, including periods of recruitment, exposure, follow-up, and data collection                                                                                                                                                                                        | 6                         |
| Participants                 | 6       | (a) Give the eligibility criteria, and the sources and methods of selection of participants. Describe methods of follow-up<br>(b) For matched studies, give matching criteria and number of exposed and unexposed                                                                                                      | 6                         |
| Variables                    | 7       | Clearly define all outcomes, exposures, predictors, potential confounders, and effect modifiers. Give diagnostic criteria, if applicable                                                                                                                                                                               | 6-7                       |
| Data sources/<br>measurement | 8*      | For each variable of interest, give sources of data and details of methods of assessment (measurement). Describe comparability of assessment methods if there is more than one group                                                                                                                                   | 6                         |
| Bias                         | 9       | Describe any efforts to address potential sources of bias                                                                                                                                                                                                                                                              | 11                        |
| Study size                   | 10      | Explain how the study size was arrived at                                                                                                                                                                                                                                                                              | 6                         |
| Quantitative variables       | 11      | Explain how quantitative variables were handled in the analyses. If applicable, describe which groupings were chosen and why                                                                                                                                                                                           | 7                         |
| Statistical methods          | 12      | (a) Describe all statistical methods, including those used to control for confounding<br>(b) Describe any methods used to examine subgroups and interactions<br>(c) Explain how missing data were addressed<br>(d) If applicable, explain how loss to follow-up was addressed<br>(e) Describe any sensitivity analyses | 6-7<br>6-7<br>7<br>7<br>7 |
| <b>Results</b>               |         |                                                                                                                                                                                                                                                                                                                        |                           |

1  
2  
3  
4  
5  
6  
7  
8  
9  
10  
11  
12  
13  
14  
15  
16  
17  
18  
19  
20  
21  
22  
23  
24  
25  
26  
27  
28  
29  
30  
31  
32  
33  
34  
35  
36  
37  
38  
39  
40  
41  
42  
43  
44  
45  
46  
47  
48  
49  
50  
51  
52  
53  
54  
55  
56  
57  
58  
59  
60

|                  |     |                                                                                                                                                                                                                                                                                                         |            |
|------------------|-----|---------------------------------------------------------------------------------------------------------------------------------------------------------------------------------------------------------------------------------------------------------------------------------------------------------|------------|
| Participants     | 13* | (a) Report numbers of individuals at each stage of study—eg numbers potentially eligible, examined for eligibility, confirmed eligible, included in the study, completing follow-up, and analysed<br><br>(b) Give reasons for non-participation at each stage<br><br>(c) Consider use of a flow diagram | 8          |
| Descriptive data | 14* | (a) Give characteristics of study participants (eg demographic, clinical, social) and information on exposures and potential confounders<br><br>(b) Indicate number of participants with missing data for each variable of interest<br><br>(c) Summarise follow-up time (eg, average and total amount)  | 8<br><br>8 |
| Outcome data     | 15* | Report numbers of outcome events or summary measures over time                                                                                                                                                                                                                                          | 8-9        |



|    |                          |    |                                                                                                                                                                                                              |
|----|--------------------------|----|--------------------------------------------------------------------------------------------------------------------------------------------------------------------------------------------------------------|
| 1  |                          |    |                                                                                                                                                                                                              |
| 2  | Main results             | 16 | (a) Give unadjusted estimates and, if applicable, confounder-adjusted estimates and their precision (eg, 95% confidence interval). Make clear which confounders were adjusted for and why they were included |
| 3  |                          |    |                                                                                                                                                                                                              |
| 4  |                          |    |                                                                                                                                                                                                              |
| 5  |                          |    |                                                                                                                                                                                                              |
| 6  |                          |    | (b) Report category boundaries when continuous variables were categorized                                                                                                                                    |
| 7  |                          |    |                                                                                                                                                                                                              |
| 8  |                          |    | (c) If relevant, consider translating estimates of relative risk into absolute risk for a meaningful time period                                                                                             |
| 9  |                          |    |                                                                                                                                                                                                              |
| 10 |                          |    |                                                                                                                                                                                                              |
| 11 | Other analyses           | 17 | Report other analyses done—eg analyses of subgroups and interactions, and sensitivity analyses                                                                                                               |
| 12 |                          |    |                                                                                                                                                                                                              |
| 13 |                          |    |                                                                                                                                                                                                              |
| 14 |                          |    |                                                                                                                                                                                                              |
| 15 | <b>Discussion</b>        |    |                                                                                                                                                                                                              |
| 16 |                          |    |                                                                                                                                                                                                              |
| 17 | Key results              | 18 | Summarise key results with reference to study objectives                                                                                                                                                     |
| 18 |                          |    |                                                                                                                                                                                                              |
| 19 | Limitations              | 19 | Discuss limitations of the study, taking into account sources of potential bias or imprecision. Discuss both direction and magnitude of any potential bias                                                   |
| 20 |                          |    |                                                                                                                                                                                                              |
| 21 |                          |    |                                                                                                                                                                                                              |
| 22 | Interpretation           | 20 | Give a cautious overall interpretation of results considering objectives, limitations, multiplicity of analyses, results from similar studies, and other relevant evidence                                   |
| 23 |                          |    |                                                                                                                                                                                                              |
| 24 |                          |    |                                                                                                                                                                                                              |
| 25 | Generalisability         | 21 | Discuss the generalisability (external validity) of the study results                                                                                                                                        |
| 26 |                          |    |                                                                                                                                                                                                              |
| 27 |                          |    |                                                                                                                                                                                                              |
| 28 |                          |    |                                                                                                                                                                                                              |
| 29 | <b>Other information</b> |    |                                                                                                                                                                                                              |
| 30 |                          |    |                                                                                                                                                                                                              |
| 31 | Funding                  | 22 | Give the source of funding and the role of the funders for the present study and, if applicable, for the original study on which the present article is based                                                |
| 32 |                          |    |                                                                                                                                                                                                              |
| 33 |                          |    |                                                                                                                                                                                                              |
| 34 |                          |    |                                                                                                                                                                                                              |
| 35 |                          |    |                                                                                                                                                                                                              |

\*Give information separately for exposed and unexposed groups.

**Note:** An Explanation and Elaboration article discusses each checklist item and gives methodological background and published examples of transparent reporting. The STROBE checklist is best used in conjunction with this article (freely available on the Web sites of PLoS Medicine at <http://www.plosmedicine.org/>, Annals of Internal Medicine at <http://www.annals.org/>, and Epidemiology at <http://www.epidem.com/>). Information on the STROBE Initiative is available at <http://www.strobe-statement.org>.
